# Supplementary material
Source: PubMed Central journal article supplement (PMC3077121)
Supplement: NIHMS254589-supplement-1_si_001.pdf [file NIHMS254589-supplement-1_si_001.pdf]

## Supporting Information for

### Nitropyrrolins A-E, Farnesyl- $\alpha$ -Nitropyrroles from a Marine-Derived Bacterium Related to the Genus *Streptomyces*

Hak Cheol Kwon,<sup>†,§</sup> Ana Paula D. M. Espindola,<sup>‡,§</sup> Jin-Soo Park,<sup>†</sup> Alejandra Prieto-Davo,<sup>‡</sup> Mickea Rose <sup>‡</sup>, Paul R. Jensen<sup>‡</sup> and William Fenical<sup>\*,‡</sup>

*Natural Pharmaceuticals Center, Korea Institute of Science and Technology (KIST), Gangneung, Gangwon-do 210-340, Republic of Korea, and Center for Marine Biotechnology and Biomedicine, Scripps Institution of Oceanography, University of California at San Diego, La Jolla, CA 92093-0204, USA.*

\* To whom Correspondence should be addressed. Tel: + 1 858 534 2133 . Fax: + 1 858 558 3702 . E-mail address: wfenical@ucsd.edu

<sup>†</sup>Korea Institute of Science and Technology, Gangneung.

<sup>‡</sup>Scripps Institution of Oceanography.

<sup>§</sup>Contributed equally to this work.

## Table of Contents

---

|                   |                                                                                                                                                     |     |
|-------------------|-----------------------------------------------------------------------------------------------------------------------------------------------------|-----|
| <b>Figure S1</b>  | UV spectrum of nitropyrrolin A ( <b>1</b> ) in CH <sub>3</sub> OH (10 <sup>-4</sup> M) .....                                                        | S5  |
| <b>Figure S2</b>  | MS data of nitropyrrolin A ( <b>1</b> ) .....                                                                                                       | S6  |
| <b>Table S1</b>   | NMR data for nitropyrrolin A ( <b>1</b> ) in CDCl <sub>3</sub> .....                                                                                | S7  |
| <b>Figure S3</b>  | <sup>1</sup> H NMR spectrum of nitropyrrolin A ( <b>1</b> ) in CDCl <sub>3</sub> (500 MHz) .....                                                    | S8  |
| <b>Figure S4</b>  | <sup>13</sup> C NMR spectrum of nitropyrrolin A ( <b>1</b> ) in CDCl <sub>3</sub> (125 MHz) .....                                                   | S9  |
| <b>Figure S5</b>  | <sup>1</sup> H- <sup>1</sup> H gCOSY spectrum of nitropyrrolin A ( <b>1</b> ) in CDCl <sub>3</sub> (500 MHz) .....                                  | S10 |
| <b>Figure S6</b>  | gHSQC spectrum of nitropyrrolin A ( <b>1</b> ) in CDCl <sub>3</sub> (500 MHz) .....                                                                 | S11 |
| <b>Figure S7</b>  | gHMBC spectrum of nitropyrrolin A ( <b>1</b> ) in CDCl <sub>3</sub> (500 MHz) .....                                                                 | S12 |
| <b>Figure S8</b>  | 2D NOESY spectrum of nitropyrrolin A ( <b>1</b> ) in CDCl <sub>3</sub> (500 MHz) .....                                                              | S13 |
| <b>Figure S9</b>  | UV spectra of nitropyrrolins B ( <b>2</b> ), C ( <b>3</b> ), D ( <b>4</b> ) and E ( <b>5</b> ) in CH <sub>3</sub> OH (10 <sup>-4</sup> M) .....     | S14 |
| <b>Figure S10</b> | MS data of nitropyrrolin B ( <b>2</b> ) .....                                                                                                       | S15 |
| <b>Table S2</b>   | NMR data for nitropyrrolin B ( <b>2</b> ) in CDCl <sub>3</sub> .....                                                                                | S16 |
| <b>Figure S11</b> | <sup>1</sup> H NMR spectrum of nitropyrrolin B ( <b>2</b> ) in CDCl <sub>3</sub> (500 MHz) .....                                                    | S17 |
| <b>Figure S12</b> | <sup>13</sup> C NMR spectrum of nitropyrrolin B ( <b>2</b> ) in CDCl <sub>3</sub> (125 MHz) .....                                                   | S18 |
| <b>Figure S13</b> | <sup>1</sup> H- <sup>1</sup> H gCOSY spectrum of nitropyrrolin B ( <b>2</b> ) in CDCl <sub>3</sub> (500 MHz) .....                                  | S19 |
| <b>Figure S14</b> | gHSQC spectrum of nitropyrrolin B ( <b>2</b> ) in CDCl <sub>3</sub> (500 MHz) .....                                                                 | S20 |
| <b>Figure S15</b> | gHMBC spectrum of nitropyrrolin B ( <b>2</b> ) in CDCl <sub>3</sub> (500 MHz) .....                                                                 | S21 |
| <b>Figure S16</b> | Selective 1D NOESY spectrum of nitropyrrolin B ( <b>2</b> ) in CDCl <sub>3</sub> (500 MHz), irradiation of H-2' signal at d <sub>H</sub> 2.94 ..... | S22 |
| <b>Figure S17</b> | MS data of nitropyrrolin C ( <b>3</b> ) .....                                                                                                       | S23 |
| <b>Table S3</b>   | NMR data for nitropyrrolin C ( <b>3</b> ) in CDCl <sub>3</sub> .....                                                                                | S24 |
| <b>Figure S18</b> | <sup>1</sup> H NMR spectrum of nitropyrrolin C ( <b>3</b> ) in CDCl <sub>3</sub> (500 MHz) .....                                                    | S25 |
| <b>Figure S19</b> | <sup>13</sup> C NMR spectrum of nitropyrrolin C ( <b>3</b> ) in CDCl <sub>3</sub> (125 MHz) .....                                                   | S26 |
| <b>Figure S20</b> | <sup>1</sup> H- <sup>1</sup> H gCOSY spectrum of nitropyrrolin C ( <b>3</b> ) in CDCl <sub>3</sub> (500 MHz) .....                                  | S27 |

|                   |                                                                                                                                                                   |       |     |
|-------------------|-------------------------------------------------------------------------------------------------------------------------------------------------------------------|-------|-----|
| <b>Figure S21</b> | gHSQC spectrum of nitropyrrolin C ( <b>3</b> ) in CDCl <sub>3</sub> (500 MHz)                                                                                     | ..... | S28 |
| <b>Figure S22</b> | gHMBC spectrum of nitropyrrolin C ( <b>3</b> ) in CDCl <sub>3</sub> (500 MHz)                                                                                     | ..... | S29 |
| <b>Figure S23</b> | Selective 1D NOESY spectrum of nitropyrrolin C ( <b>3</b> ) in CDCl <sub>3</sub> (500 MHz), irradiation of H-2' signal at $\delta_{\text{H}}$ 3.75                | ..... | S30 |
| <b>Figure S24</b> | Selective 1D NOESY spectrum of nitropyrrolin C ( <b>3</b> ) in CDCl <sub>3</sub> (500 MHz), irradiation of H <sub>2</sub> -1'a signal at $\delta_{\text{H}}$ 2.93 | ..... | S31 |
| <b>Figure S25</b> | Selective 1D NOESY spectrum of nitropyrrolin C ( <b>3</b> ) in DMSO- <i>d</i> <sub>6</sub> (500 MHz), irradiation of H-2' signal                                  | ..... | S32 |
| <b>Figure S26</b> | Selective 1D NOESY spectrum of nitropyrrolin C ( <b>3</b> ) in DMSO- <i>d</i> <sub>6</sub> (500 MHz), irradiation of H-1'a signal                                 | ..... | S33 |
| <b>Figure S27</b> | Selective 1D NOESY spectrum of nitropyrrolin C ( <b>3</b> ) in DMSO- <i>d</i> <sub>6</sub> (500 MHz), irradiation of H-1'b signal                                 | ..... | S34 |
| <b>Figure S28</b> | MS data of nitropyrrolin D ( <b>4</b> )                                                                                                                           | ..... | S35 |
| <b>Table S4</b>   | NMR data for nitropyrrolin D ( <b>4</b> ) in CDCl <sub>3</sub>                                                                                                    | ..... | S36 |
| <b>Figure S29</b> | <sup>1</sup> H NMR spectrum of nitropyrrolin D ( <b>4</b> ) in CDCl <sub>3</sub> (500 MHz)                                                                        | ..... | S37 |
| <b>Figure S30</b> | <sup>13</sup> C NMR spectrum of nitropyrrolin D ( <b>4</b> ) in CDCl <sub>3</sub> (125 MHz)                                                                       | ..... | S38 |
| <b>Figure S31</b> | <sup>1</sup> H- <sup>1</sup> H gCOSY spectrum of nitropyrrolin D ( <b>4</b> ) in CDCl <sub>3</sub> (500 MHz)                                                      | ..... | S39 |
| <b>Figure S32</b> | gHSQC spectrum of nitropyrrolin D ( <b>4</b> ) in CDCl <sub>3</sub> (500 MHz)                                                                                     | ..... | S40 |
| <b>Figure S33</b> | gHMBC spectrum of nitropyrrolin D ( <b>4</b> ) in CDCl <sub>3</sub> (500 MHz)                                                                                     | ..... | S41 |
| <b>Figure S34</b> | 2D NOESY spectrum of nitropyrrolin D ( <b>4</b> ) in CDCl <sub>3</sub> (500 MHz)                                                                                  | ..... | S42 |
| <b>Figure S35</b> | MS data of nitropyrrolin E ( <b>5</b> )                                                                                                                           | ..... | S43 |
| <b>Table S5</b>   | NMR data for nitropyrrolin E ( <b>5</b> ) in CDCl <sub>3</sub>                                                                                                    | ..... | S44 |
| <b>Figure S36</b> | <sup>1</sup> H NMR spectrum of nitropyrrolin E ( <b>5</b> ) in CDCl <sub>3</sub> (500 MHz)                                                                        | ..... | S45 |
| <b>Figure S37</b> | <sup>13</sup> C NMR spectrum of nitropyrrolin E ( <b>5</b> ) in CDCl <sub>3</sub> (125 MHz)                                                                       | ..... | S46 |
| <b>Figure S38</b> | <sup>1</sup> H- <sup>1</sup> H gCOSY spectrum of nitropyrrolin E ( <b>5</b> ) in CDCl <sub>3</sub> (500 MHz)                                                      | ..... | S47 |
| <b>Figure S39</b> | gHSQC spectrum of nitropyrrolin E ( <b>5</b> ) in CDCl <sub>3</sub> (500 MHz)                                                                                     | ..... | S48 |
| <b>Figure S40</b> | gHMBC spectrum of nitropyrrolin E ( <b>5</b> ) in CDCl <sub>3</sub> (500 MHz)                                                                                     | ..... | S49 |
| <b>Figure S41</b> | 2D NOESY spectrum of nitropyrrolin E ( <b>5</b> ) in CDCl <sub>3</sub> (500 MHz)                                                                                  | ..... | S50 |
| <b>Figure S42</b> | <sup>1</sup> H NMR spectrum of 3-farnesyl-pyrrole ( <b>6</b> ) in CDCl <sub>3</sub> (500 MHz)                                                                     | ..... | S51 |
| <b>Figure S43</b> | UV spectra of synthetic farnesyl- $\alpha$ -nitropyrroles ( <b>7</b> and <b>8</b> )                                                                               | ..... | S52 |

|                   |                                                                                                                                                        |       |     |
|-------------------|--------------------------------------------------------------------------------------------------------------------------------------------------------|-------|-----|
| <b>Figure S44</b> | <sup>1</sup> H NMR spectrum of $\gamma$ -farnesyl- $\alpha$ -nitropyrrole ( <b>7</b> ) in CDCl <sub>3</sub> (500 MHz)                                  | ..... | S53 |
| <b>Figure S45</b> | <sup>13</sup> C NMR spectrum of $\gamma$ -farnesyl- $\alpha$ -nitropyrrole ( <b>7</b> ) in CDCl <sub>3</sub> (500 MHz)                                 | ..... | S54 |
| <b>Figure S46</b> | <sup>1</sup> H NMR spectrum of $\beta$ -farnesyl- $\alpha$ -nitropyrrole ( <b>8</b> ) in CDCl <sub>3</sub> (500 MHz)                                   | ..... | S55 |
| <b>Figure S47</b> | <sup>13</sup> C NMR spectrum of $\beta$ -farnesyl- $\alpha$ -nitropyrrole ( <b>8</b> ) in CDCl <sub>3</sub> (500 MHz)                                  | ..... | S56 |
| <b>Figure S48</b> | <sup>1</sup> H NMR spectrum of the ( <i>S</i> )-Mosher ester of <b>1</b> ( <b>9a</b> ) in pyridine- <i>d</i> <sub>5</sub> (500 MHz)                    | ..... | S57 |
| <b>Figure S49</b> | <sup>1</sup> H- <sup>1</sup> H gCOSY spectrum of the ( <i>S</i> )-Mosher ester of <b>1</b> ( <b>9a</b> ) in pyridine- <i>d</i> <sub>5</sub> (500 MHz)  | ..... | S58 |
| <b>Figure S50</b> | <sup>1</sup> H NMR spectrum of the ( <i>R</i> )-Mosher ester of <b>1</b> ( <b>9b</b> ) in pyridine- <i>d</i> <sub>5</sub> (500 MHz)                    | ..... | S59 |
| <b>Figure S51</b> | <sup>1</sup> H- <sup>1</sup> H gCOSY spectrum of the ( <i>R</i> )-Mosher ester of <b>1</b> ( <b>9b</b> ) in pyridine- <i>d</i> <sub>5</sub> (500 MHz)  | ..... | S60 |
| <b>Figure S52</b> | <sup>1</sup> H NMR spectrum of the acetonide derivative of <b>2</b> ( <b>10</b> ) in CDCl <sub>3</sub> (500 MHz)                                       | ..... | S61 |
| <b>Figure S53</b> | 2D NOESY spectrum of the acetonide derivative of <b>2</b> ( <b>10</b> ) in CDCl <sub>3</sub> (500 MHz)                                                 | ..... | S62 |
| <b>Figure S54</b> | <sup>1</sup> H NMR spectrum of the diol derivative of <b>2</b> ( <b>11</b> ) in CDCl <sub>3</sub> (500 MHz)                                            | ..... | S63 |
| <b>Figure S55</b> | 2D NOESY spectrum of the diol derivative of <b>2</b> ( <b>11</b> ) in CDCl <sub>3</sub> (500 MHz)                                                      | ..... | S64 |
| <b>Figure S56</b> | <sup>1</sup> H NMR spectrum of the ( <i>S</i> )-Mosher ester of <b>11</b> in pyridine- <i>d</i> <sub>5</sub> (500 MHz)                                 | ..... | S65 |
| <b>Figure S57</b> | <sup>1</sup> H NMR spectrum of the ( <i>S</i> )-Mosher ester of <b>3</b> ( <b>12a</b> ) in pyridine- <i>d</i> <sub>5</sub> (500 MHz)                   | ..... | S66 |
| <b>Figure S58</b> | <sup>1</sup> H- <sup>1</sup> H gCOSY spectrum of the ( <i>S</i> )-Mosher ester of <b>3</b> ( <b>12a</b> ) in pyridine- <i>d</i> <sub>5</sub> (500 MHz) | ..... | S67 |
| <b>Figure S59</b> | <sup>1</sup> H NMR spectrum of the ( <i>R</i> )-Mosher ester of <b>3</b> ( <b>12b</b> ) in pyridine- <i>d</i> <sub>5</sub> (500 MHz)                   | ..... | S68 |
| <b>Figure S60</b> | <sup>1</sup> H- <sup>1</sup> H gCOSY spectrum of the ( <i>R</i> )-Mosher ester of <b>3</b> ( <b>12b</b> ) in pyridine- <i>d</i> <sub>5</sub> (500 MHz) | ..... | S69 |
| <b>Figure S61</b> | <sup>1</sup> H NMR spectrum of the ( <i>S</i> )-Mosher ester of <b>4</b> ( <b>13a</b> ) in pyridine- <i>d</i> <sub>5</sub> (500 MHz)                   | ..... | S70 |
| <b>Figure S62</b> | <sup>1</sup> H- <sup>1</sup> H gCOSY spectrum of the ( <i>S</i> )-Mosher ester of <b>4</b> ( <b>13a</b> ) in pyridine- <i>d</i> <sub>5</sub> (500 MHz) | ..... | S71 |
| <b>Figure S63</b> | <sup>1</sup> H NMR spectrum of the ( <i>R</i> )-Mosher ester of <b>4</b> ( <b>13b</b> ) in pyridine- <i>d</i> <sub>5</sub> (500 MHz)                   | ..... | S72 |
| <b>Figure S64</b> | <sup>1</sup> H- <sup>1</sup> H gCOSY spectrum of the ( <i>R</i> )-Mosher ester of <b>4</b> ( <b>13b</b> ) in pyridine- <i>d</i> <sub>5</sub> (500 MHz) | ..... | S73 |
| <b>Figure S65</b> | <sup>1</sup> H NMR spectrum of the ( <i>S</i> )-Mosher ester of <b>5</b> ( <b>14a</b> ) in pyridine- <i>d</i> <sub>5</sub> (500 MHz)                   | ..... | S74 |
| <b>Figure S66</b> | <sup>1</sup> H- <sup>1</sup> H gCOSY spectrum of the ( <i>S</i> )-Mosher ester of <b>5</b> ( <b>14a</b> ) in pyridine- <i>d</i> <sub>5</sub> (500 MHz) | ..... | S75 |
| <b>Figure S67</b> | <sup>1</sup> H NMR spectrum of the ( <i>R</i> )-Mosher ester of <b>5</b> ( <b>14b</b> ) in pyridine- <i>d</i> <sub>5</sub> (500 MHz)                   | ..... | S76 |
| <b>Figure S68</b> | <sup>1</sup> H- <sup>1</sup> H gCOSY spectrum of the ( <i>R</i> )-Mosher ester of <b>5</b> ( <b>14b</b> ) in pyridine- <i>d</i> <sub>5</sub> (500 MHz) | ..... | S77 |

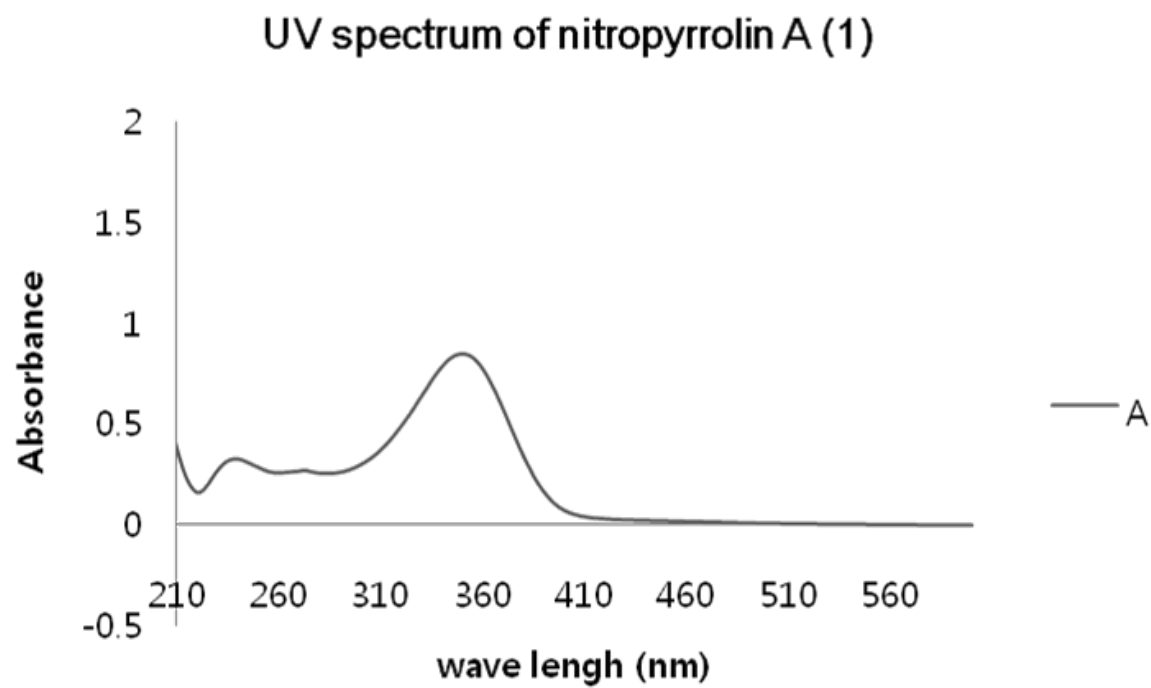

**Figure S1** UV spectrum of nitropyrrolin A (1) in  $\text{CH}_3\text{OH}$  ( $10^{-4}$  M).

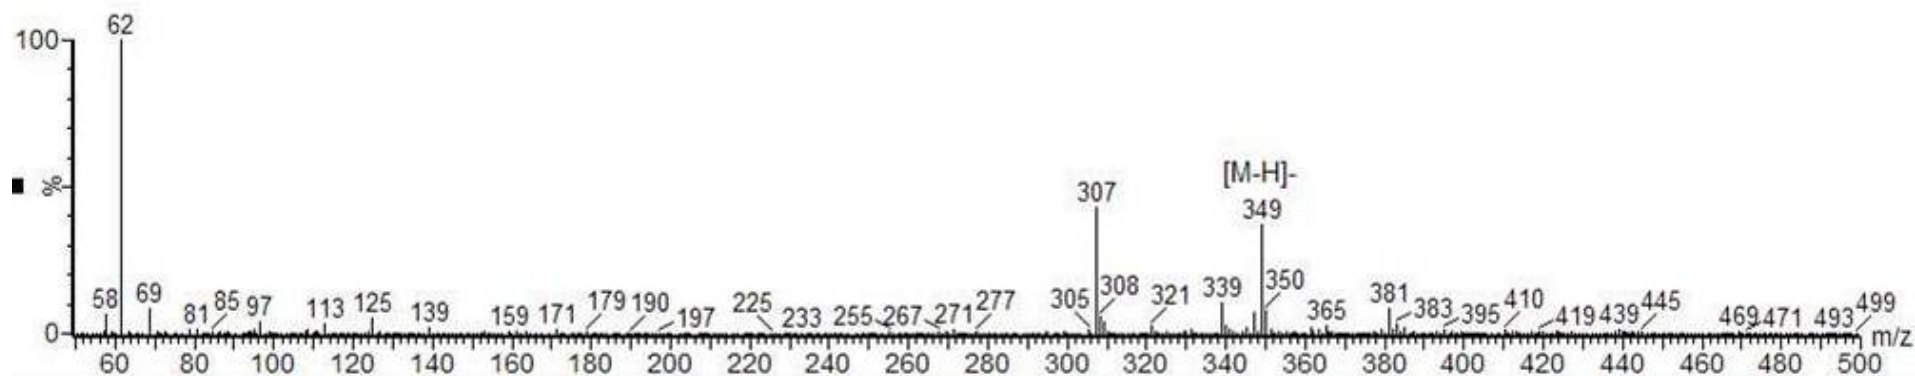

Selected Isotopes :  $C_{0.50}H_{0.100}O_{0.10}N_{0.5}$  Error Limit : 20 ppm

| <u>Measured Mass</u> | <u>% Base</u> | <u>Formula</u>       | <u>Calculated Mass</u> | <u>Error</u> |
|----------------------|---------------|----------------------|------------------------|--------------|
| 349.2124             | 94.7%         | $C_{24}H_{29}O_2$    | 349.2167               | 12.0         |
|                      |               | $C_{16}H_{31}O_7N$   | 349.2100               | -6.7         |
|                      |               | $C_{19}H_{29}O_4N_2$ | 349.2127               | 0.9          |
|                      |               | $C_{22}H_{27}ON_3$   | 349.2154               | 8.6          |
|                      |               | $C_{14}H_{29}O_6N_4$ | 349.2087               | -11.0        |
|                      |               | $C_{17}H_{27}O_3N_5$ | 349.2114               | -3.0         |

Figure S2 MS data of nitropyrrolin A (1) (Upper, positive ESI MS; Middle, negative ESI MS; Bottom, negative HR-FAB MS).

**Table S1.** NMR data for nitropyrrolin A (**1**) in CDCl<sub>3</sub>

| Position | $\delta_{\text{H}}$ mult ( $J$ in Hz)                            | $\delta_{\text{C}}$ | COSY         | HMBC                 | Key NOE |
|----------|------------------------------------------------------------------|---------------------|--------------|----------------------|---------|
| 1        | 9.49, br s                                                       |                     | 5            |                      |         |
| 2        |                                                                  | 137.5               |              |                      |         |
| 3        | 7.06, br s                                                       | 111.2               | 5, 1'        | 2, 4, 5, 1'          |         |
| 4        |                                                                  | 124.3               |              |                      |         |
| 5        | 6.90, br s                                                       | 122.2               | 3, 1'        | 2, 3, 4              |         |
| 1'       | 2.73, br dd (15.0, 2.0)<br>2.53, dd (15.0, 10.5)                 | 28.8                | 2'           | 3, 4, 5, 2', 3'      | 4', 15' |
| 2'       | 3.58, br dd (10.5, 2.0)                                          | 78.3                | 1'           | 4, 1', 3', 4', 15'   | 15'     |
| 3'       |                                                                  | 74.6                |              |                      |         |
| 4'       | 1.73, br ddd (14.0, 10.5, 6.0)<br>1.49, br ddd (14.0, 10.5, 6.0) | 36.2                | 5'           | 2', 3', 5'           | 1'      |
| 5'       | 2.20, m<br>2.14, m                                               | 22.0                | 4', 6'       | 3', 4', 6', 7'       |         |
| 6'       | 5.18, br t (7.0)                                                 | 124.1               | 5', 14'      | 4', 5', 8', 14'      | 8'      |
| 7'       |                                                                  | 136.0               |              |                      |         |
| 8'       | 2.01, m                                                          | 39.7                | 9'           | 6', 7', 9', 10', 14' | 6'      |
| 9'       | 2.09, m                                                          | 26.6                | 8', 10'      | 8', 10', 11'         |         |
| 10'      | 5.10, tq (7.0, 1.0)                                              | 124.1               | 9', 12', 13' | 8', 9', 12', 13'     | 12'     |
| 11'      |                                                                  | 131.6               |              |                      |         |
| 12'      | 1.69, br d (1.0)                                                 | 25.7                | 10'          | 10', 11', 13'        | 10'     |
| 13'      | 1.61, s                                                          | 17.7                | 10'          | 10', 11', 12'        |         |
| 14'      | 1.65, s                                                          | 16.1                | 6'           | 6', 7', 8'           |         |
| 15'      | 1.27, s                                                          | 23.4                |              | 2', 3', 4'           | 1', 2'  |





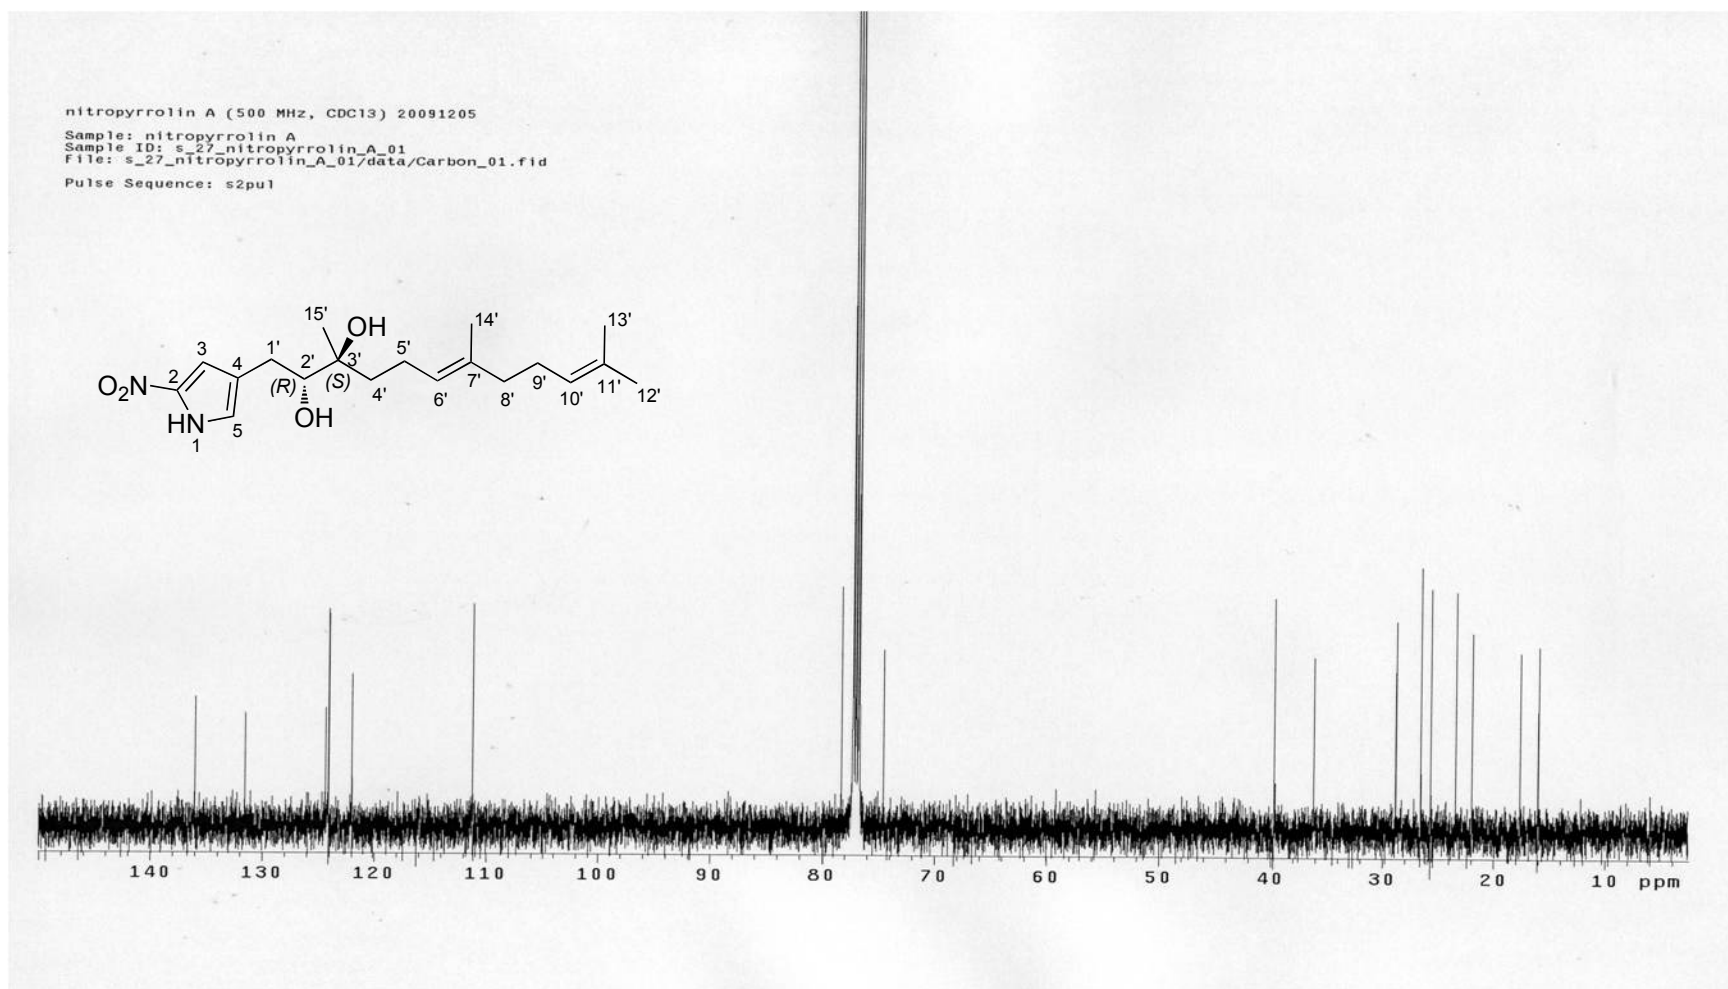

**Figure S4** <sup>13</sup>C NMR spectrum of nitropyrrolin A (**1**) in CDCl<sub>3</sub> (125 MHz), a reference signal: CDCl<sub>3</sub> at δ<sub>C</sub> 77.0.

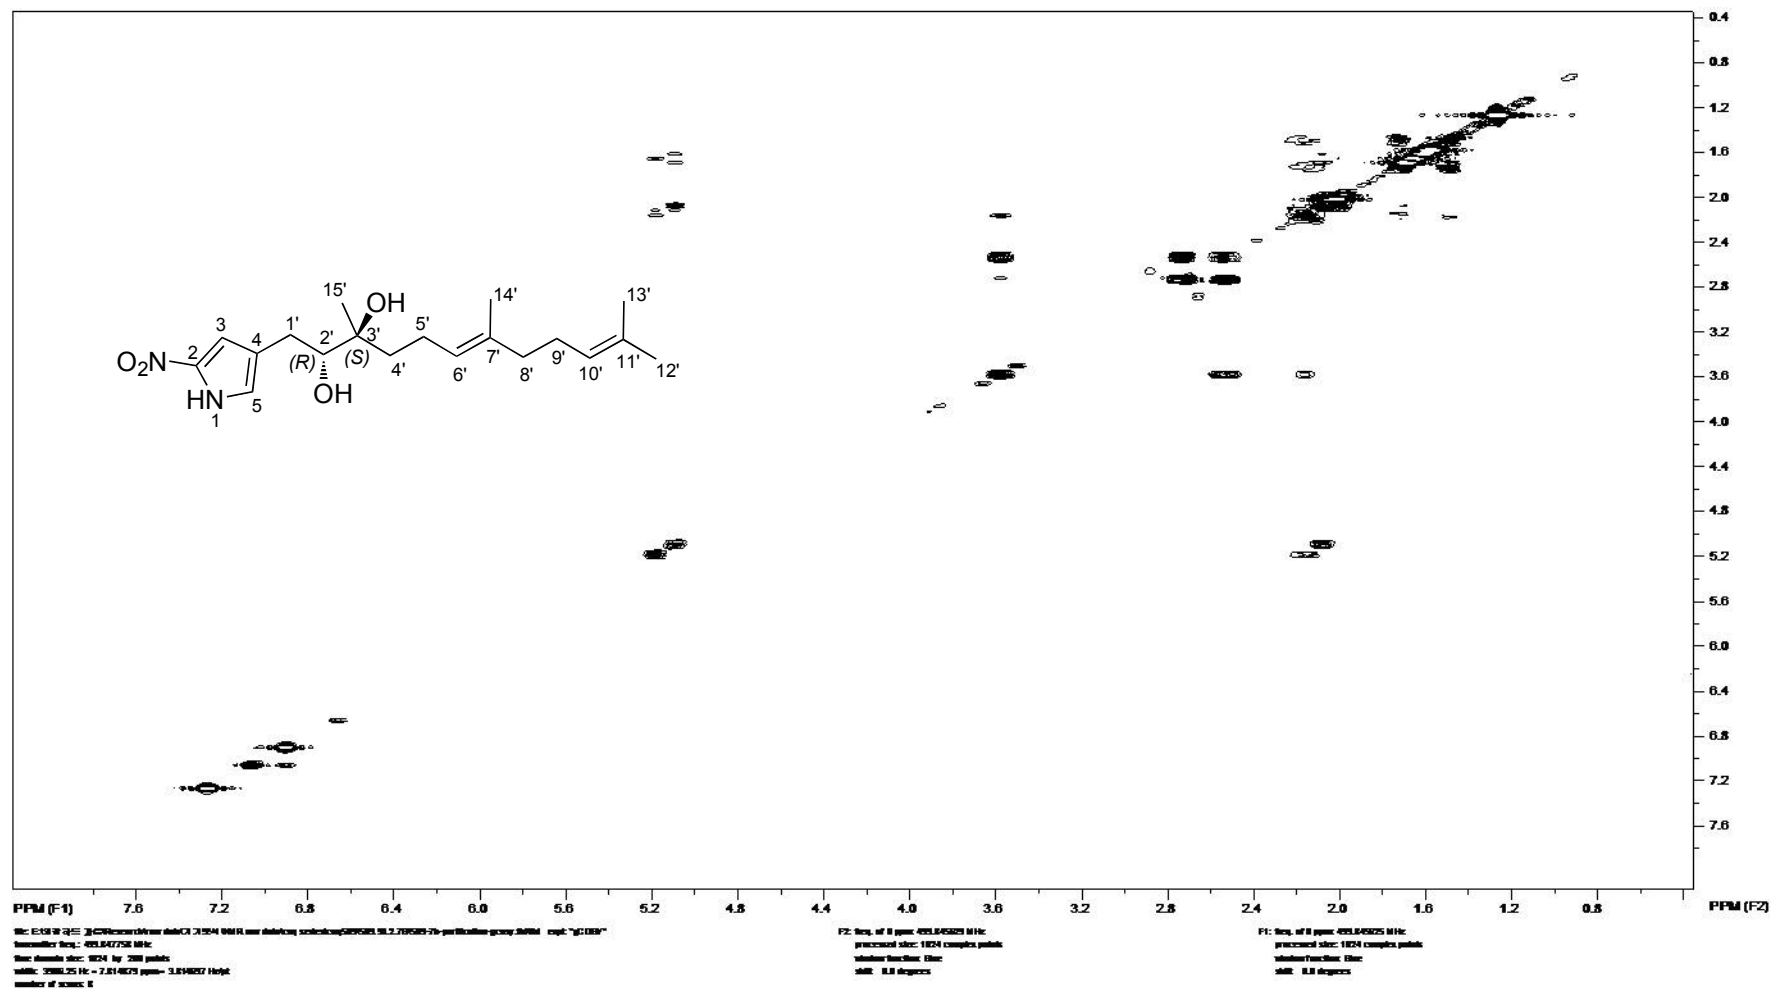

Figure S5 <sup>1</sup>H-<sup>1</sup>H gCOSY spectrum of nitropyrrolin A (**1**) in CDCl<sub>3</sub> (500 MHz).





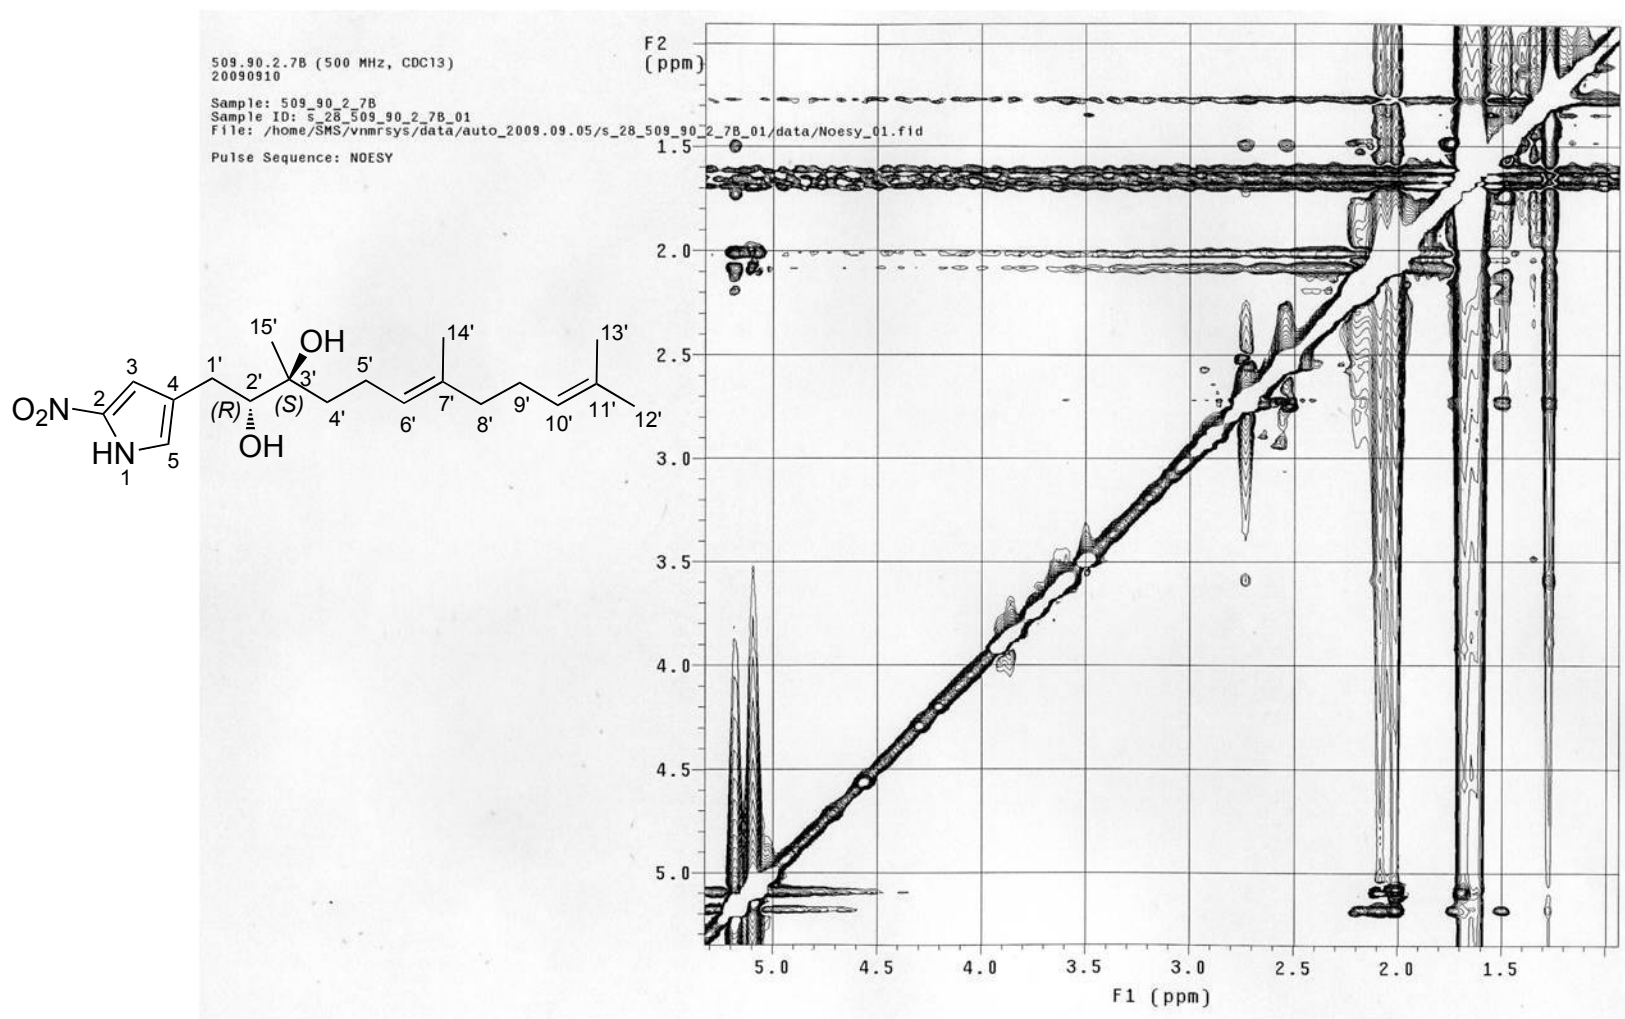

**Figure S8** 2D NOESY spectrum of nitropyrrolin A (**1**) in CDCl<sub>3</sub> (500 MHz).

## UV spectra of nitropyrrolins

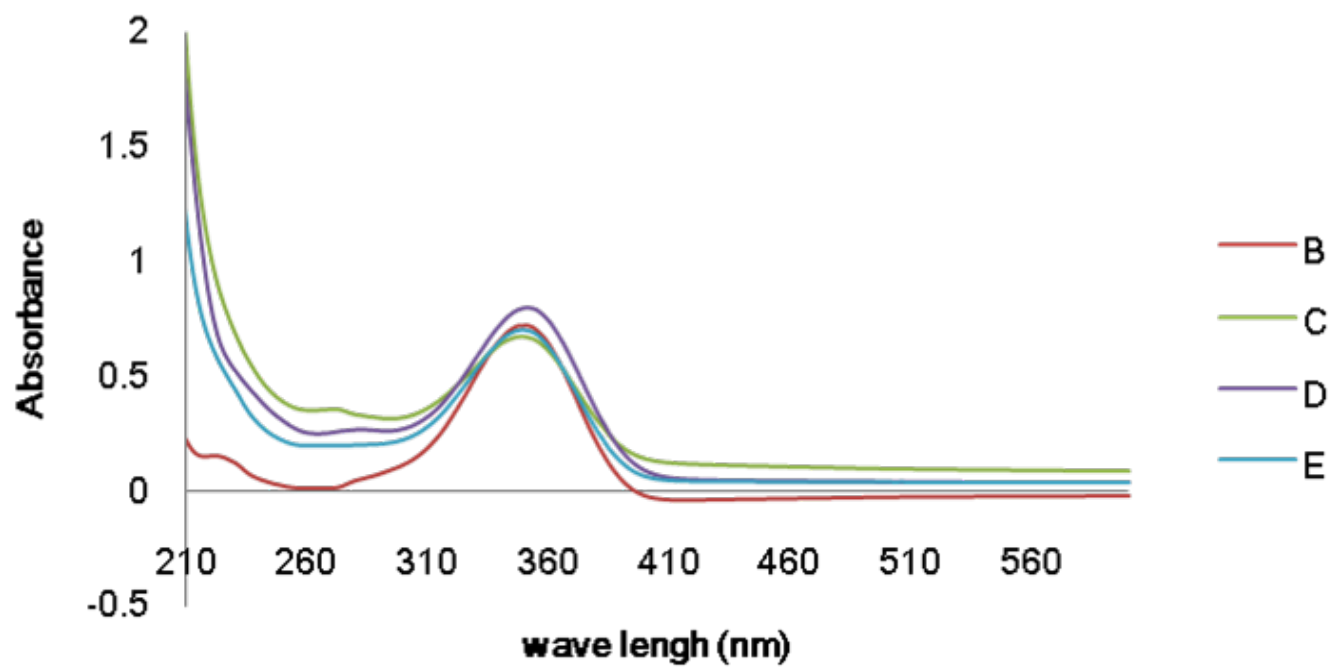

**Figure S9** UV spectra of nitropyrrolins B (2), C (3), D (4) and E (5) in CH<sub>3</sub>OH (10<sup>-4</sup> M).

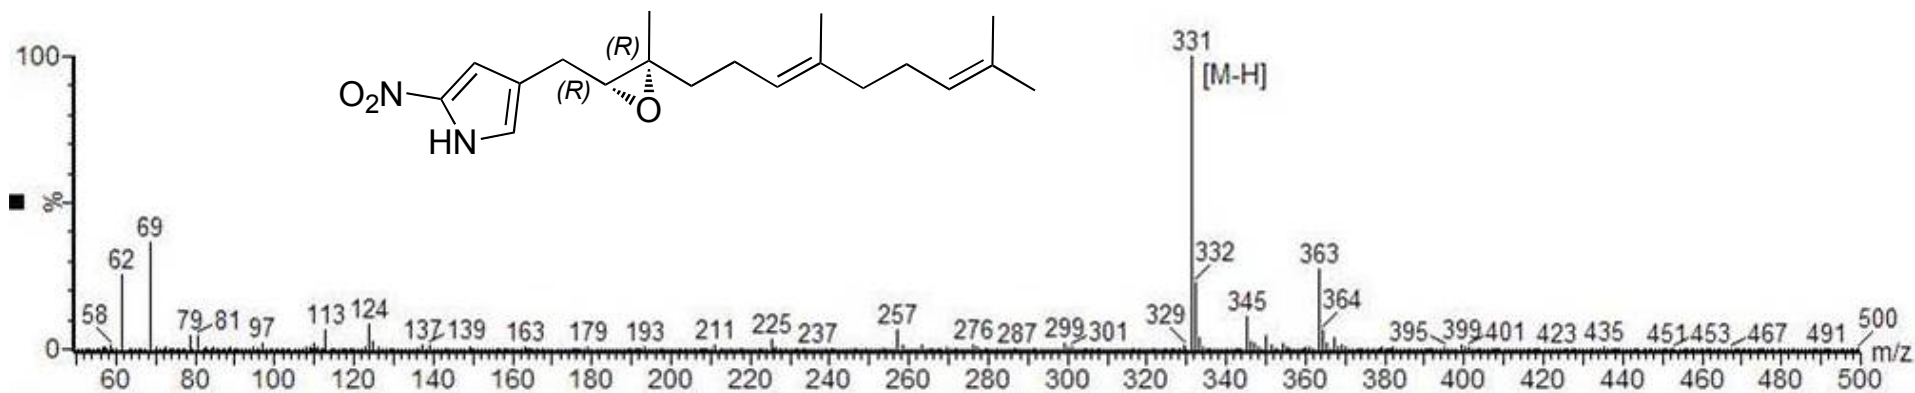

Selected Isotopes :  $C_{0.50}H_{0.100}O_{0.10}N_{0.5}$       Error Limit : 20 ppm

| <u>Measured Mass</u> | <u>% Base</u> | <u>Formula</u>       | <u>Calculated Mass</u> | <u>Error</u> |
|----------------------|---------------|----------------------|------------------------|--------------|
| 331.2029             | 38.2%         | $C_{24}H_{27}O$      | 331.2062               | 9.9          |
|                      |               | $C_{16}H_{29}O_6N$   | 331.1995               | -10.0        |
|                      |               | $C_{19}H_{27}O_3N_2$ | 331.2021               | -2.3         |
|                      |               | $C_{22}H_{25}N_3$    | 331.2048               | 5.8          |
|                      |               | $C_{14}H_{27}O_5N_4$ | 331.1981               | -14.0        |
|                      |               | $C_{17}H_{25}O_2N_5$ | 331.2008               | -6.4         |

Figure S10 MS data of nitropyrrolin B (2) (Upper, positive ESI MS; Middle, negative ESI MS; Bottom, negative HR-FAB MS).

**Table S2.** NMR data for nitropyrrolin B (**2**) in CDCl<sub>3</sub>

| Position | $\delta_{\text{H}}$ mult ( $J$ in Hz)                    | $\delta_{\text{C}}$ | COSY         | HMBC                  | Key NOE |
|----------|----------------------------------------------------------|---------------------|--------------|-----------------------|---------|
| 1        | 9.51, br s                                               | 137.4               |              |                       |         |
| 2        |                                                          |                     |              |                       |         |
| 3        | 7.03, br s                                               | 110.9               | 5            | 2, 4, 5               |         |
| 4        |                                                          | 123.0               |              |                       |         |
| 5        | 6.87, br s                                               | 121.6               | 3, 1'        | 2, 3, 4               |         |
| 1'       | 2.71, dd (15.0, 6.0)<br>2.68, dd (15.0, 6.0)             | 26.7                | 5, 2'        | 2, 3, 5, 2', 3'       |         |
| 2'       | 2.94, dd (6.0, 6.0)                                      | 63.1                | 1'           | 2, 1', 4'             | 4', 15' |
| 3'       |                                                          | 61.5                |              |                       |         |
| 4'       | 1.70, ddd (13.5, 8.0, 6.0)<br>1.49, ddd (13.5, 9.5, 6.5) | 38.6                | 5'           |                       | 2'      |
| 5'       | 2.11, m                                                  | 23.7                | 4', 6'       | 4', 6'                |         |
| 6'       | 5.08, m <sup>a</sup>                                     | 123.3               | 5', 14'      | 5', 14'               |         |
| 7'       |                                                          | 135.8               |              |                       |         |
| 8'       | 2.05, m                                                  | 26.7                | 9', 10'      | 7', 9', 10'           |         |
| 9'       | 1.96, br dd (8.0, 7.0)                                   | 39.7                | 8', 10'      | 7', 8', 10', 11', 13' |         |
| 10'      | 5.08, m <sup>a</sup>                                     | 124.2               | 9', 12', 13' | 9', 12'               |         |
| 11'      |                                                          | 131.6               |              |                       |         |
| 12'      | 1.68, br d (1.0)                                         | 25.8                | 10'          | 10', 11', 13'         |         |
| 13'      | 1.60, s                                                  | 17.8                | 10'          | 9', 10', 11', 12'     |         |
| 14'      | 1.60, s                                                  | 16.1                | 6'           | 6', 7'                |         |
| 15'      | 1.38, s                                                  | 16.8                |              | 2', 3', 4'            | 2'      |

<sup>a</sup> The multiplicity of this signal was unresolved due to peak overlapping and the chemical shift was assigned by interpretation of HSQC and HMBC spectroscopic data.



SpinWorks 2.5: 509-90-2-1B-m (500 MHz, CDCl3)

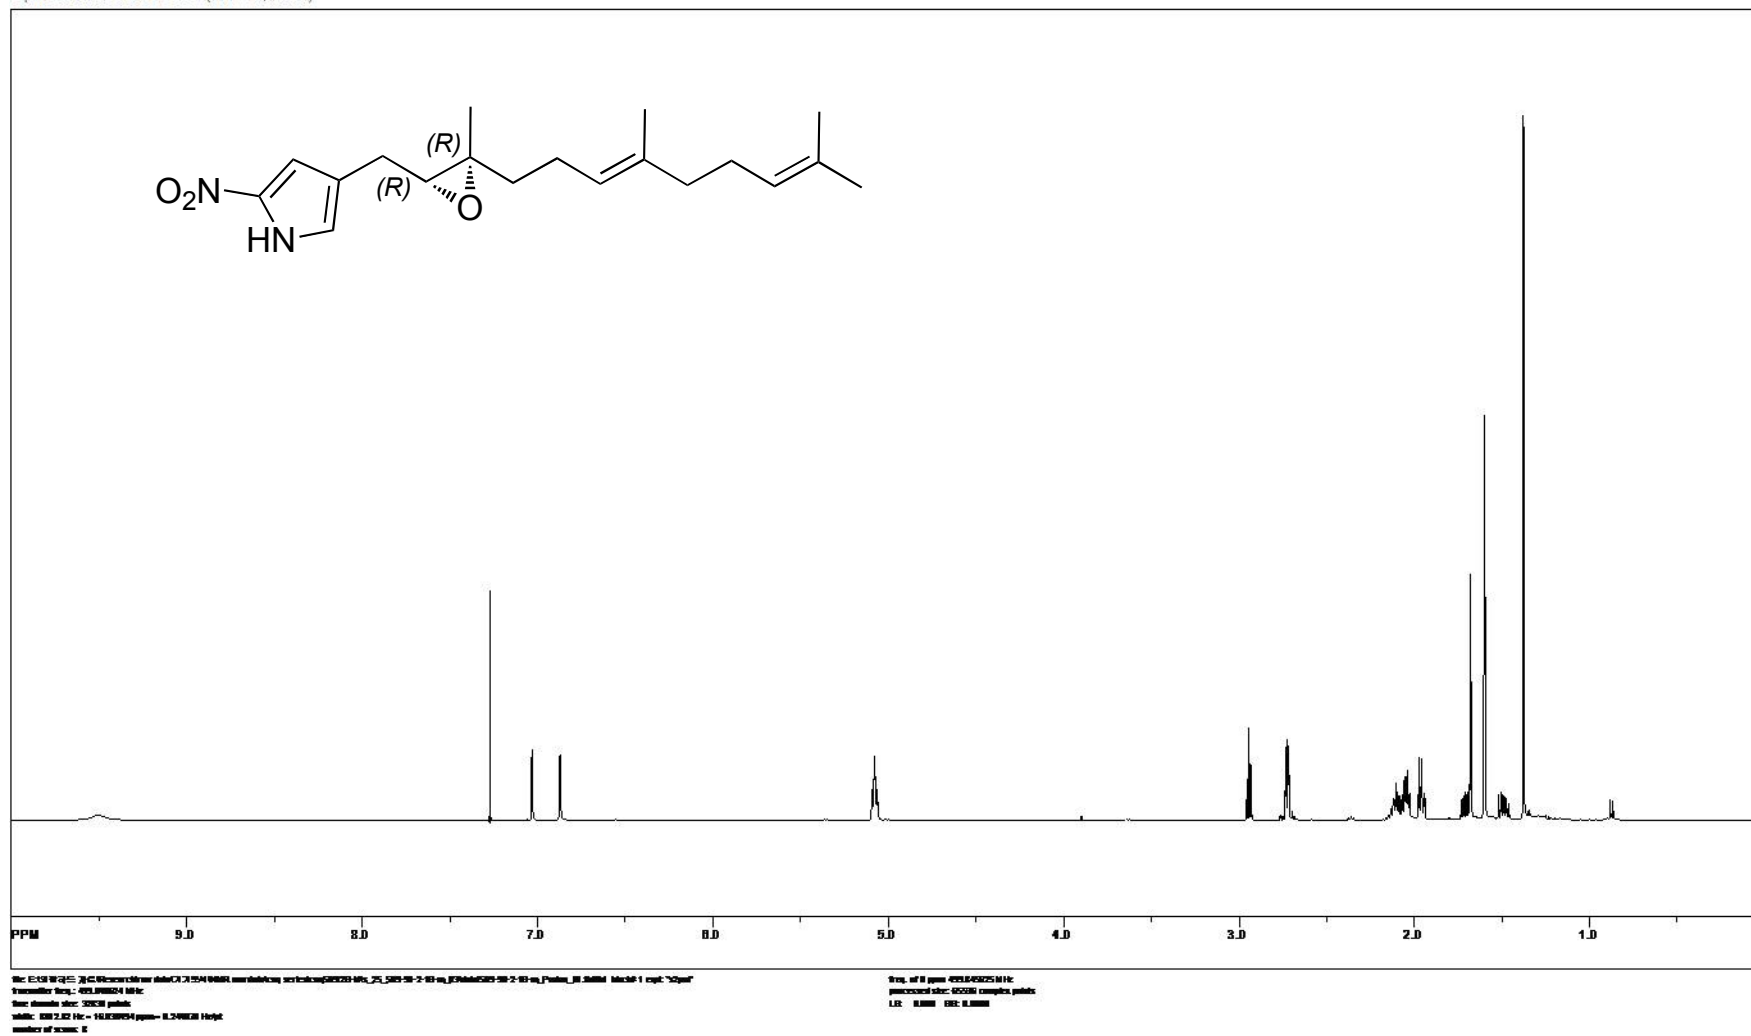

Figure S11 <sup>1</sup>H NMR spectrum of nitropyrrolin B (2) in CDCl<sub>3</sub> (500 MHz).

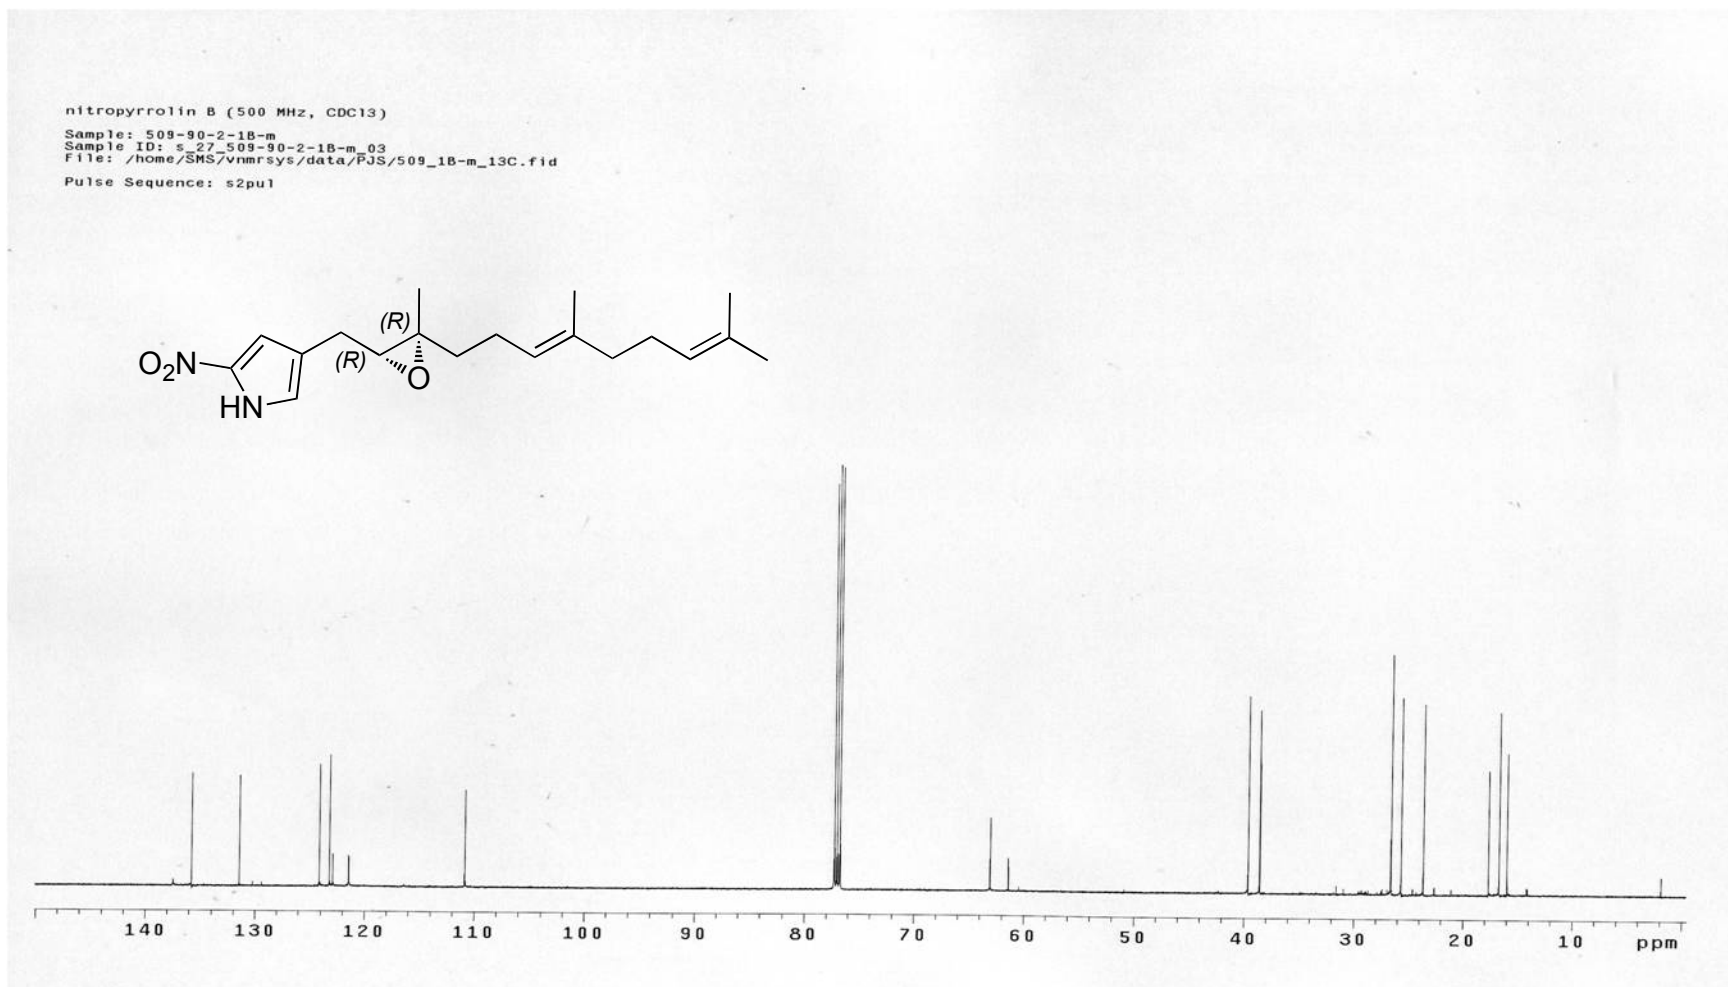

**Figure S12** <sup>13</sup>C NMR spectrum of nitropyrrolin B (**2**) in CDCl<sub>3</sub> (125 MHz).



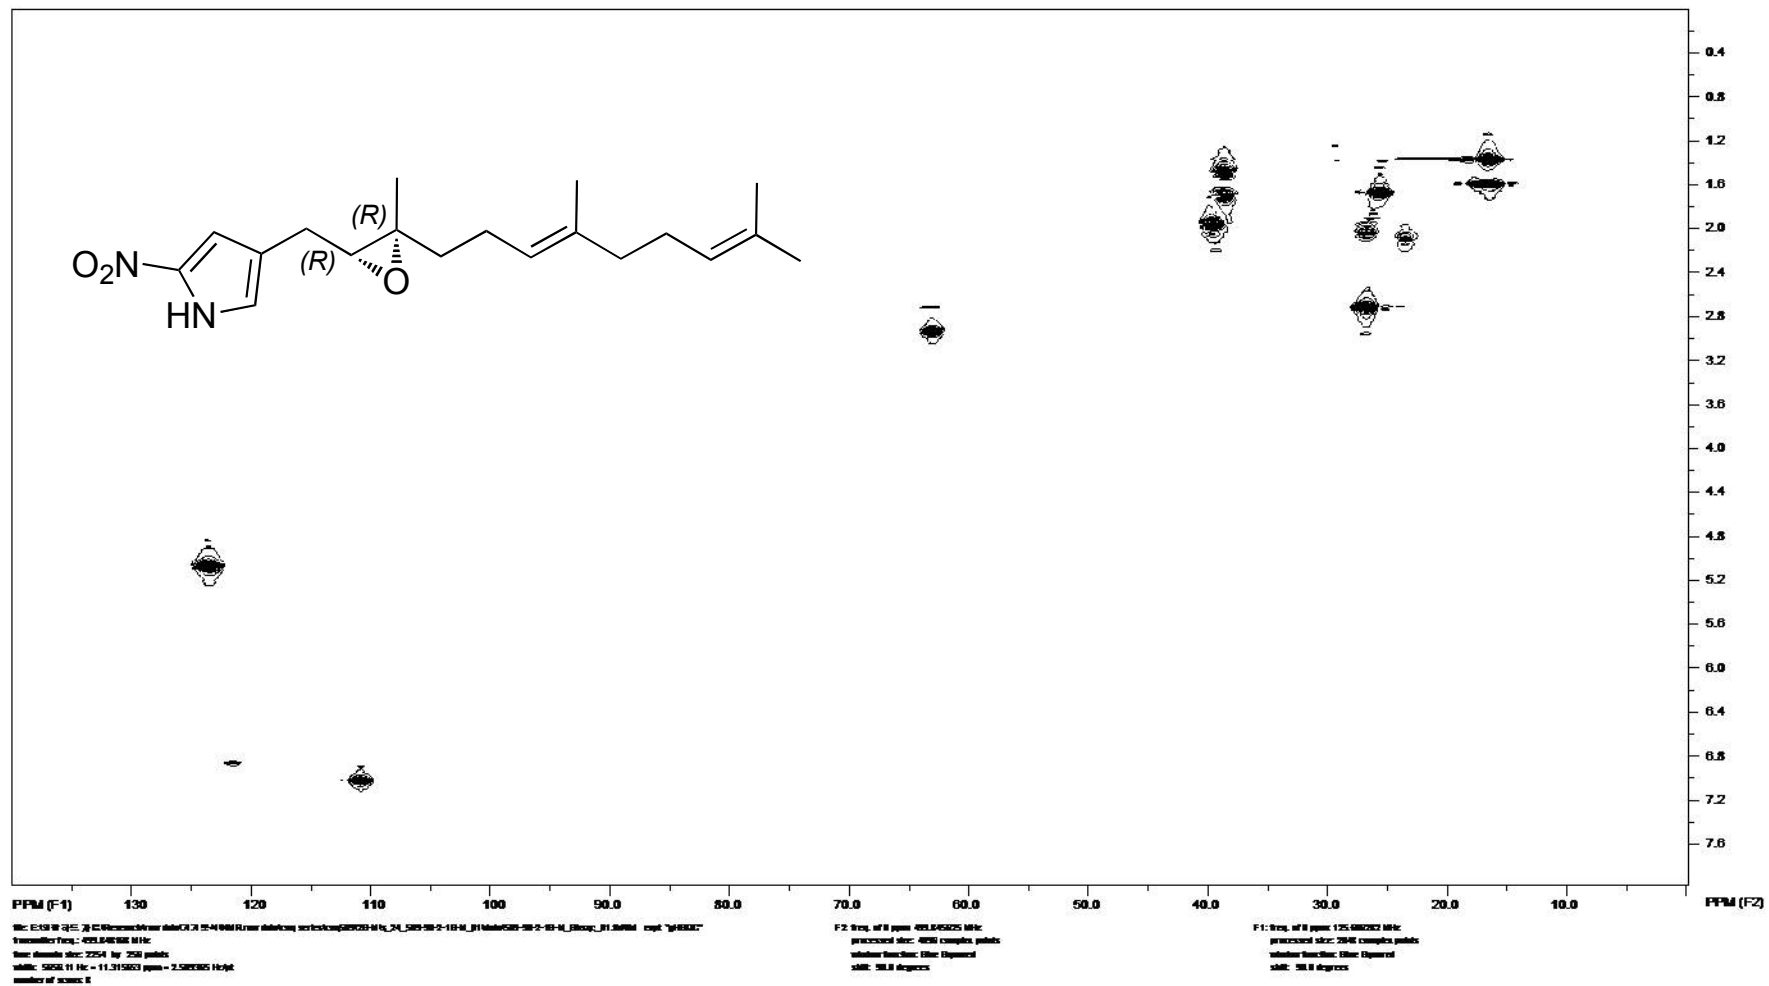

Figure S14 gHSQC spectrum of nitropyrrolin B (2) in CDCl<sub>3</sub> (500 MHz).

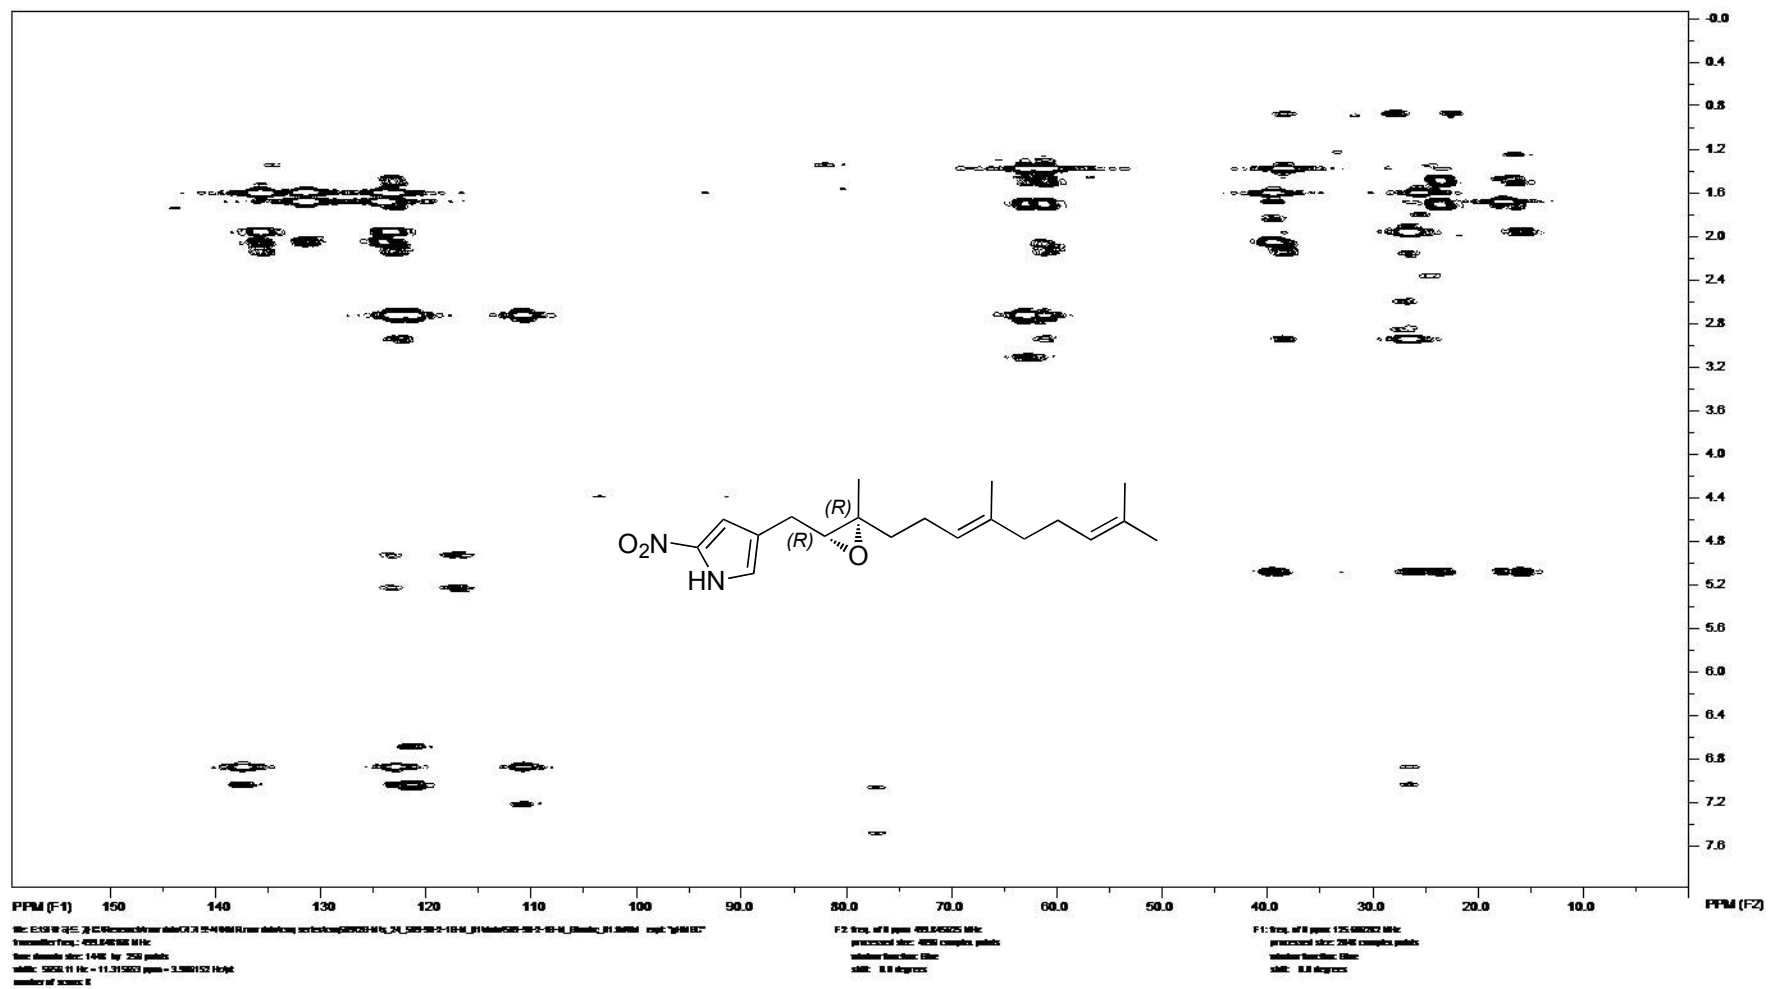

Figure S15 gHMBC spectrum of nitropyrrolin B (2) in CDCl<sub>3</sub> (500 MHz).

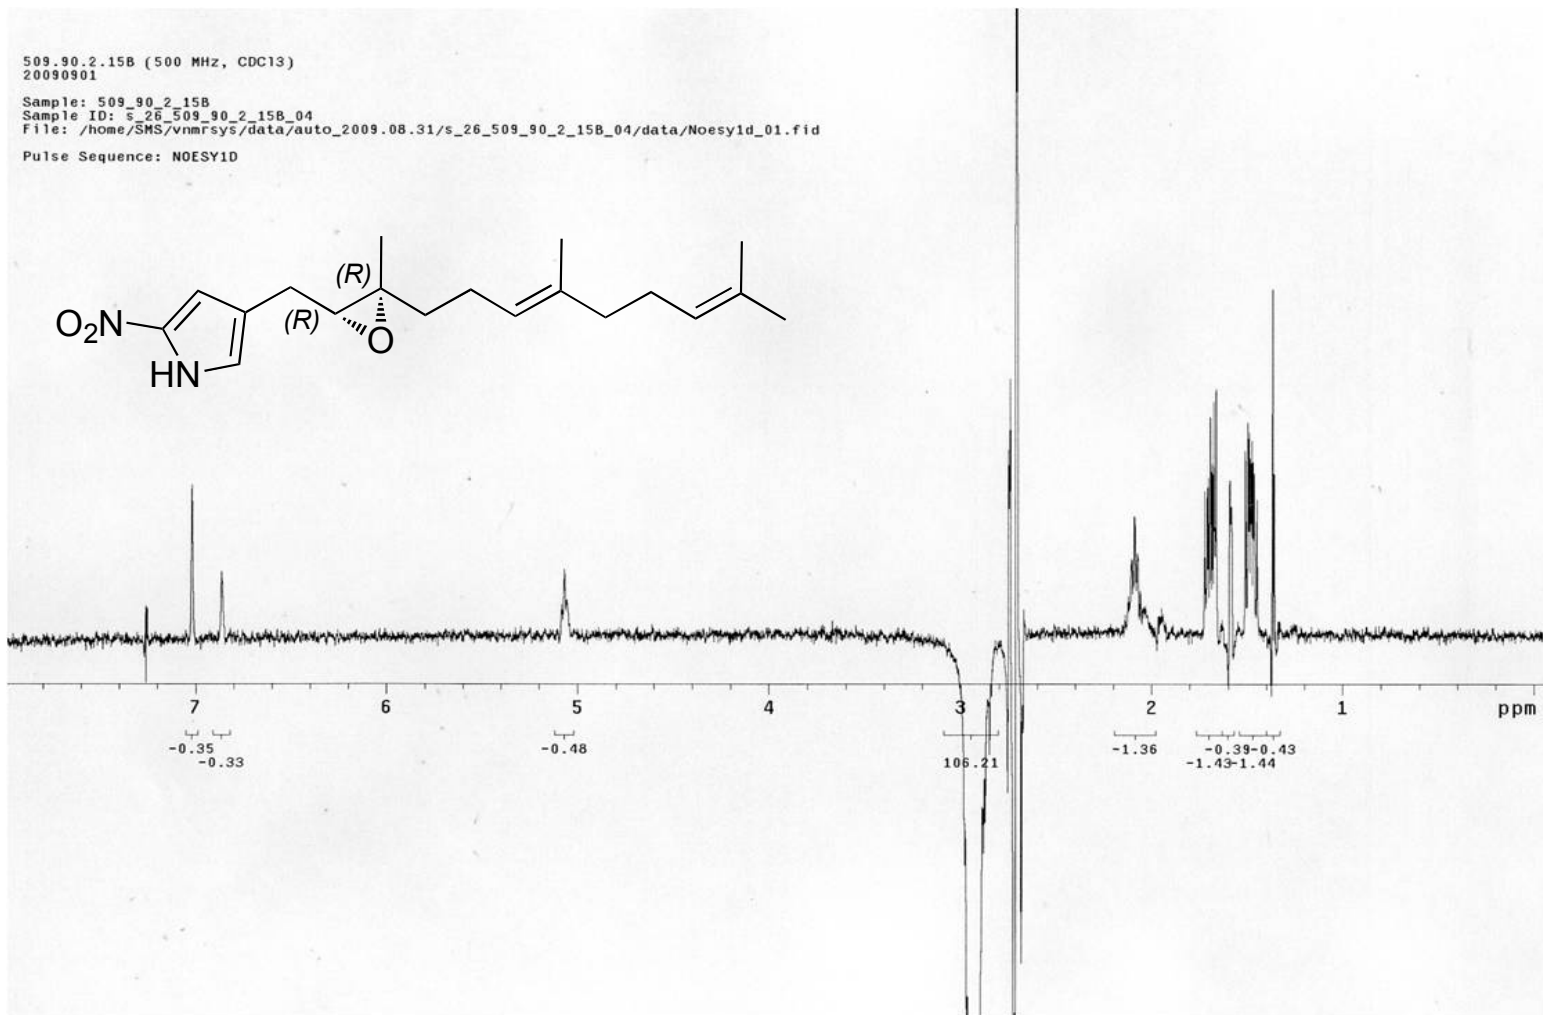

**Figure S16** Selective 1D NOESY spectrum of nitropyrrolin B (**2**) in CDCl<sub>3</sub> (500 MHz), irradiation of H-2' signal at  $d_H$  2.94

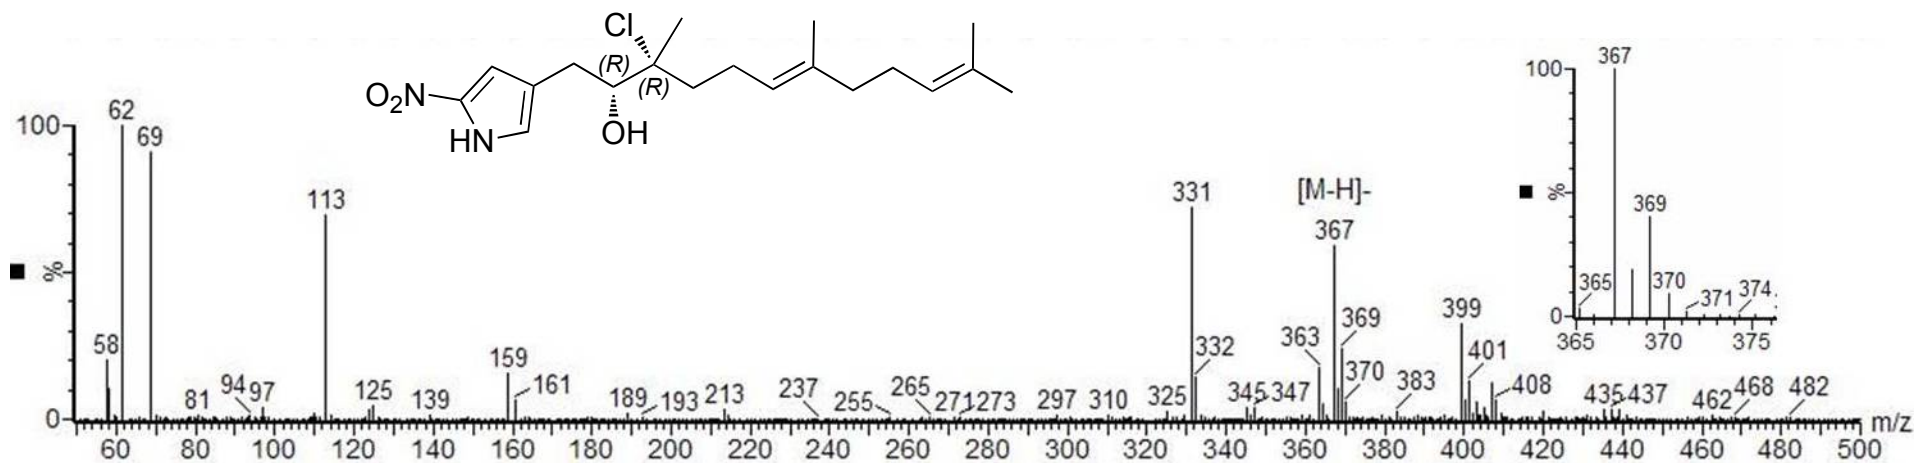

Selected Isotopes :  $H_{0.50}C_{0.50}N_{0.5}O_{0.5}Cl_{0.2}^{37}Cl_{0.2}$  Error Limit : 20 ppm

| <u>Measured Mass</u> | <u>% Base</u> | <u>Formula</u>         | <u>Calculated Mass</u> | <u>Error</u> |
|----------------------|---------------|------------------------|------------------------|--------------|
| 367.1791             | 43.5%         | $C_{23}H_{21}N_5$      | 367.1797               | 1.6          |
|                      |               | $C_{25}H_{23}N_2O$     | 367.1810               | 5.2          |
|                      |               | $C_{20}H_{23}N_4O_3$   | 367.1770               | -5.8         |
|                      |               | $C_{22}H_{25}N_4O_4$   | 367.1783               | -2.1         |
|                      |               | $C_{16}H_{25}N_5O_5$   | 367.1855               | 17.0         |
|                      |               | $C_{22}H_{26}N_3Cl$    | 367.1815               | 6.6          |
|                      |               | $C_{24}H_{28}OCl$      | 367.1829               | 10.0         |
|                      |               | $C_{17}H_{26}N_5O_2Cl$ | 367.1775               | -4.4         |
|                      |               | $C_{19}H_{28}N_2O_3Cl$ | 367.1788               | -0.8         |
|                      |               | $C_{14}H_{28}N_4O_5Cl$ | 367.1748               | -12.0        |
|                      |               | $C_{21}H_{31}NCl_2$    | 367.1833               | 12.0         |

Figure S17 MS data of nitropyrrolin C (3). (Upper, negative ESI MS; Bottom, negative HR-FAB MS)

**Table S3.** NMR data for nitropyrrolin C (**3**) in CDCl<sub>3</sub>

| Position | $\delta_{\text{H}}$ mult ( <i>J</i> in Hz)    | $\delta_{\text{C}}$ | COSY         | HMBC              | Key NOE <sup>a</sup> |
|----------|-----------------------------------------------|---------------------|--------------|-------------------|----------------------|
| 1        | 9.48, br s                                    |                     | 5            |                   |                      |
| 2        |                                               | 137.5               |              |                   |                      |
| 3        | 7.07, br s                                    | 111.3               | 5            | 2, 4, 5           |                      |
| 4        |                                               | 124.0               |              |                   |                      |
| 5        | 6.92, br s                                    | 122.2               | 1, 3         | 2, 3, 4           |                      |
| 1'       | 2.93, dd (15.0, 1.5)<br>2.60, dd (15.0, 10.5) | 29.2                | 2'           | 3, 4, 5, 2'       | 15'                  |
| 2'       | 3.75, dd (10.5, 1.5)                          | 78.4                | 1'           | 4, 5, 1', 4', 15' | 4', 15'              |
| 3'       |                                               | 78.0                |              |                   |                      |
| 4'       | 2.00, m<br>1.75, ddd (14.0, 11.0, 5.0)        | 39.6                | 5', 6'       | 3'                | 2'                   |
| 5'       | 2.28, m<br>2.19, m                            | 23.0                | 4', 6'       | 4', 6', 7'        |                      |
| 6'       | 5.15, td (7.0, 1.0)                           | 123.0               | 5', 8', 14'  | 4', 5', 14'       |                      |
| 7'       |                                               | 136.3               |              |                   |                      |
| 8'       | 1.99, m                                       | 39.7                | 9', 10'      |                   |                      |
| 9'       | 2.08, dd (7.5, 7.5)                           | 26.6                | 8', 10'      |                   |                      |
| 10'      | 5.09, tq (7.0, 1.5)                           | 124.1               | 9', 12', 13' | 9', 13'           |                      |
| 11'      |                                               | 131.5               |              |                   |                      |
| 12'      | 1.69, s                                       | 25.7                | 10'          | 10', 11', 13'     |                      |
| 13'      | 1.61, s                                       | 17.7                | 10'          | 10', 11', 12'     |                      |
| 14'      | 1.63, s                                       | 16.1                | 6'           | 6', 7', 8'        |                      |
| 15'      | 1.64, s                                       | 25.6                |              |                   | 1', 2'               |

<sup>a</sup>NOE data was recorded in DMSO-*d*<sub>6</sub>





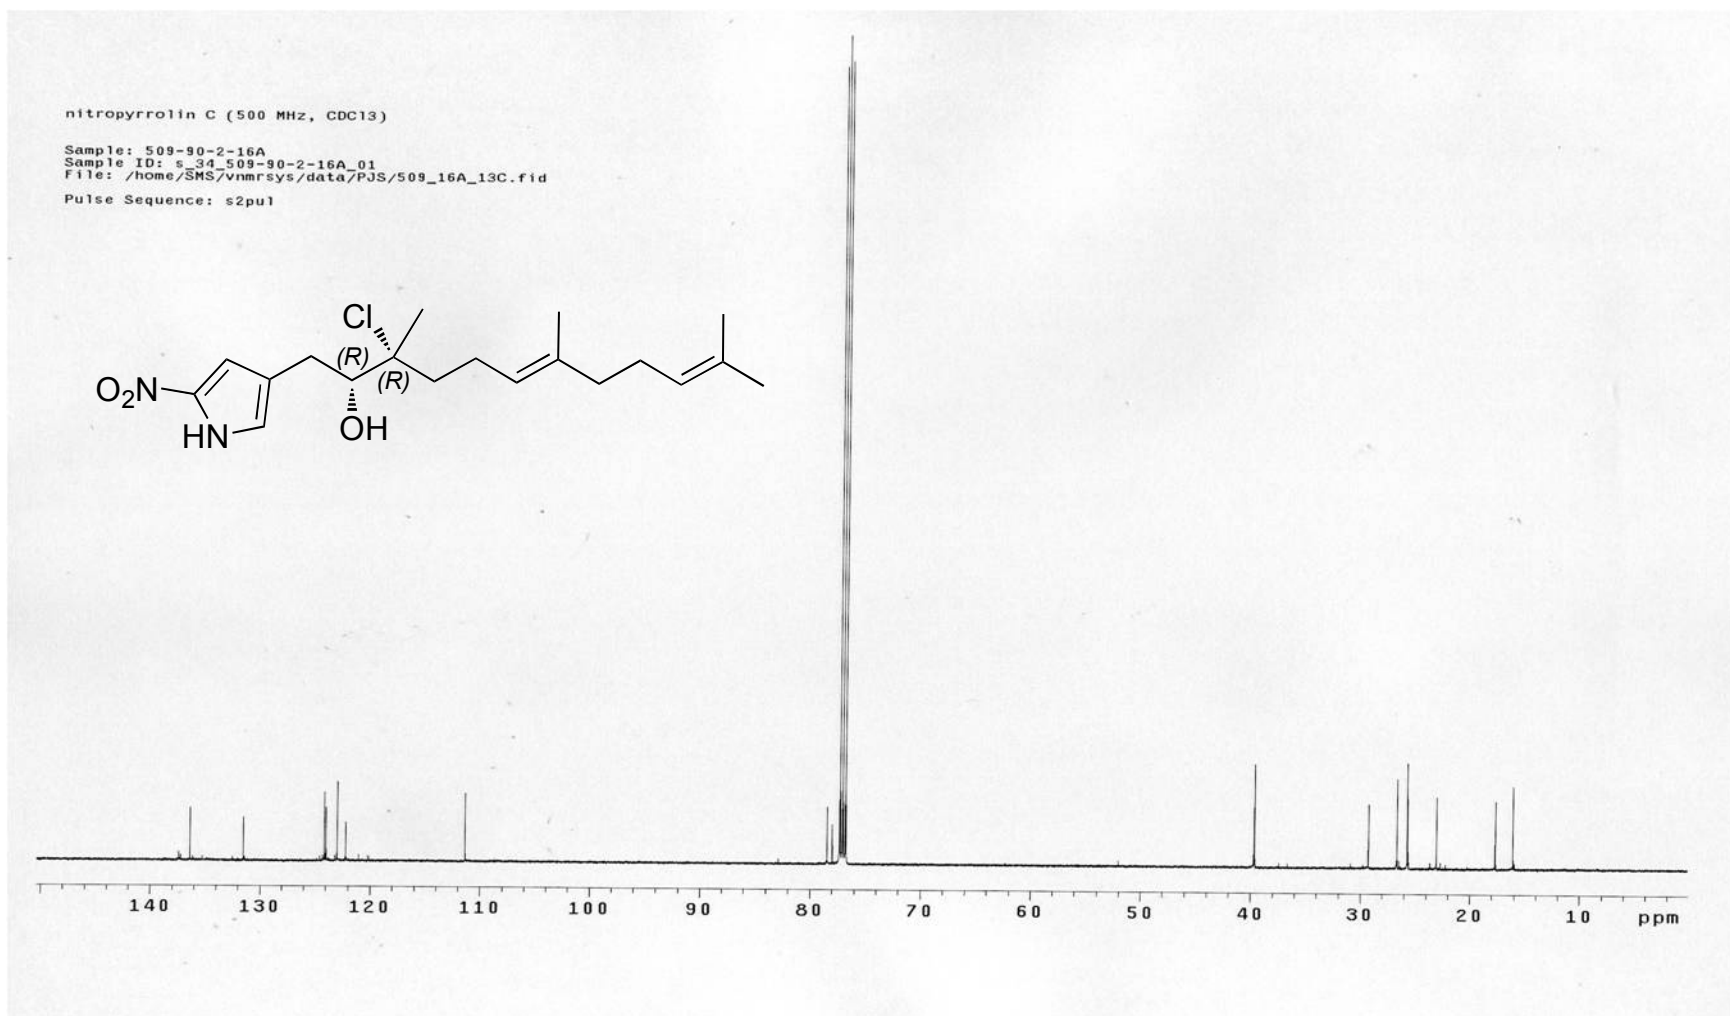

**Figure S19** <sup>13</sup>C NMR spectrum of nitropyrrolin C (**3**) in CDCl<sub>3</sub> (125 MHz).

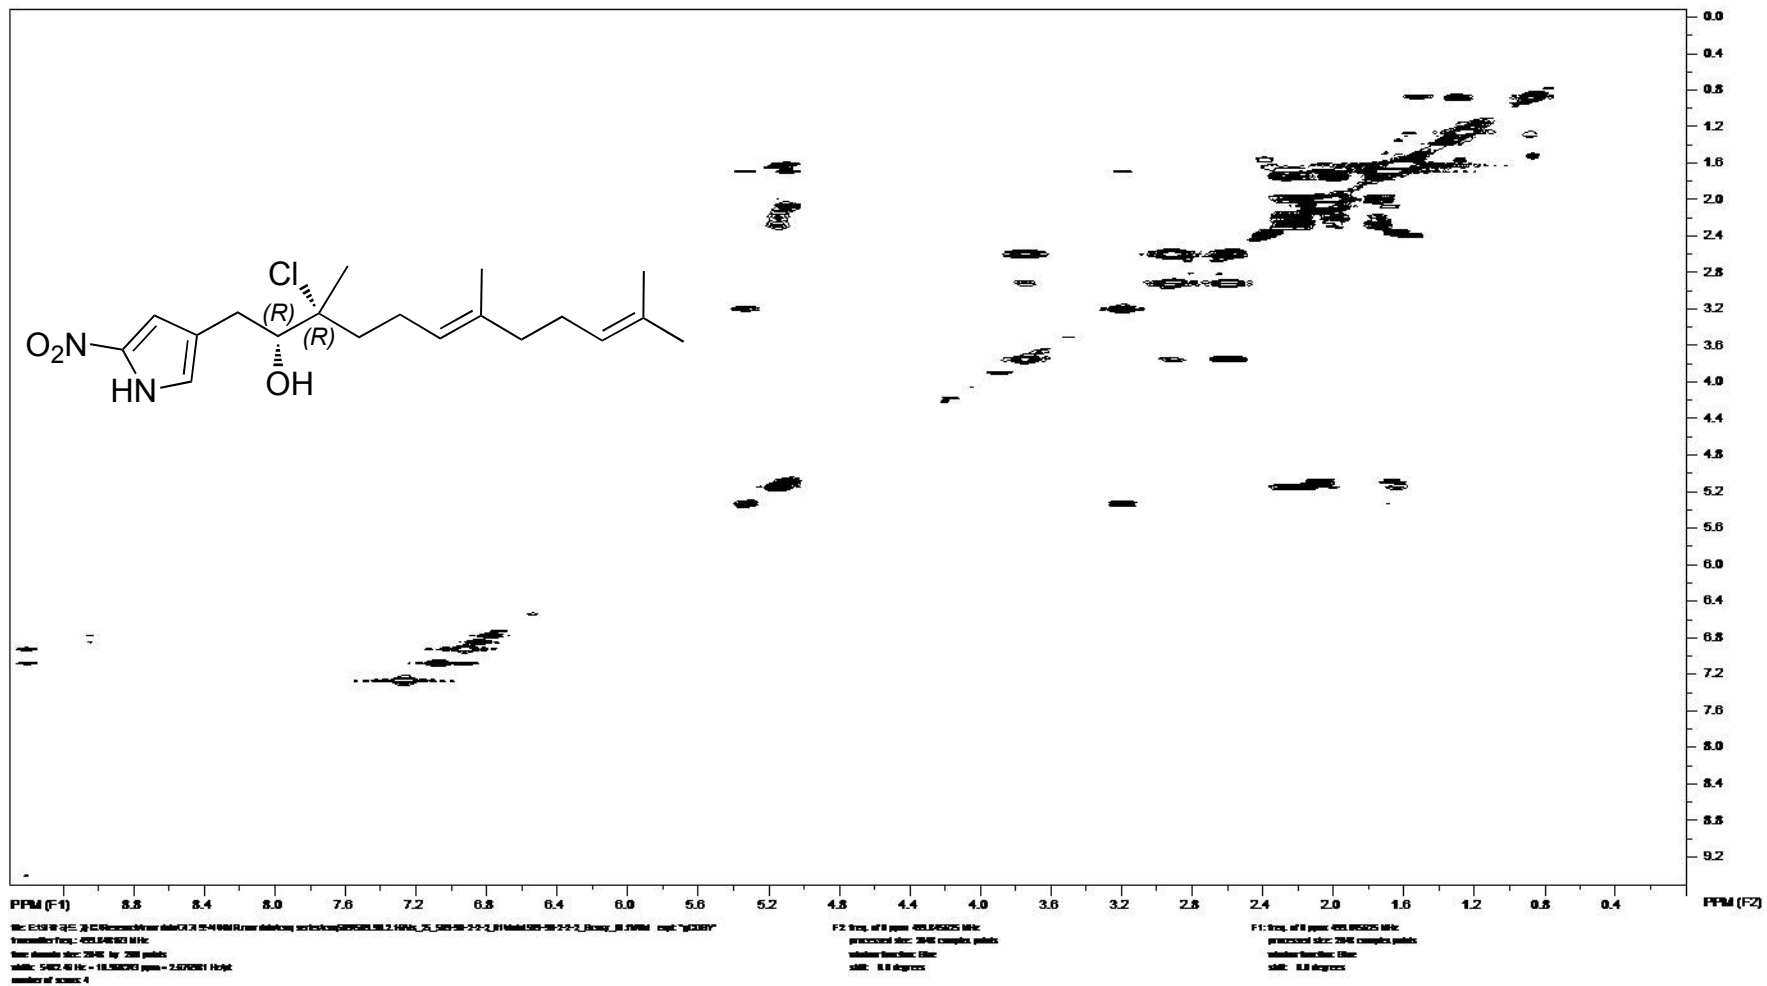

Figure S20  $^1\text{H}$ - $^1\text{H}$  gCOSY spectrum of nitropyrrolin C (**3**) in  $\text{CDCl}_3$  (500 MHz).

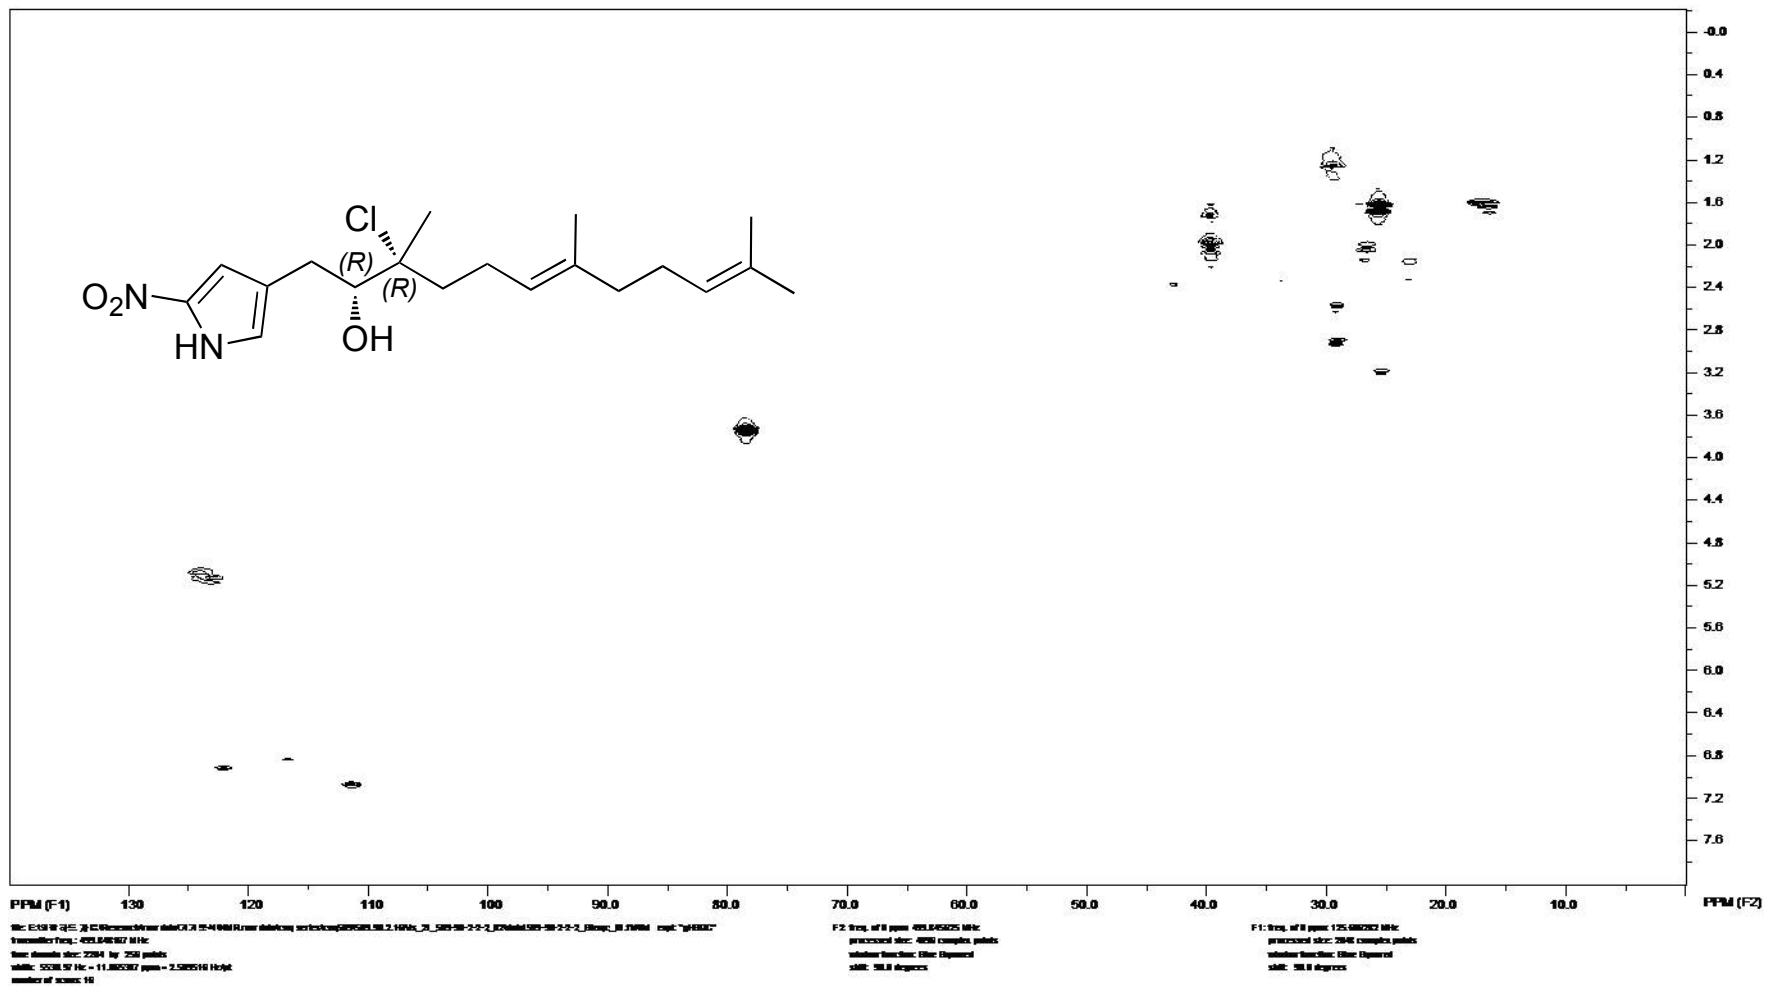

Figure S21 gHSQC spectrum of nitropyrrolin C (**3**) in CDCl<sub>3</sub> (500 MHz).

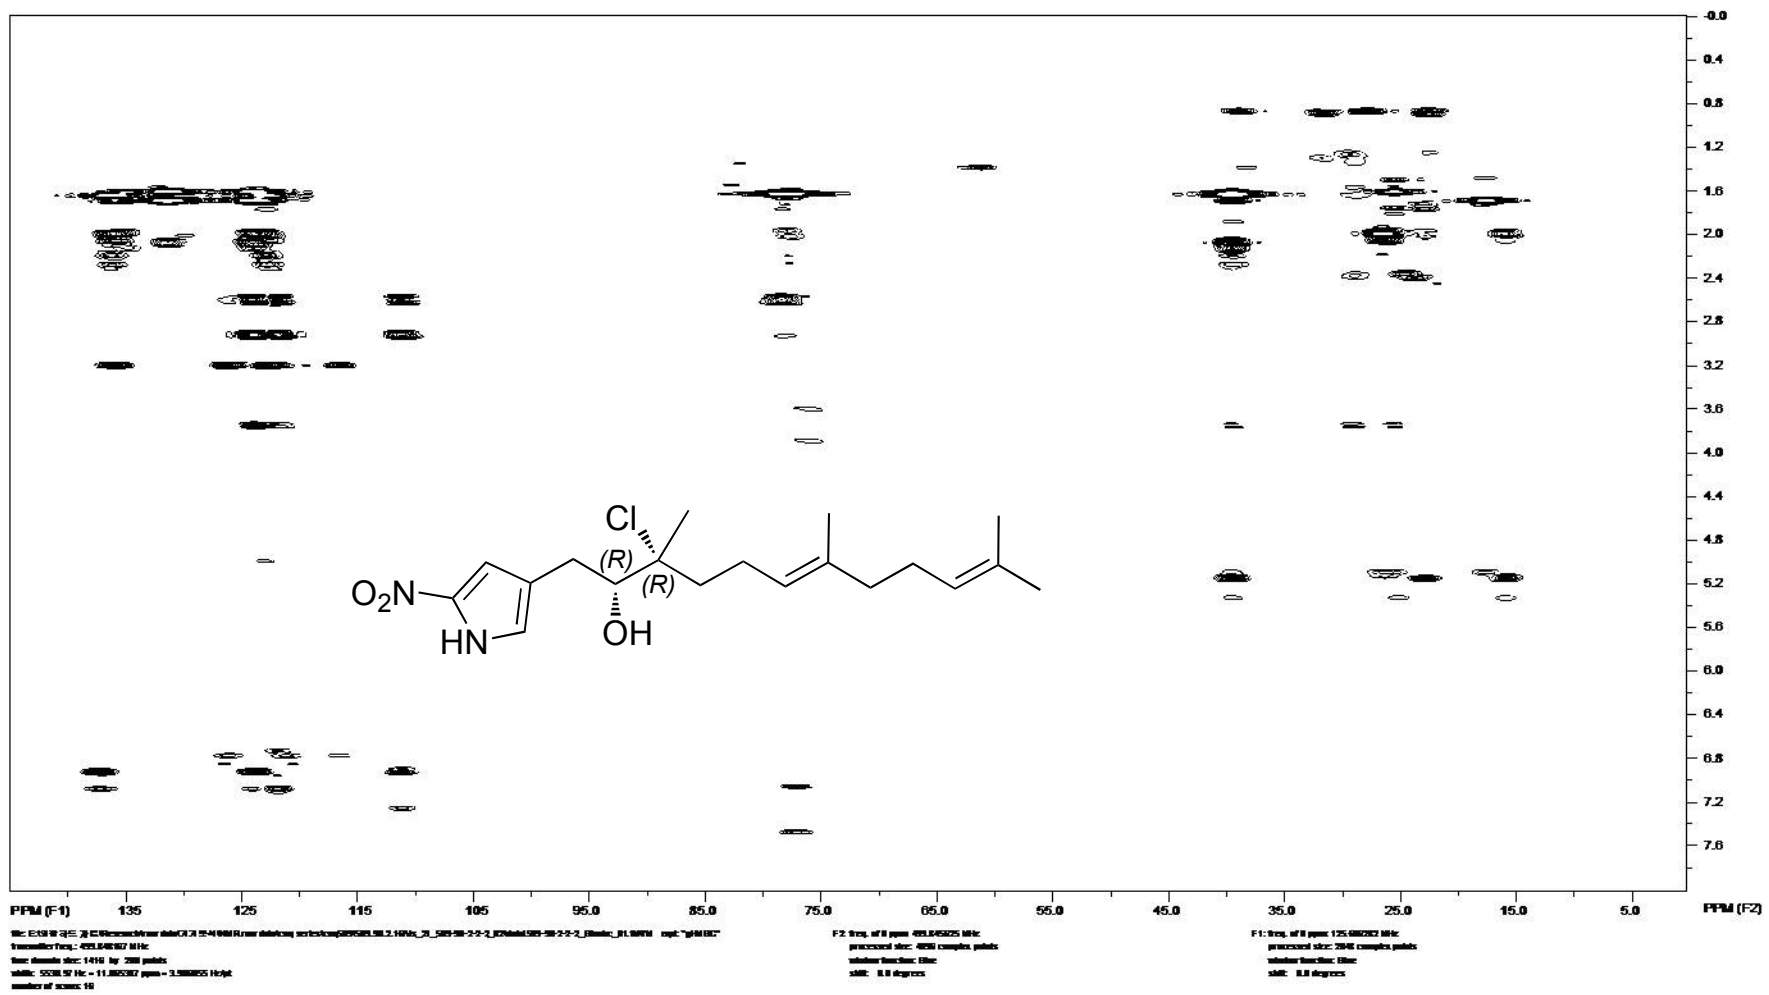

**Figure S22** gHMBC spectrum of nitropyrrolin C (**3**) in CDCl<sub>3</sub> (500 MHz).

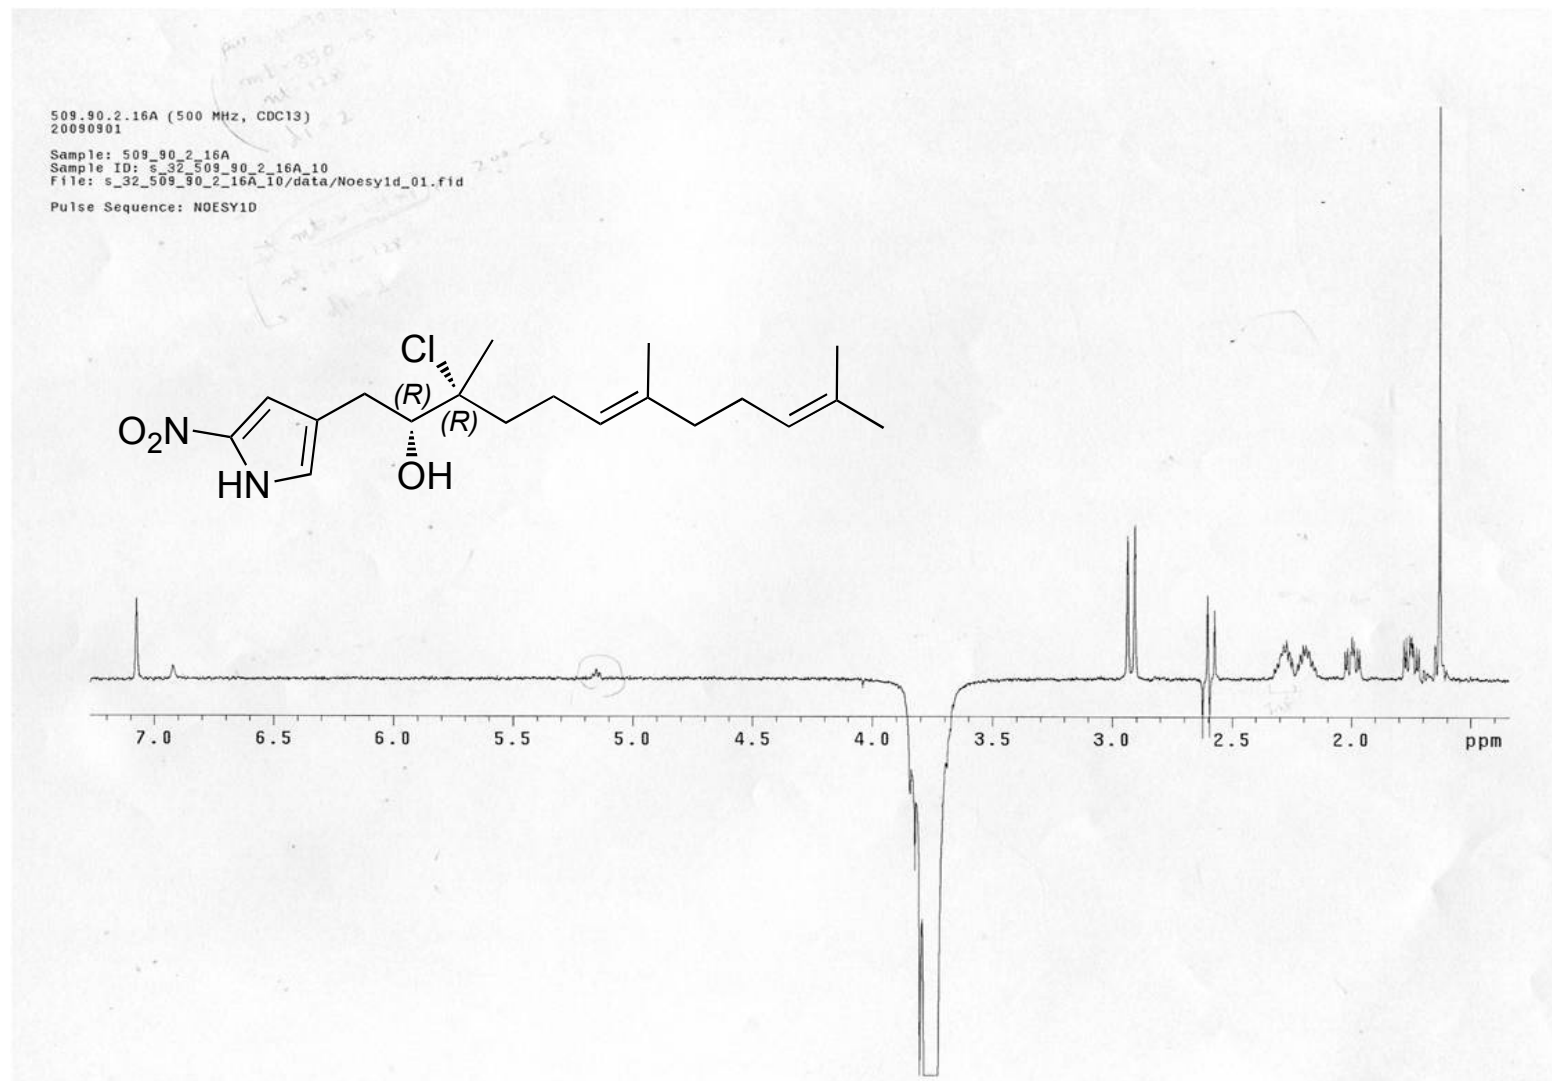

**Figure S23** Selective 1D NOESY spectrum of nitropyrrolin C (**3**) in CDCl<sub>3</sub> (500 MHz), irradiation of H-2' signal at  $\delta_{\text{H}}$  3.75.

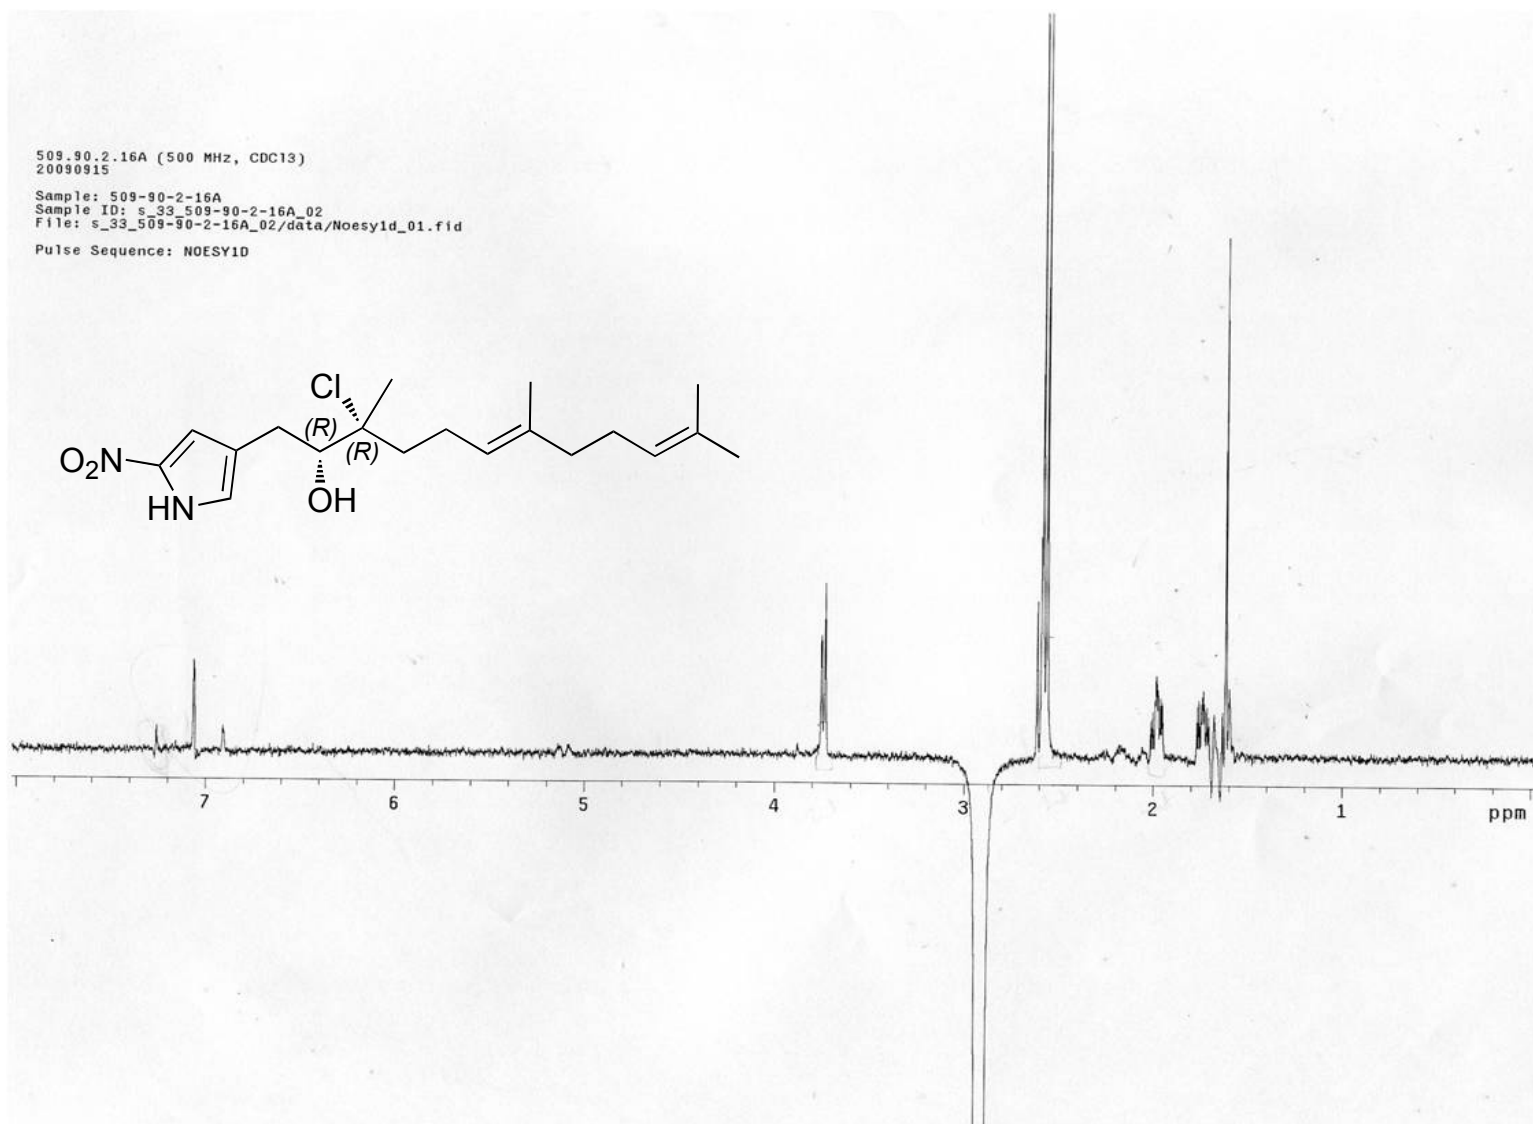

**Figure S24** Selective 1D NOESY spectrum of nitropyrrolin C (**3**) in CDCl<sub>3</sub> (500 MHz), irradiation of H<sub>2</sub>-1'a signal at  $\delta_{\text{H}}$  2.93.

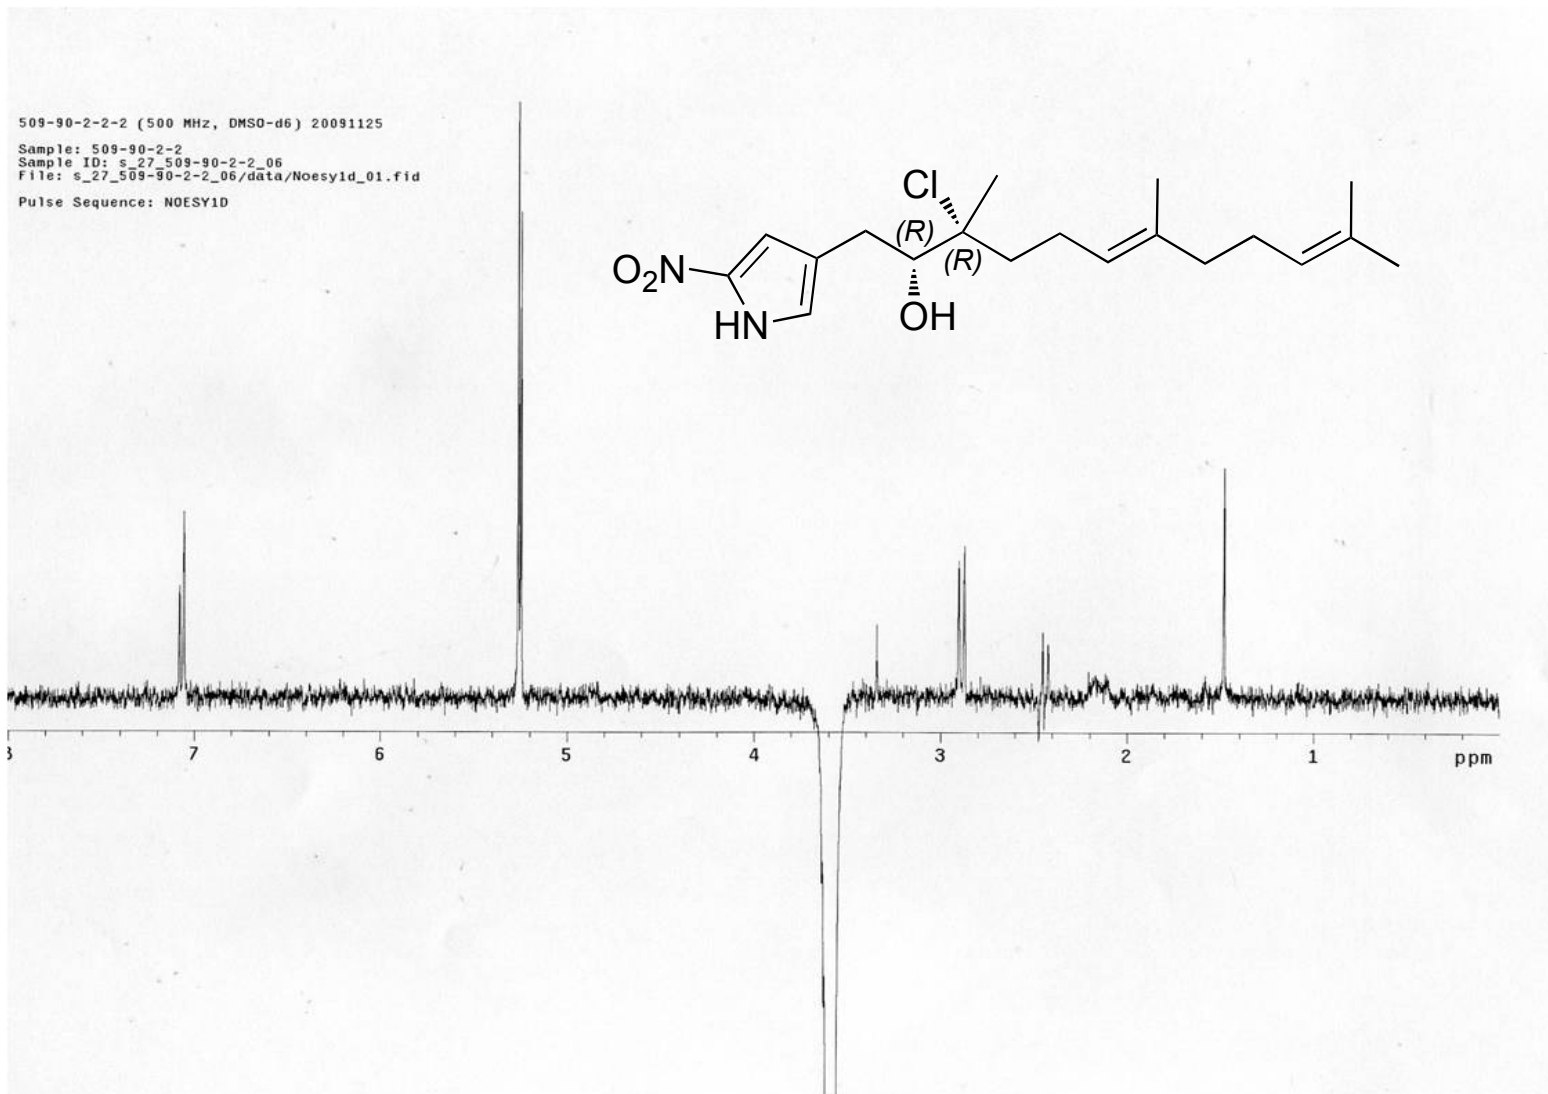

**Figure S25** Selective 1D NOESY spectrum of nitropyrrolin C (**3**) in DMSO-*d*<sub>6</sub> (500 MHz), irradiation of H-2' signal



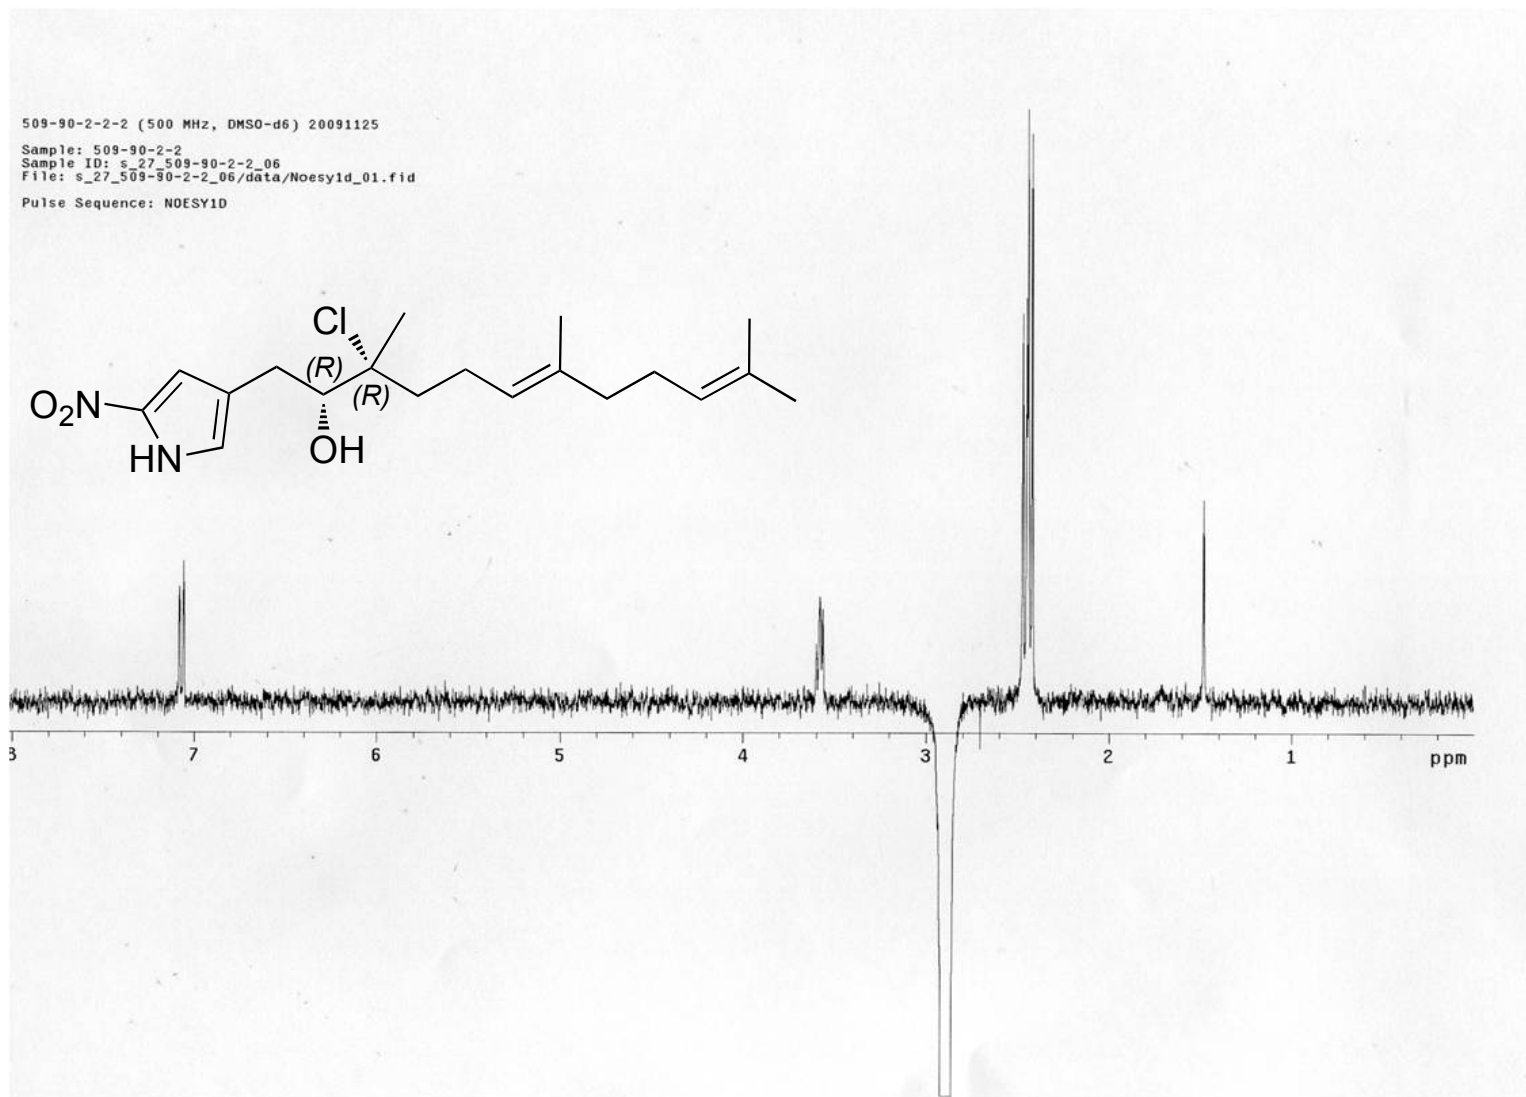

**Figure S26** Selective 1D NOESY spectrum of nitropyrrolin C (**3**) in DMSO-*d*<sub>6</sub> (500 MHz), irradiation of H-1'a signal

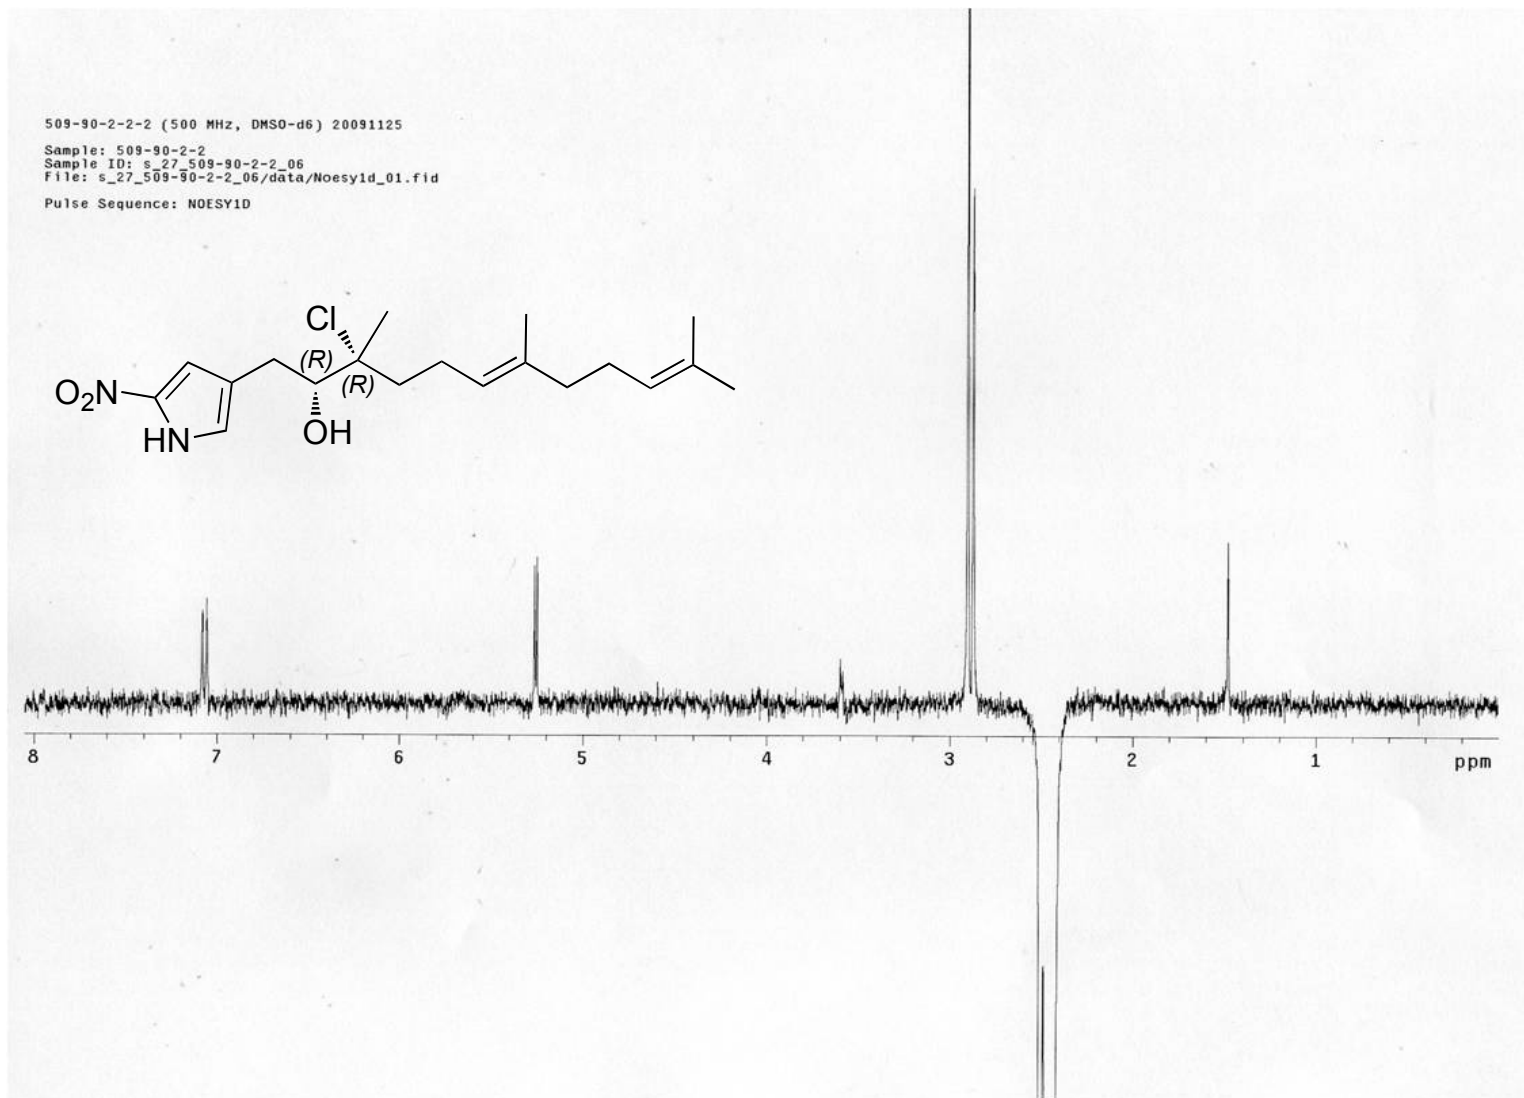

**Figure S27** Selective 1D NOESY spectrum of nitropyrrolin C (**3**) in DMSO-*d*<sub>6</sub> (500 MHz), irradiation of H-1'b signal

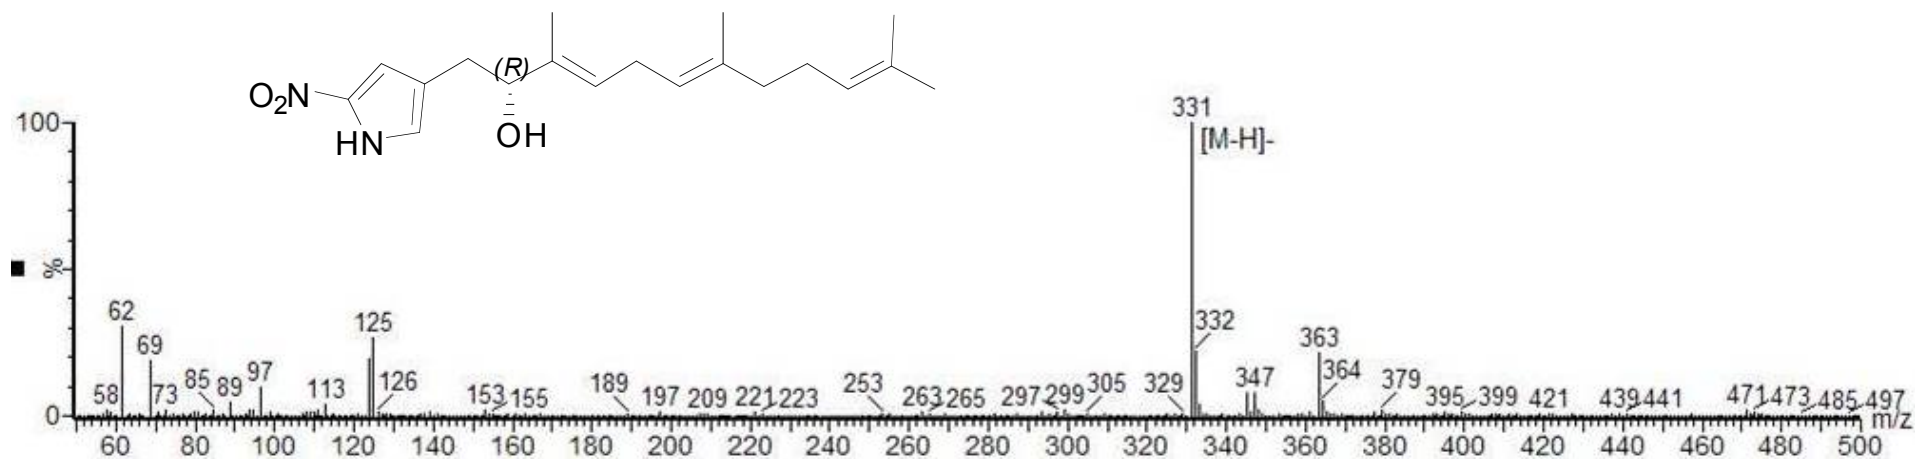

Selected Isotopes :  $C_{0.50}H_{0.100}O_{0.10}N_{0.5}$       Error Limit : 20 ppm

| <u>Measured Mass</u> | <u>% Base</u> | <u>Formula</u>       | <u>Calculated Mass</u> | <u>Error</u> |
|----------------------|---------------|----------------------|------------------------|--------------|
| 331.2023             | 78.9%         | $C_{24}H_{27}O$      | 331.2062               | 12.0         |
|                      |               | $C_{16}H_{29}O_6N$   | 331.1995               | -8.6         |
|                      |               | $C_{19}H_{27}O_3N_2$ | 331.2021               | -0.5         |
|                      |               | $C_{22}H_{25}N_3$    | 331.2048               | 7.7          |
|                      |               | $C_{14}H_{27}O_5N_4$ | 331.1981               | -13.0        |
|                      |               | $C_{17}H_{25}O_2N_5$ | 331.2008               | -4.5         |

Figure S28 MS data of nitropyrrolin D (4) (Upper, positive ESI MS; Middle, negative ESI MS; Bottom, negative HR-FAB MS).

**Table S4.** NMR data for nitroprolin D (**4**) in CDCl<sub>3</sub>

| Position | $\delta_{\text{H}}$ mult ( <i>J</i> in Hz) | $\delta_{\text{C}}$ | COSY         | HMBC               | Key NOE |
|----------|--------------------------------------------|---------------------|--------------|--------------------|---------|
| 1        | 9.38, br s                                 |                     |              |                    |         |
| 2        |                                            | 137.5               |              |                    |         |
| 3        | 7.01, br s                                 | 111.5               | 5, 1'        | 2, 5               |         |
| 4        |                                            | 123.7               |              |                    |         |
| 5        | 6.84, br s                                 | 122.1               | 3            | 2, 3, 4            |         |
| 1'       | 2.72, m <sup>a</sup>                       | 32.7                | 3, 2'        | 3, 4, 2'           |         |
| 2'       | 4.18, dd (6.5, 6.5)                        | 77.6                | 1'           | 4, 1', 3', 4', 15' | 4'      |
| 3'       |                                            | 136.0               |              |                    |         |
| 4'       | 5.38, dd (7.0, 7.0)                        | 126.3               | 5', 15'      | 2', 5', 6', 15'    | 2'      |
| 5'       | 2.73, m <sup>a</sup>                       | 26.9                | 4', 6'       | 3', 4', 6', 7'     |         |
| 6'       | 5.08, m <sup>a</sup>                       | 121.9               | 5'           | 4'                 | 8'      |
| 7'       |                                            | 135.9               |              |                    |         |
| 8'       | 1.99, m                                    | 39.6                | 10'          | 6', 7', 9', 10'    | 6'      |
| 9'       | 2.07, m                                    | 26.7                | 10'          | 8', 10', 11'       |         |
| 10'      | 5.09, m <sup>a</sup>                       | 124.2               | 9', 12', 13' |                    |         |
| 11'      |                                            | 131.5               |              |                    |         |
| 12'      | 1.69, s                                    | 25.7                | 10'          | 10', 11'           |         |
| 13'      | 1.61, s                                    | 17.7                | 10'          | 10', 11'           |         |
| 14'      | 1.63, s                                    | 16.1                | 6'           | 6', 7'             |         |
| 15'      | 1.71, s                                    | 11.8                | 4'           | 3', 4'             |         |

<sup>a</sup> The multiplicity of this signal was unresolved due to peak overlapping and the chemical shift was assigned by interpretation of HSQC and HMBC spectroscopic data.



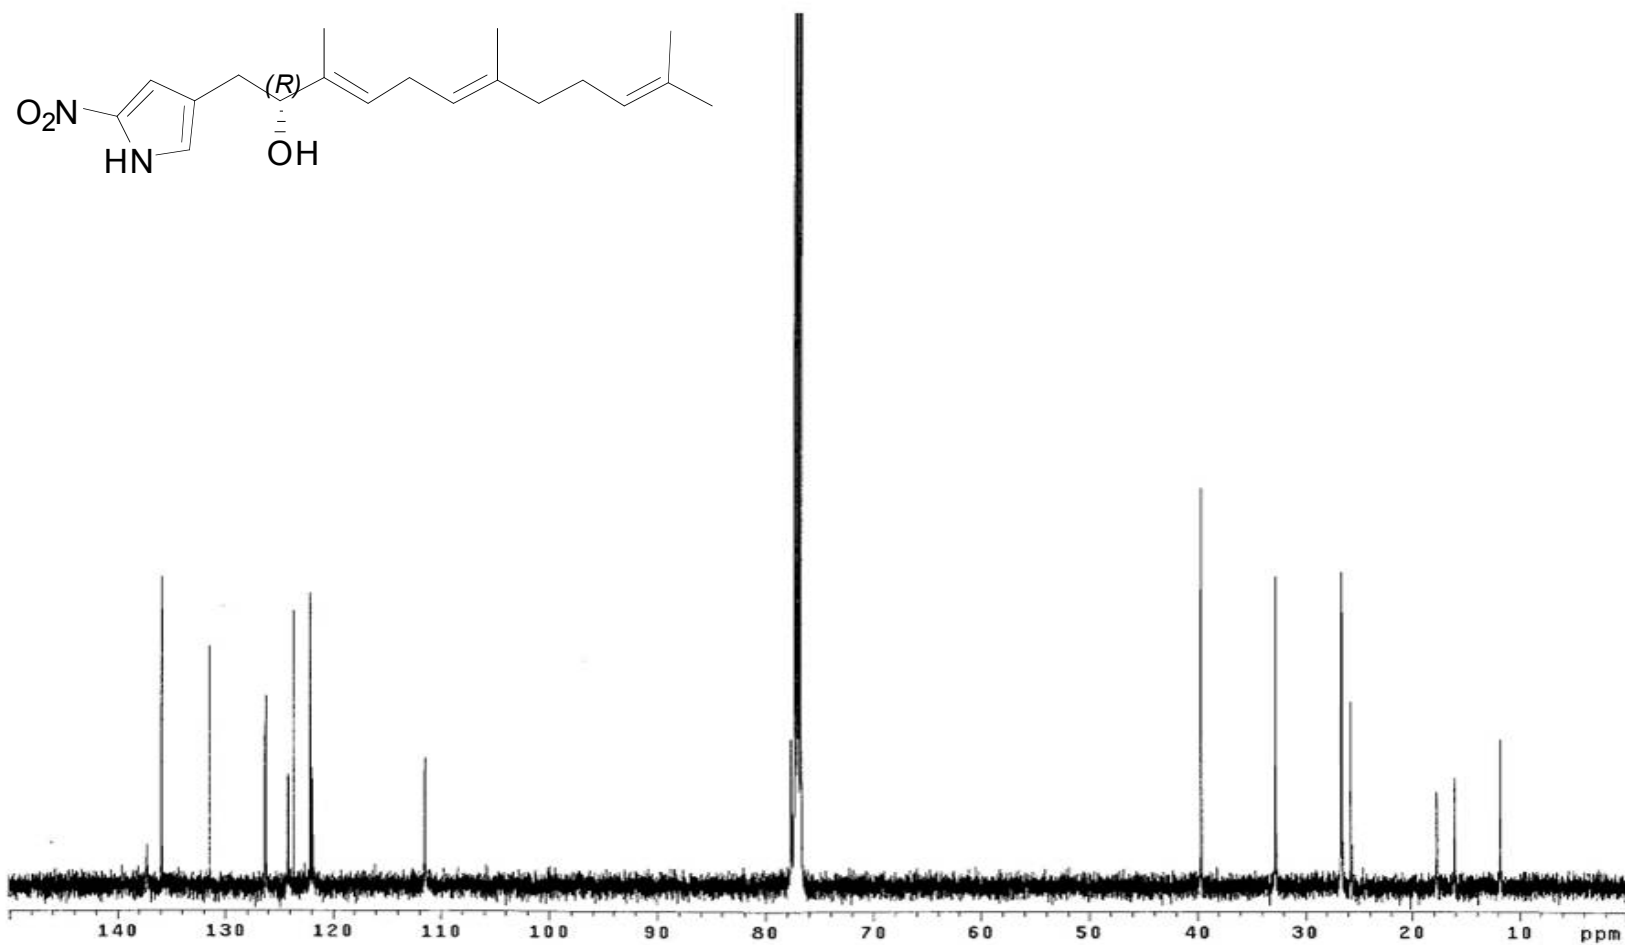

**Figure S30**  $^{13}\text{C}$  NMR spectrum of nitropyrrolin D (**4**) in  $\text{CDCl}_3$  (125 MHz).



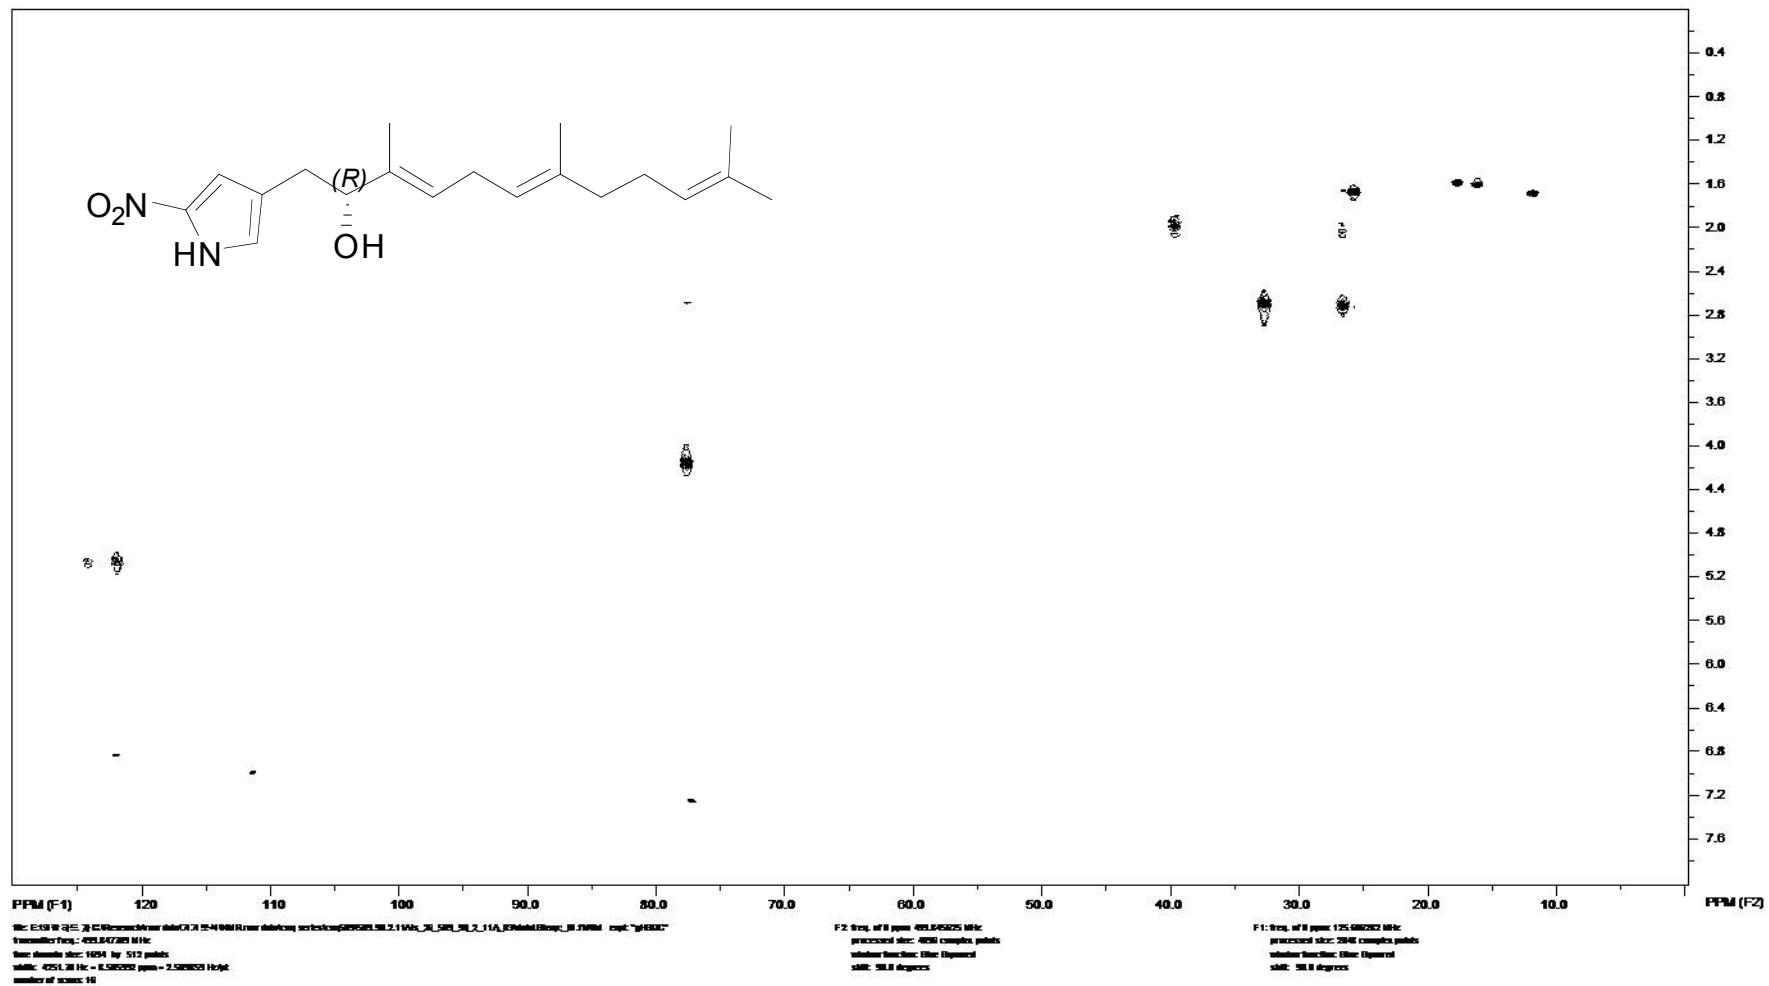

Figure S32 gHSQC spectrum of nitropyrrolin D (**4**) in CDCl<sub>3</sub> (500 MHz).





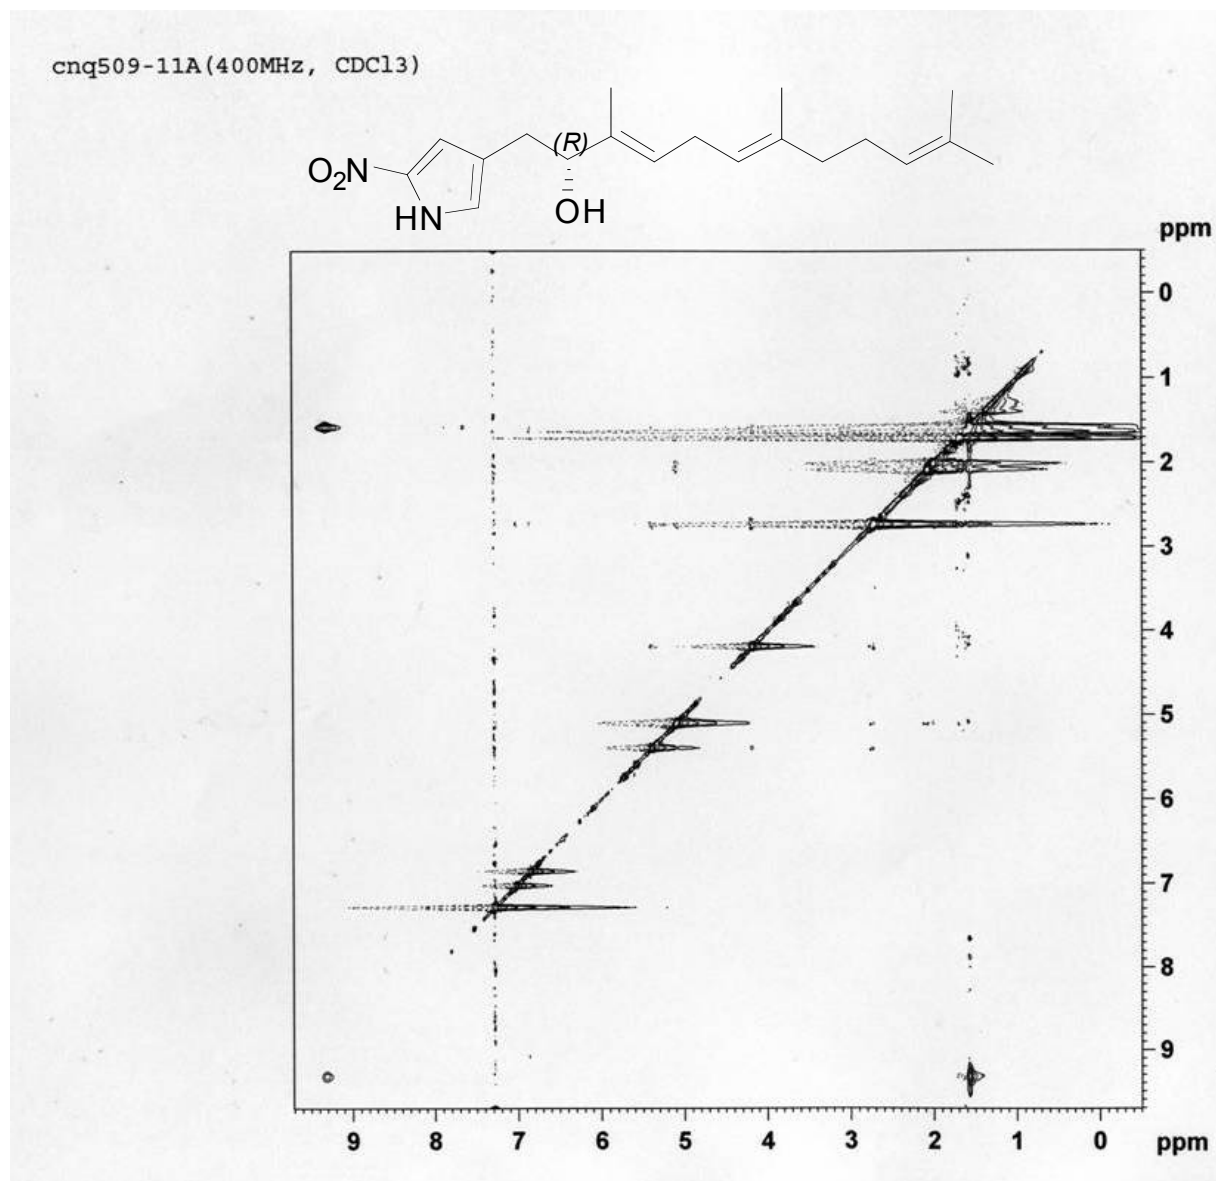

**Figure S34** 2D NOESY spectrum of nitropyrrolin D (**4**) in CDCl<sub>3</sub> (500 MHz).

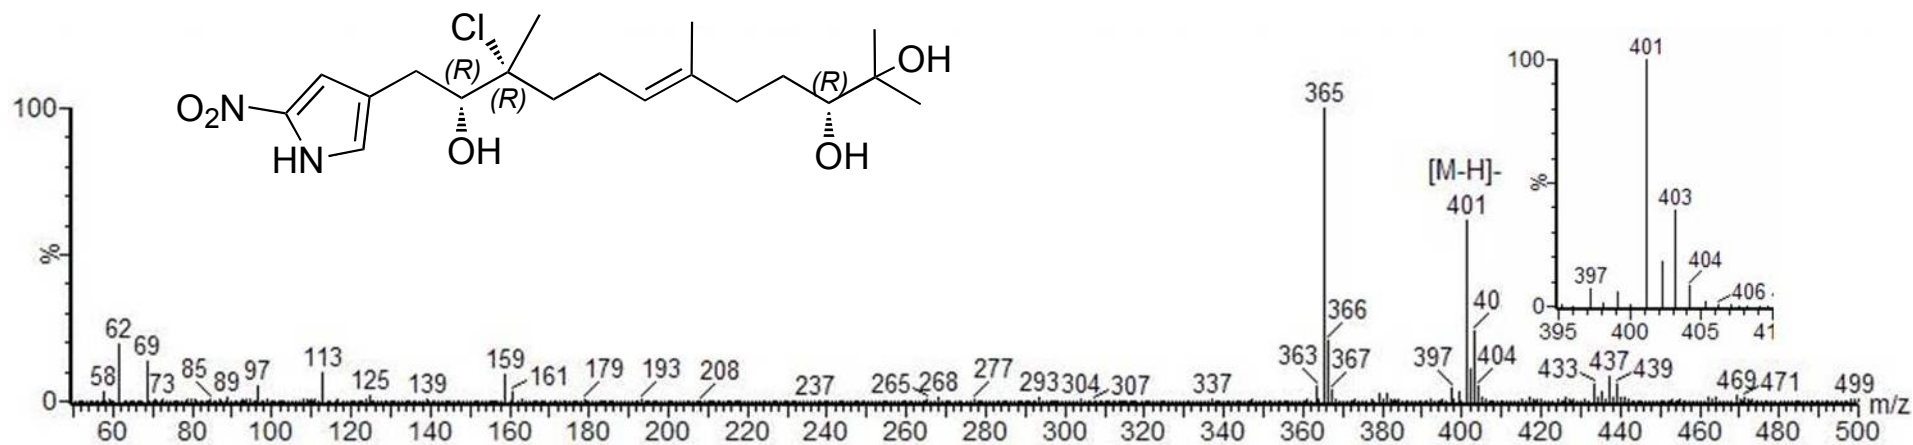

**Selected Isotopes :** H<sub>0.50</sub>C<sub>0.50</sub>N<sub>0.3</sub>O<sub>3.7</sub>Cl<sub>0.2</sub><sup>37</sup>Cl<sub>0.2</sub>      **Error Limit : 20 ppm**

| <i>Measured Mass</i> | <i>% Base</i> | <i>Formula</i>                                                                | <i>Calculated Mass</i> | <i>Error</i> |
|----------------------|---------------|-------------------------------------------------------------------------------|------------------------|--------------|
| 401.1837             | 36.8%         | C <sub>25</sub> H <sub>25</sub> N <sub>2</sub> O <sub>3</sub>                 | 401.1865               | 7.0          |
|                      |               | C <sub>22</sub> H <sub>27</sub> N <sub>6</sub> O <sub>6</sub>                 | 401.1838               | 0.3          |
|                      |               | C <sub>24</sub> H <sub>30</sub> O <sub>3</sub> Cl                             | 401.1883               | 12.0         |
|                      |               | C <sub>23</sub> H <sub>28</sub> N <sub>3</sub> O <sub>3</sub> Cl              | 401.1757               | -20.0        |
|                      |               | C <sub>19</sub> H <sub>30</sub> N <sub>2</sub> O <sub>5</sub> Cl              | 401.1843               | 1.5          |
|                      |               | C <sub>16</sub> H <sub>33</sub> N <sub>3</sub> O <sub>4</sub> Cl <sub>2</sub> | 401.1848               | 2.7          |

**Figure S35** MS data of nitropyrrolin E (5) (Upper, positive ESI MS; Middle, negative ESI MS; Bottom, negative HR-FAB MS).

**Table S5.** NMR data for nitropyrrolin E (**5**) in CDCl<sub>3</sub>

| Position | $\delta_{\text{H}}$ mult ( $J$ in Hz)                      | $\delta_{\text{C}}$ | COSY    | HMBC          | Key NOE      |
|----------|------------------------------------------------------------|---------------------|---------|---------------|--------------|
| 1        | 9.58, br s                                                 |                     | 3, 5    |               |              |
| 2        |                                                            | 137.4               |         |               |              |
| 3        | 7.08, br s                                                 | 111.5               | 1, 5    | 2, 5          |              |
| 4        |                                                            | 123.9               |         |               |              |
| 5        | 6.92, br s                                                 | 122.2               | 1, 3    | 2, 3, 4       |              |
| 1'       | 2.94, dd (15.0, 2.0)<br>2.60, dd (15.0, 10.5)              | 29.8                |         | 3, 4, 5, 2'   | 2'           |
| 2'       | 3.76, br d (10.5)                                          | 78.3                | 1'      |               | 1', 4', 15'  |
| 3'       |                                                            | 77.9                |         |               |              |
| 4'       | 1.98, ddd (14.0, 11.0, 5.0)<br>1.72, ddd (14.0, 11.0, 5.0) | 39.9                | 5'      |               | 2'           |
| 5'       | 2.29, m <sup>a</sup><br>2.19, m <sup>a</sup>               | 23.5                | 4', 6'  | 6', 7'        |              |
| 6'       | 5.22, dd (7.0, 7.0)                                        | 123.9               | 5', 14' | 5', 8', 14'   | 8'           |
| 7'       |                                                            | 136.1               |         |               |              |
| 8'       | 2.27, m <sup>a</sup><br>2.09, ddd (15.0, 8.0, 8.0)         | 36.9                | 9'      | 6', 7', 9'    | 6', 10'      |
| 9'       | 1.60, m <sup>a</sup><br>1.42, dddd (14.0, 10.0, 8.0, 5.0)  | 29.9                | 8', 10' | 8'            |              |
| 10'      | 3.36, dd (10.0, 1.5)                                       | 78.2                | 9'      |               | 8', 12', 13' |
| 11'      |                                                            | 73.2                |         |               |              |
| 12'      | 1.22, s                                                    | 26.2                |         | 10', 11', 13' | 10'          |
| 13'      | 1.18, s                                                    | 23.6                |         | 10', 11', 12' | 10'          |
| 14'      | 1.66, s                                                    | 16.1                |         | 6', 7', 8'    |              |
| 15'      | 1.62, s                                                    | 25.9                |         | 3'            | 2'           |



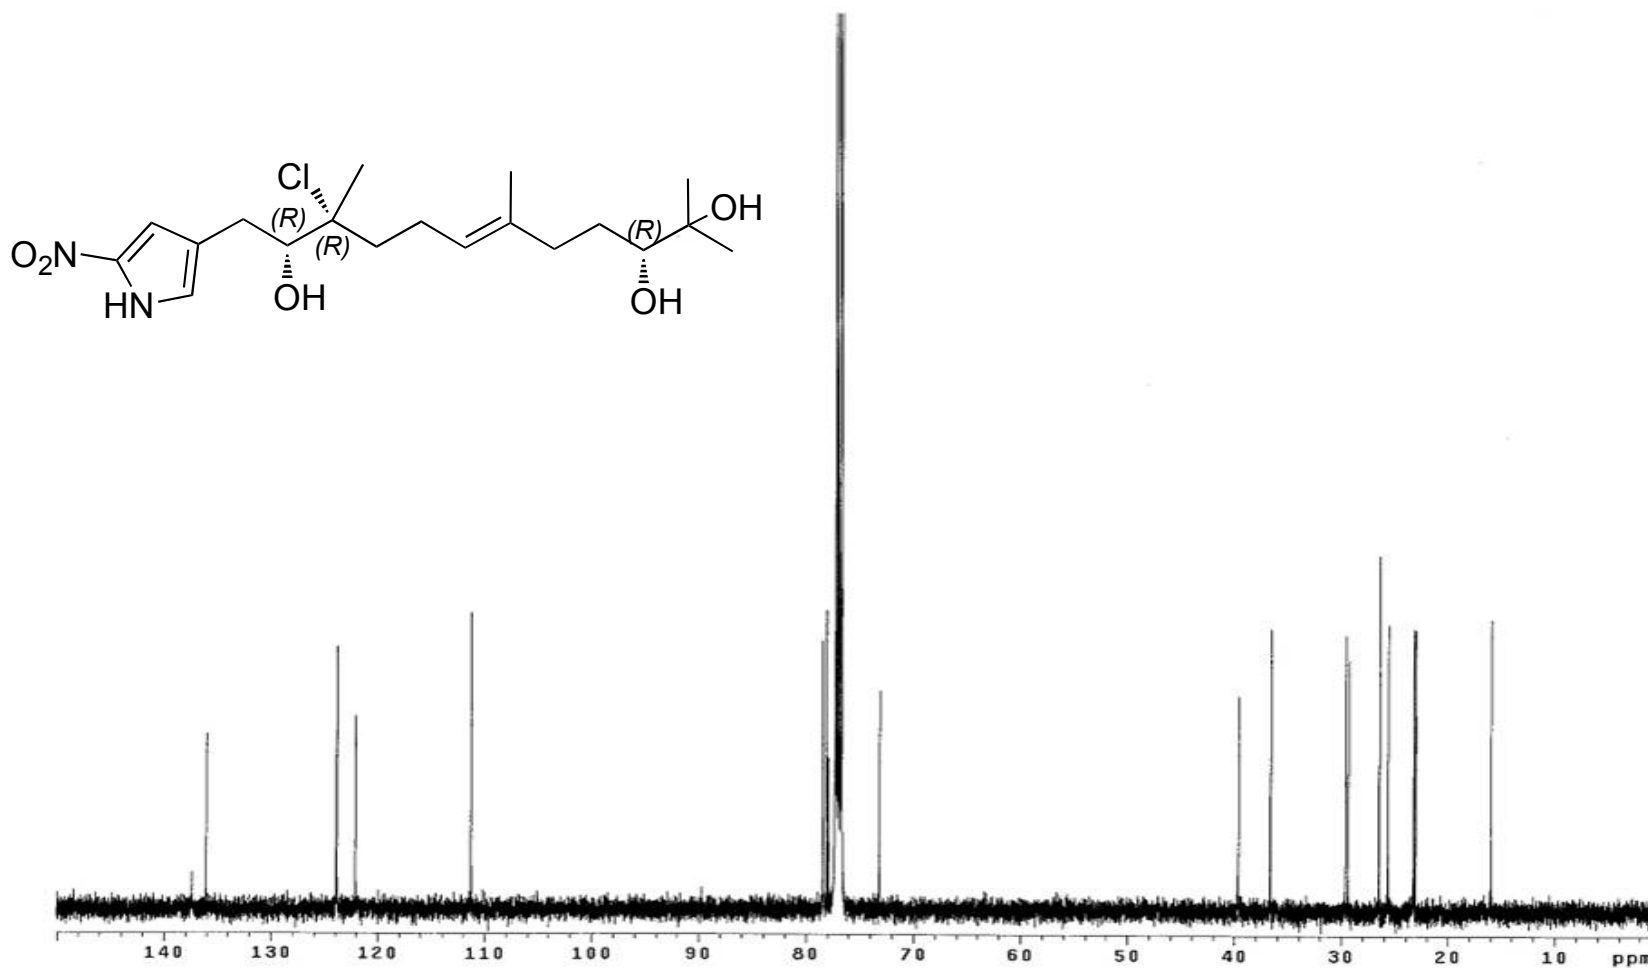

**Figure S37** <sup>13</sup>C NMR spectrum of nitropyrrolin E (**5**) in CDCl<sub>3</sub> (125 MHz).

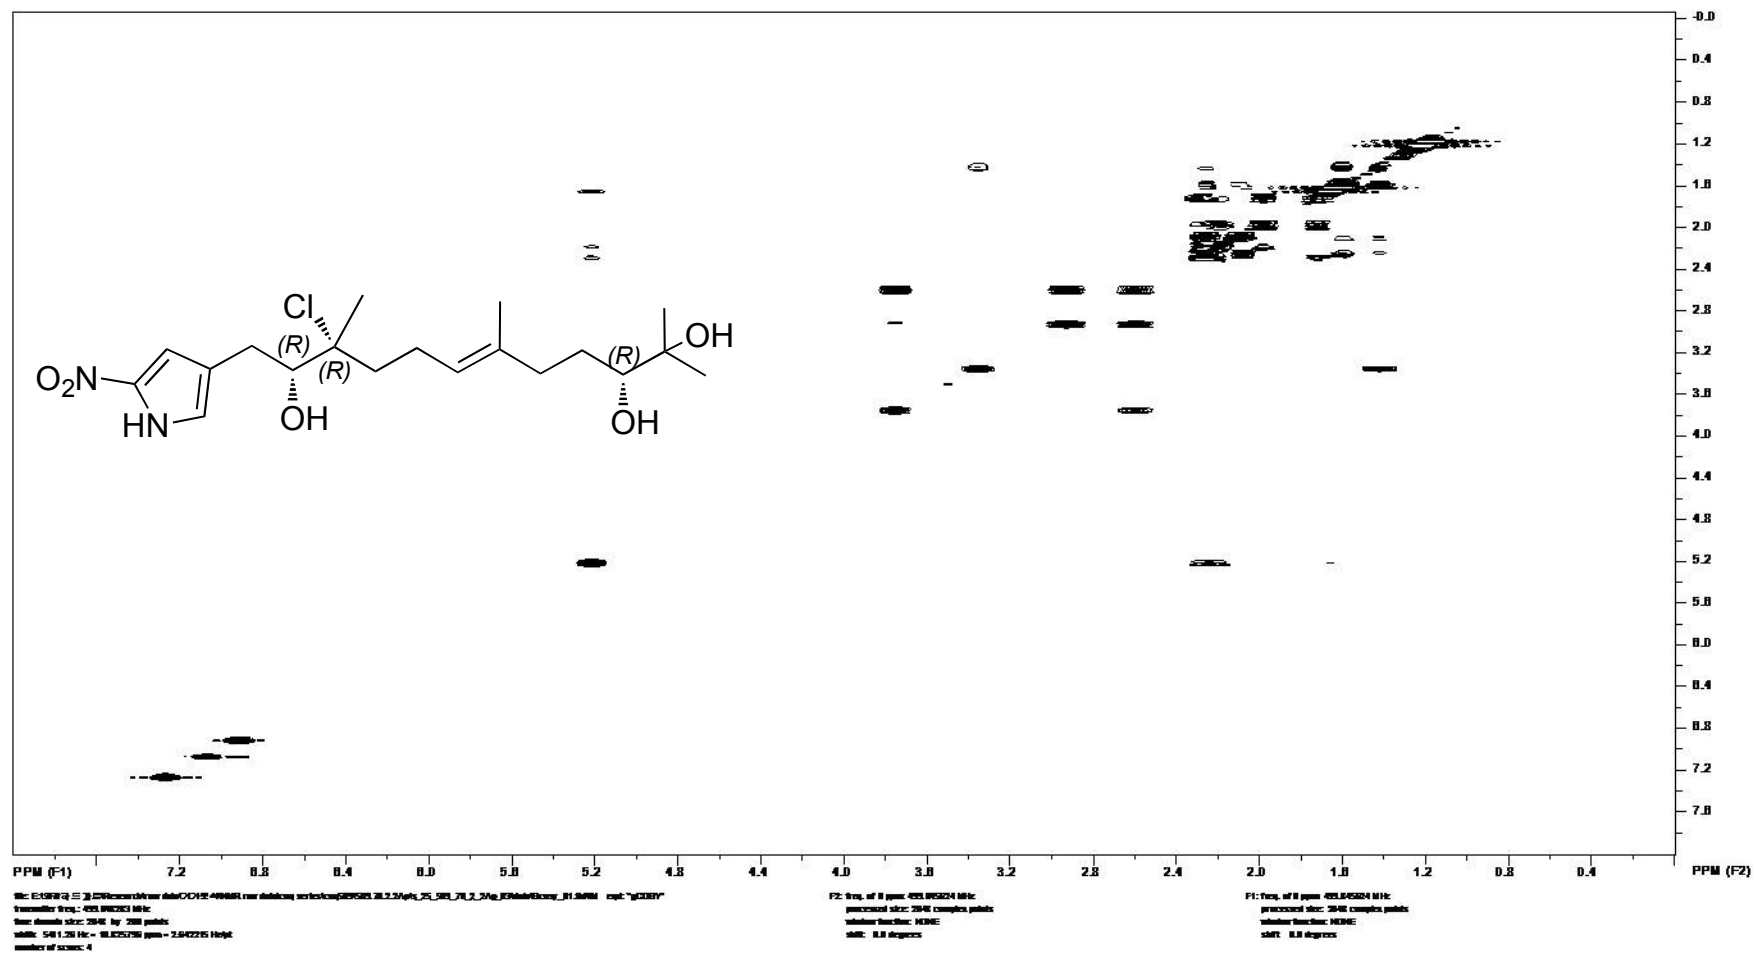

Figure S38 <sup>1</sup>H-<sup>1</sup>H gCOSY spectrum of nitropyrrolin E (5) in CDCl<sub>3</sub> (500 MHz).





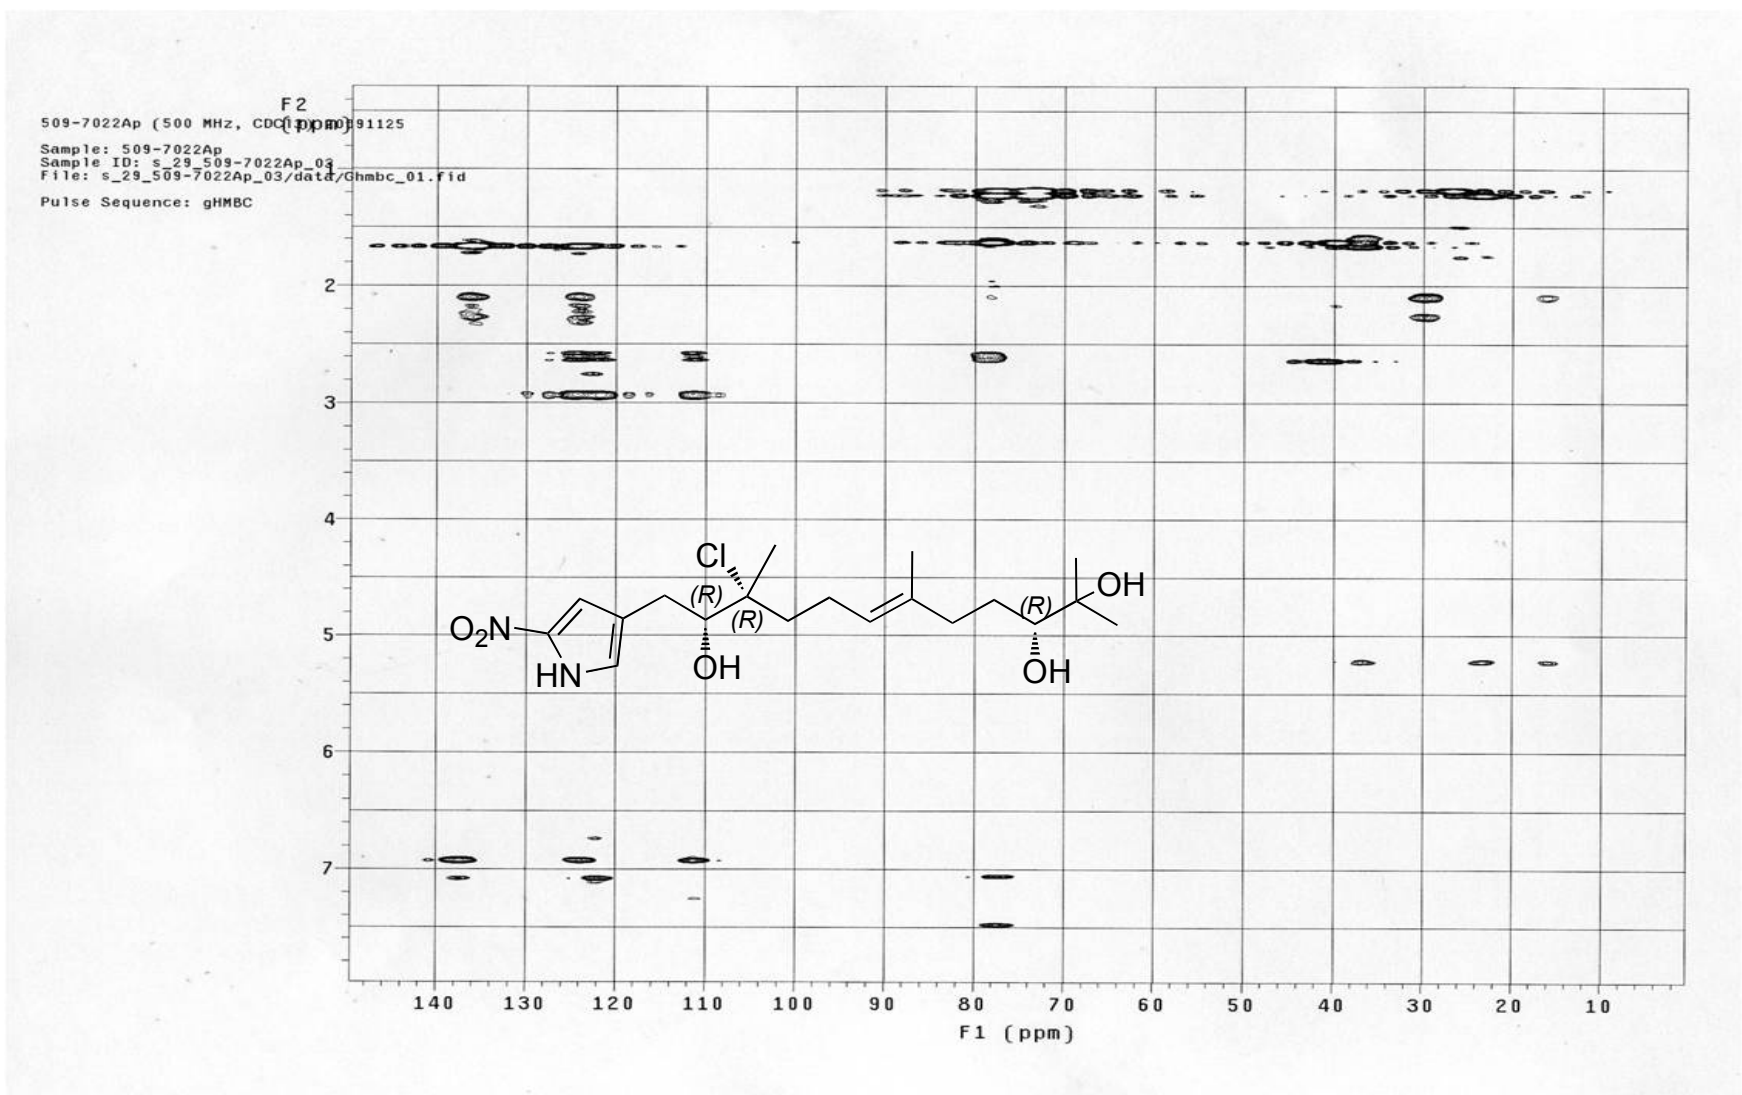

Figure S40 gHMBC spectrum of nitropyrrolin E (5) in CDCl<sub>3</sub> (500 MHz).

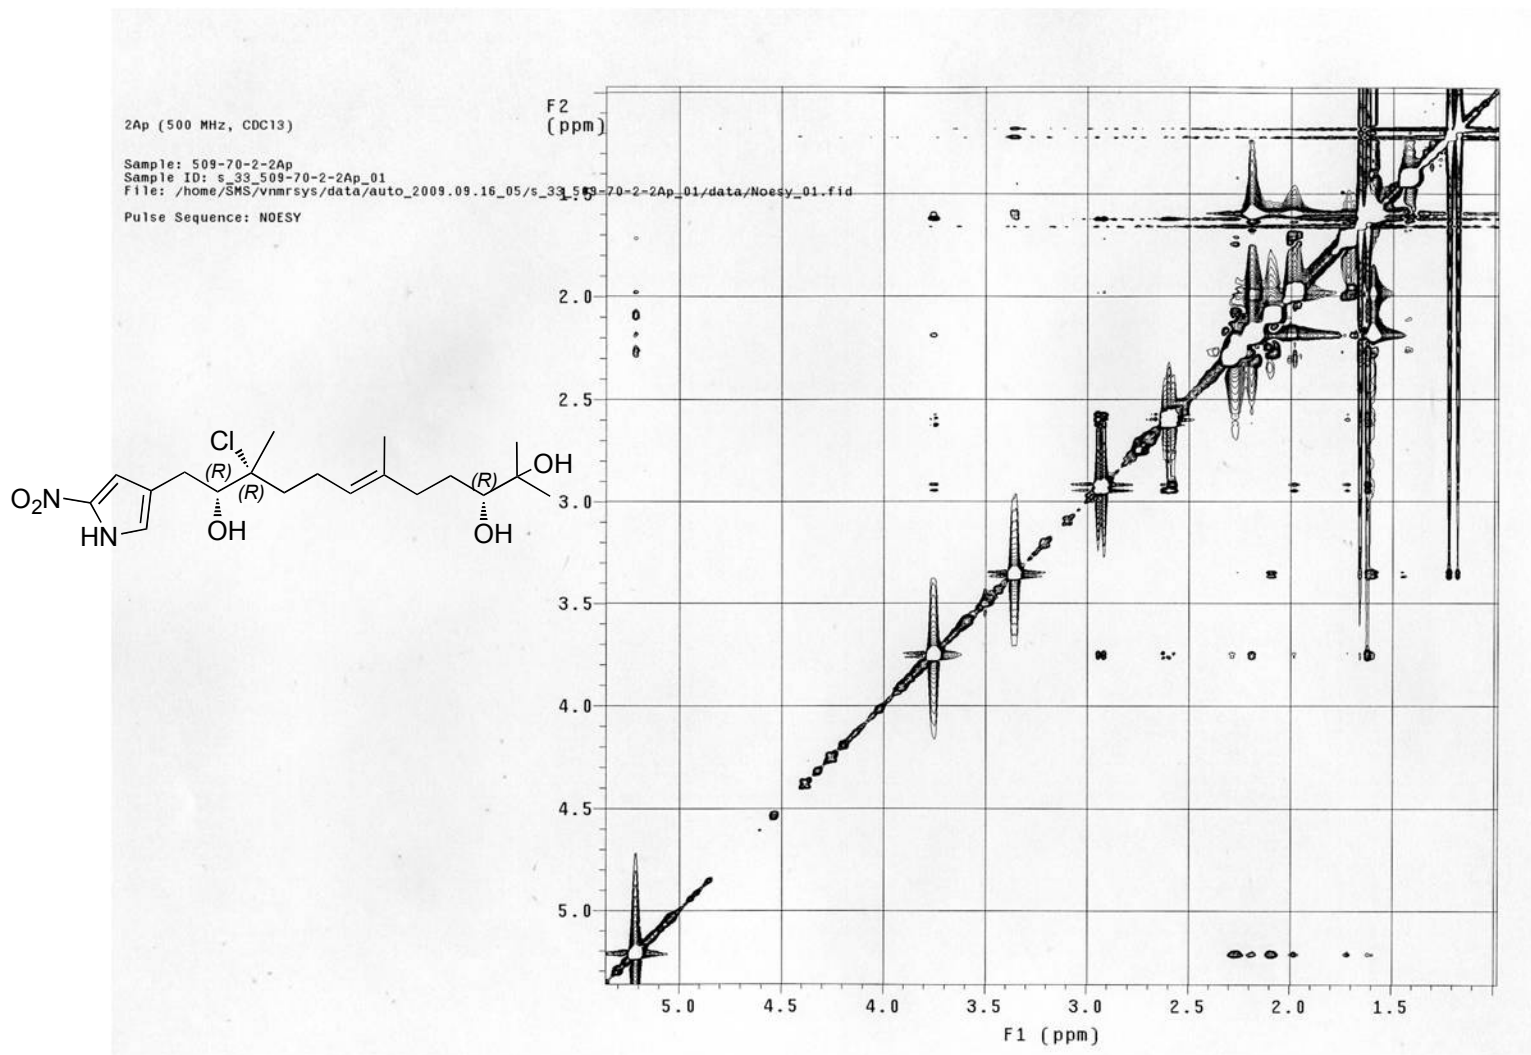

**Figure S41** 2D NOESY spectrum of nitropyrrolin E (**5**) in CDCl<sub>3</sub> (500 MHz).



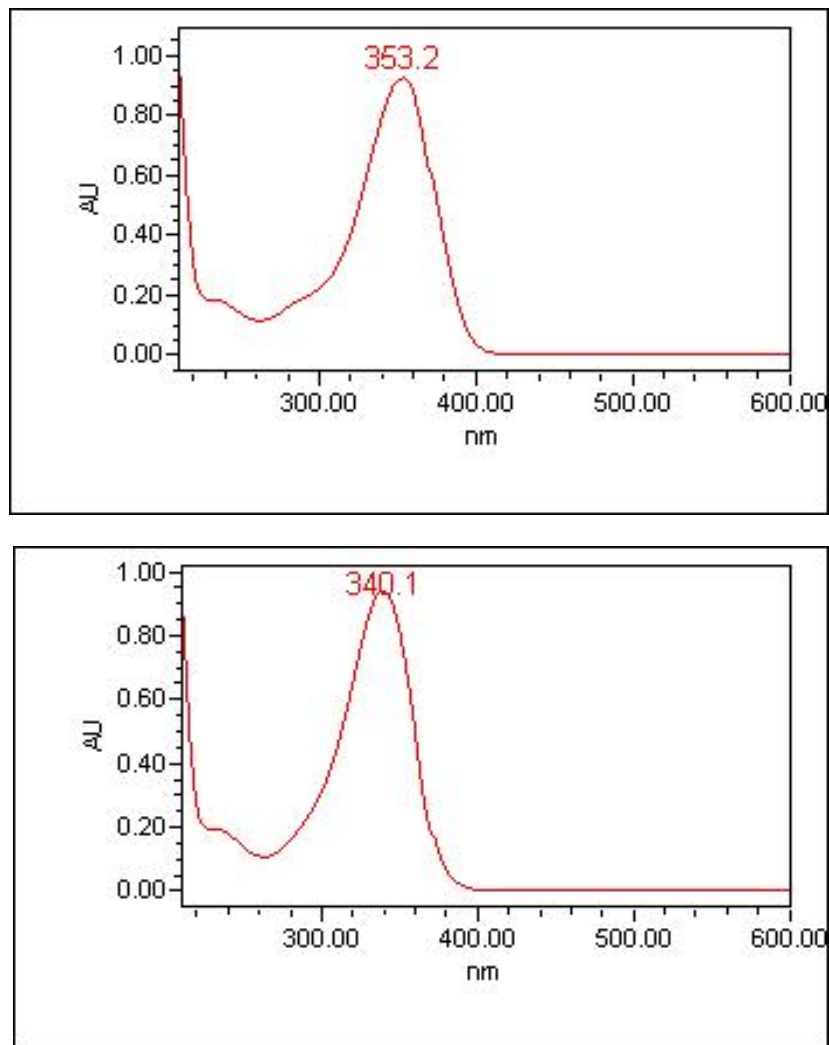

**Figure S43** UV spectra (PDA detector) of  $\gamma$ -farnesyl- $\alpha$ -nitropyrrole (**7**) (upper) and  $\beta$ -farnesyl- $\alpha$ -nitropyrrole (**8**) (bottom) (acetonitril-water solvent mixture).



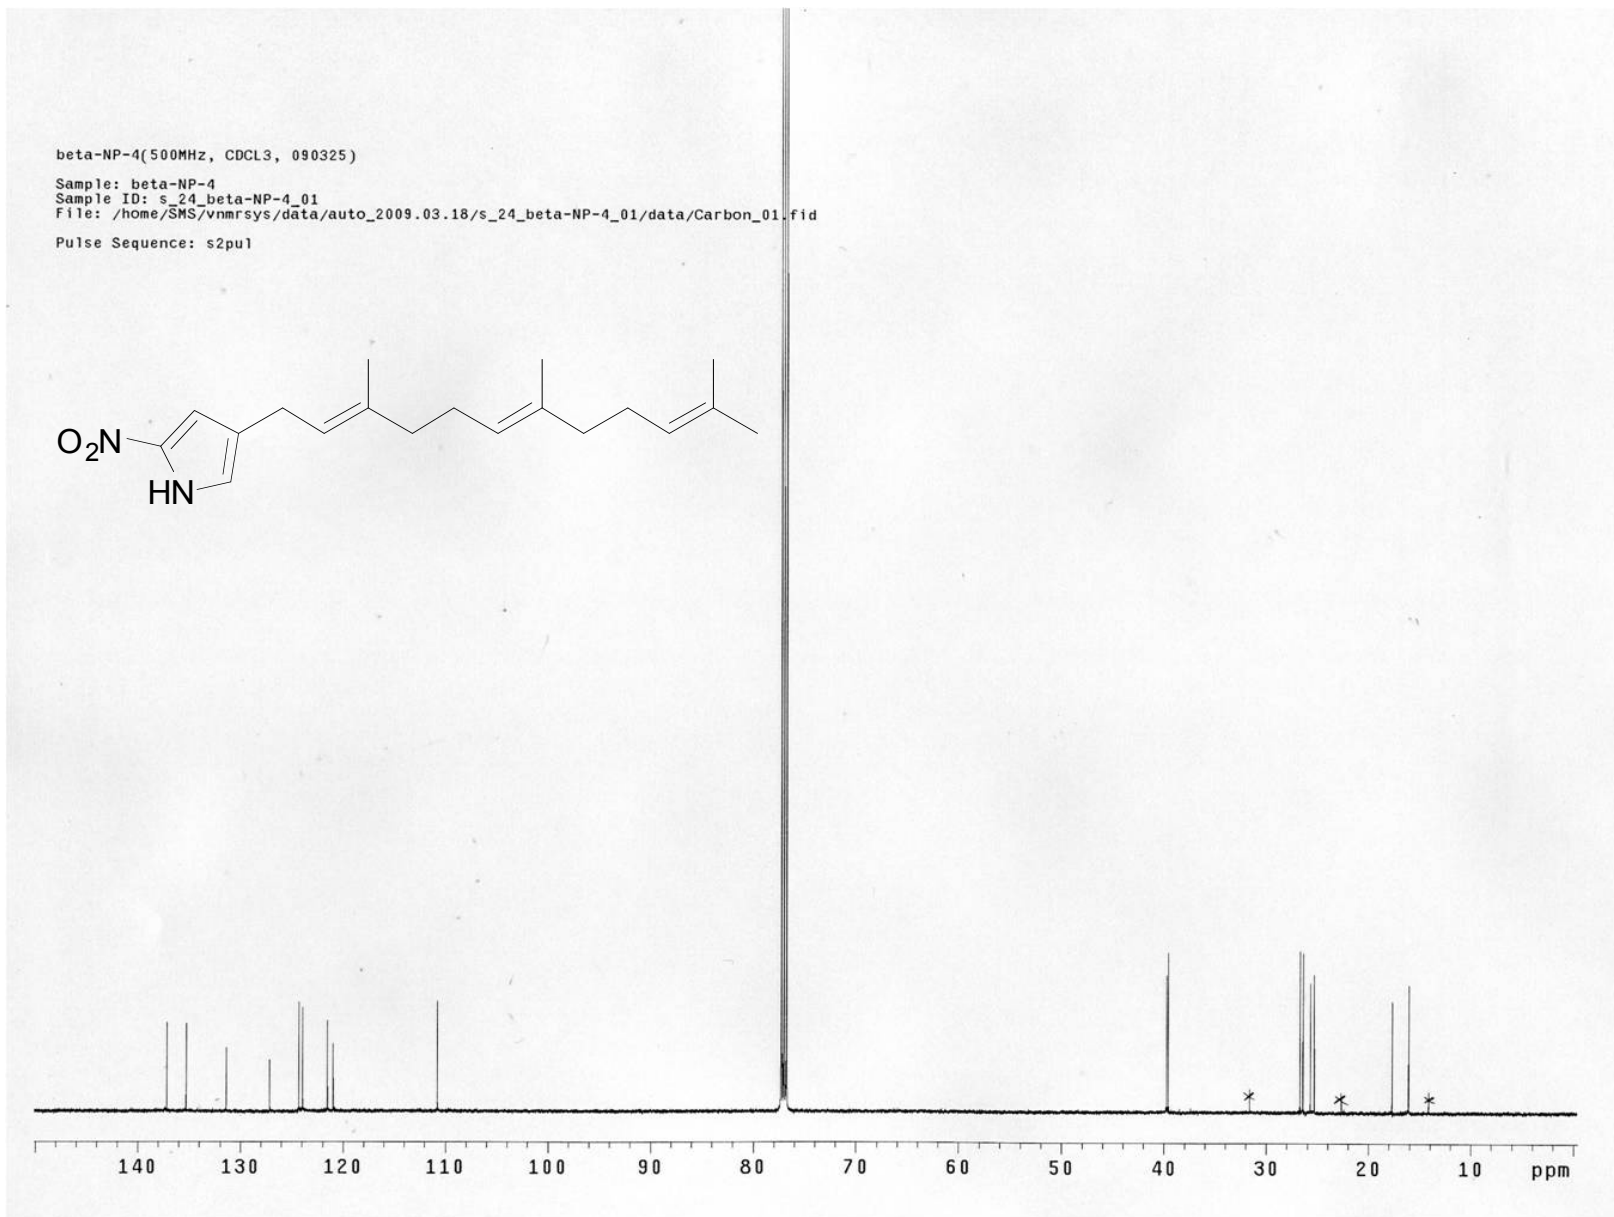

**Figure S45**  $^{13}\text{C}$  NMR spectrum of  $\gamma$ -farnesyl- $\alpha$ -nitropyrrole (**7**) in  $\text{CDCl}_3$  (125 MHz).



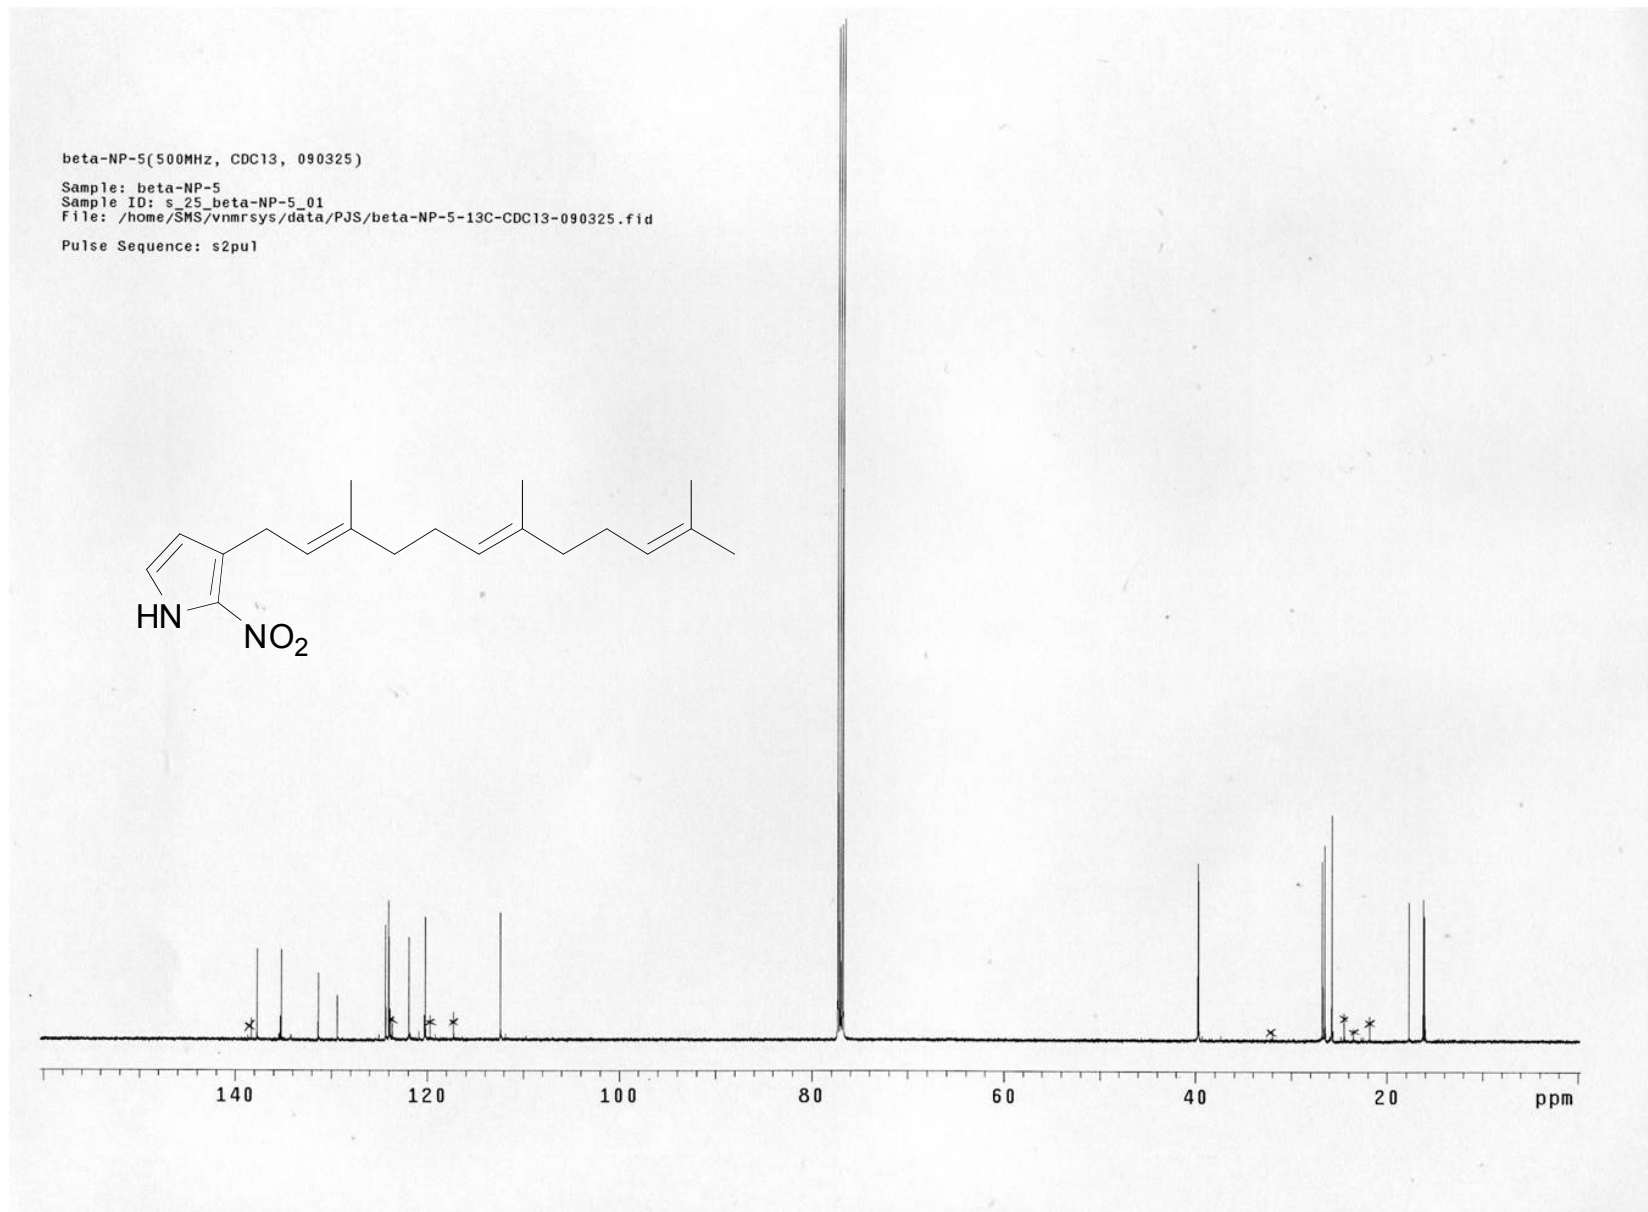

**Figure S47**  $^{13}\text{C}$  NMR spectrum of  $\beta$ -farnesyl- $\alpha$ -nitropyrrole (**8**) in  $\text{CDCl}_3$  (125 MHz).



SpinWorks 2.5: 509.90.2.7B\_R\_C1 (500 MHz, Pyridine-d5)

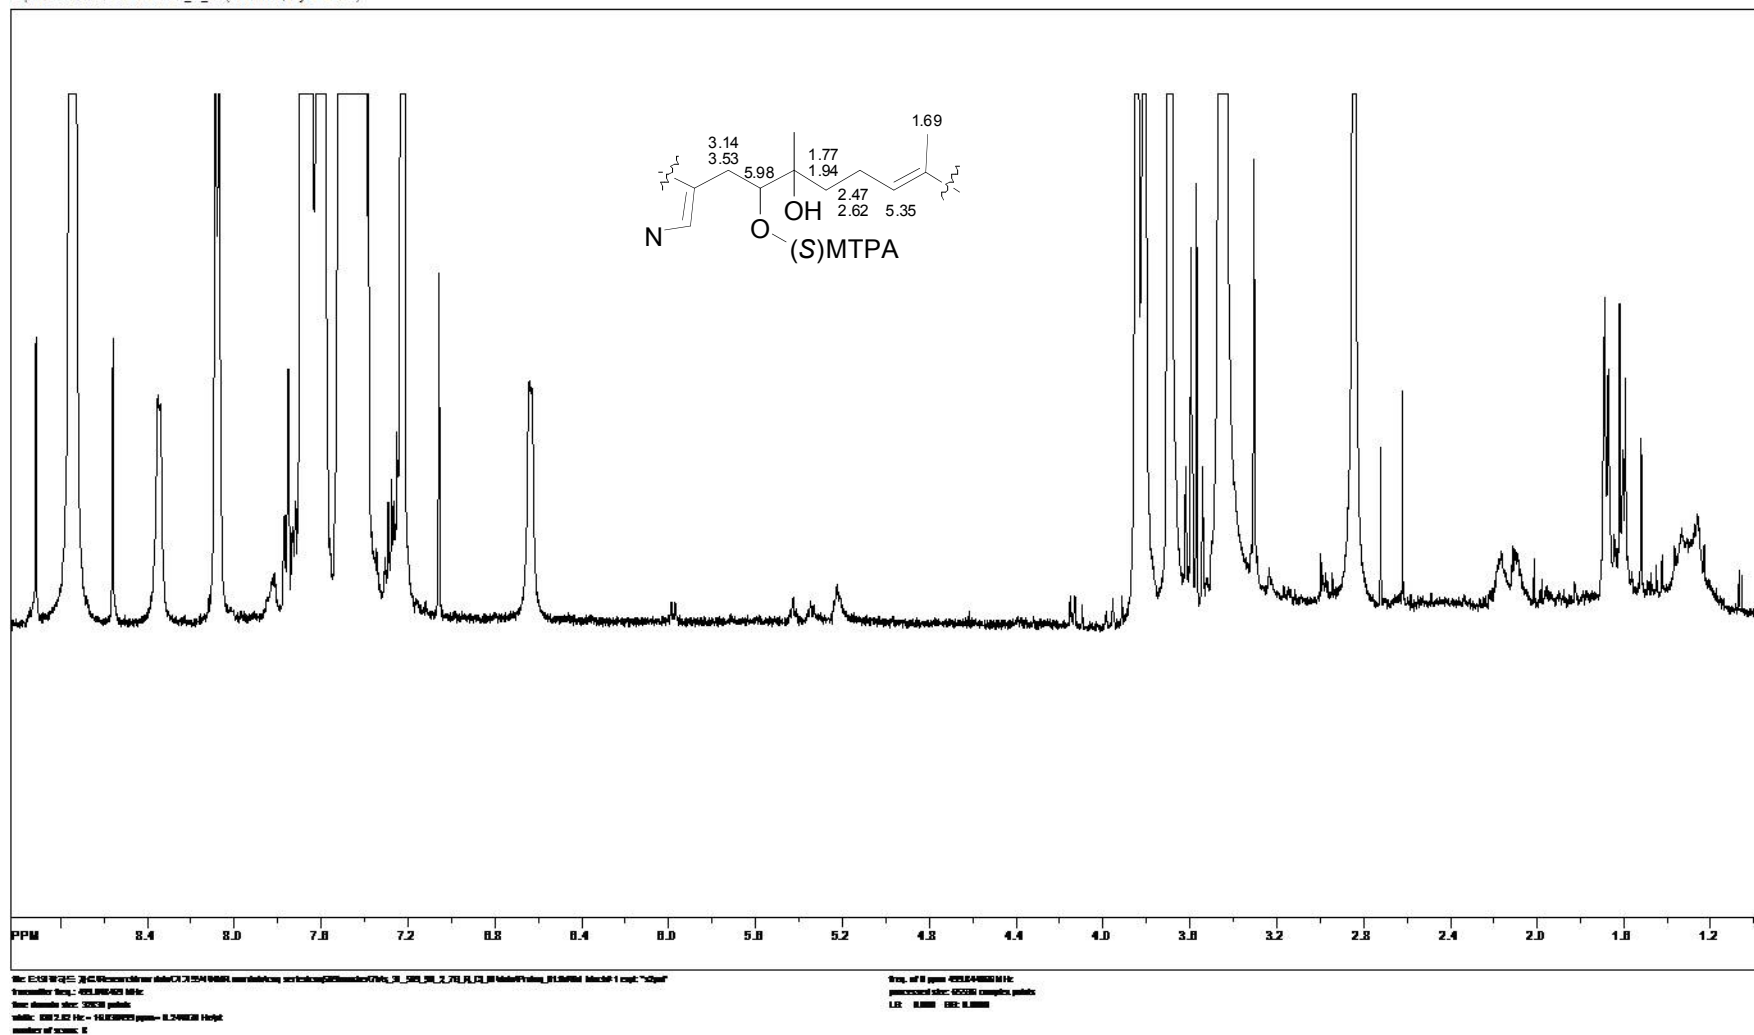

Figure S48 <sup>1</sup>H NMR spectrum of the (S)-Mosher ester of 1 (9a) in pyridine-d<sub>5</sub> (500 MHz).

SpinWorks 2.5: 509.90.2.7B\_R\_CI (500 MHz, Pyridine-d<sub>5</sub>)

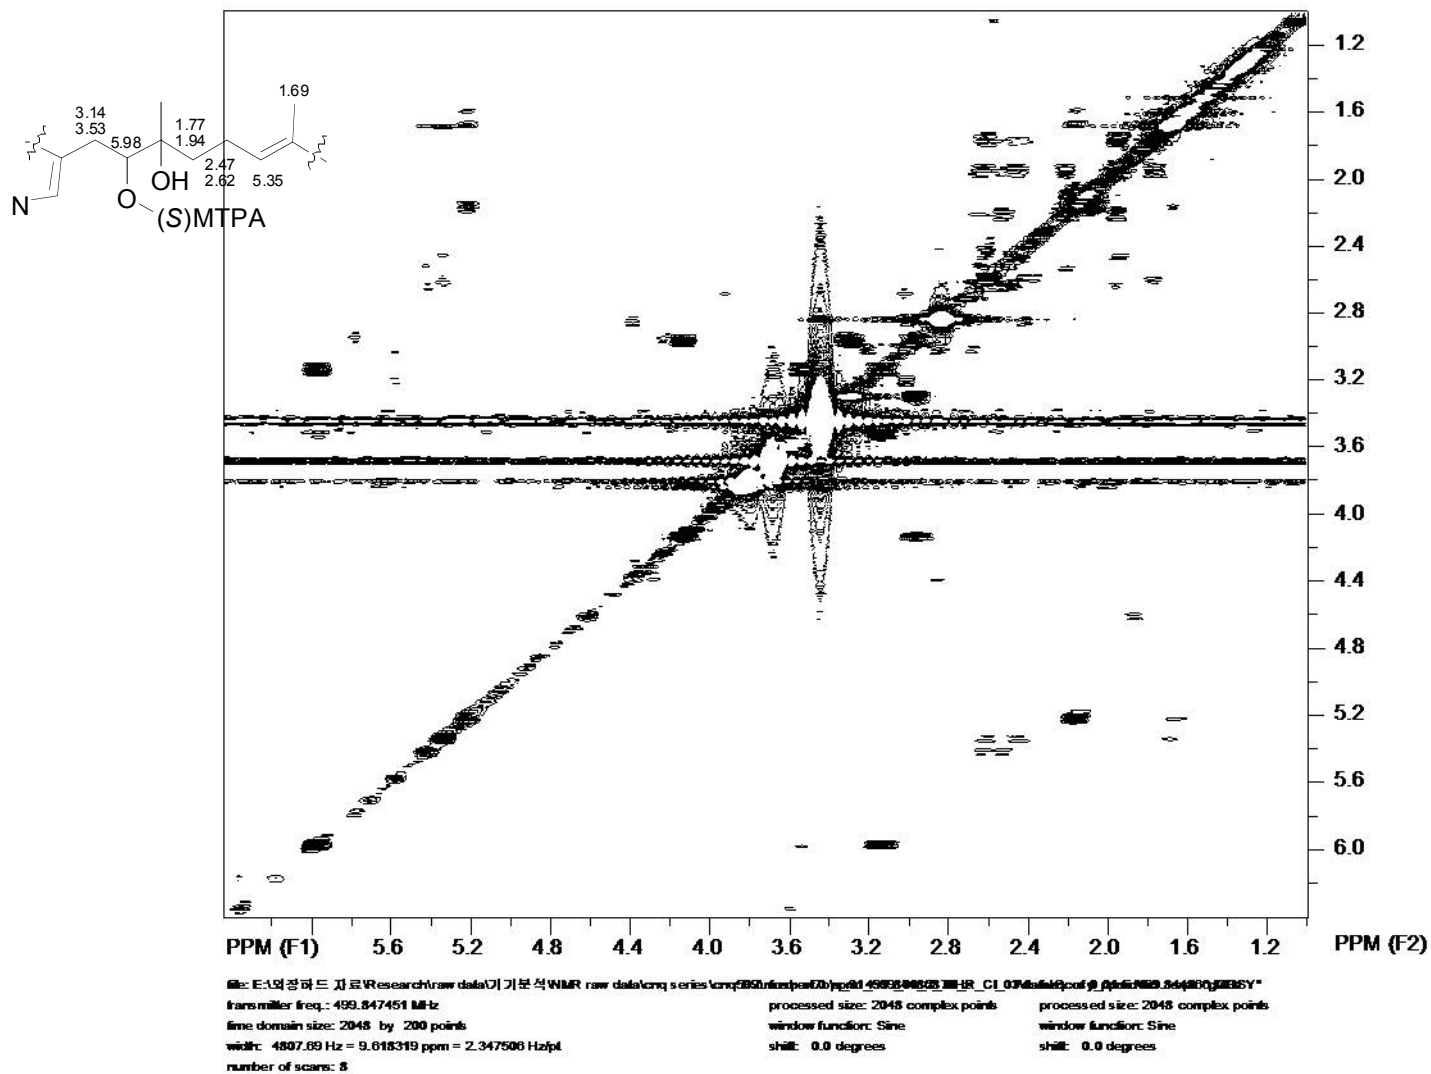

Figure S49 <sup>1</sup>H-<sup>1</sup>H gCOSY spectrum of the (*S*)-Mosher ester of **1** (**9a**) in pyridine-*d*<sub>5</sub> (500 MHz).



SpinWorks 2.5: 509.90.2.7B\_SCI (500 MHz, Pyridine-d5)

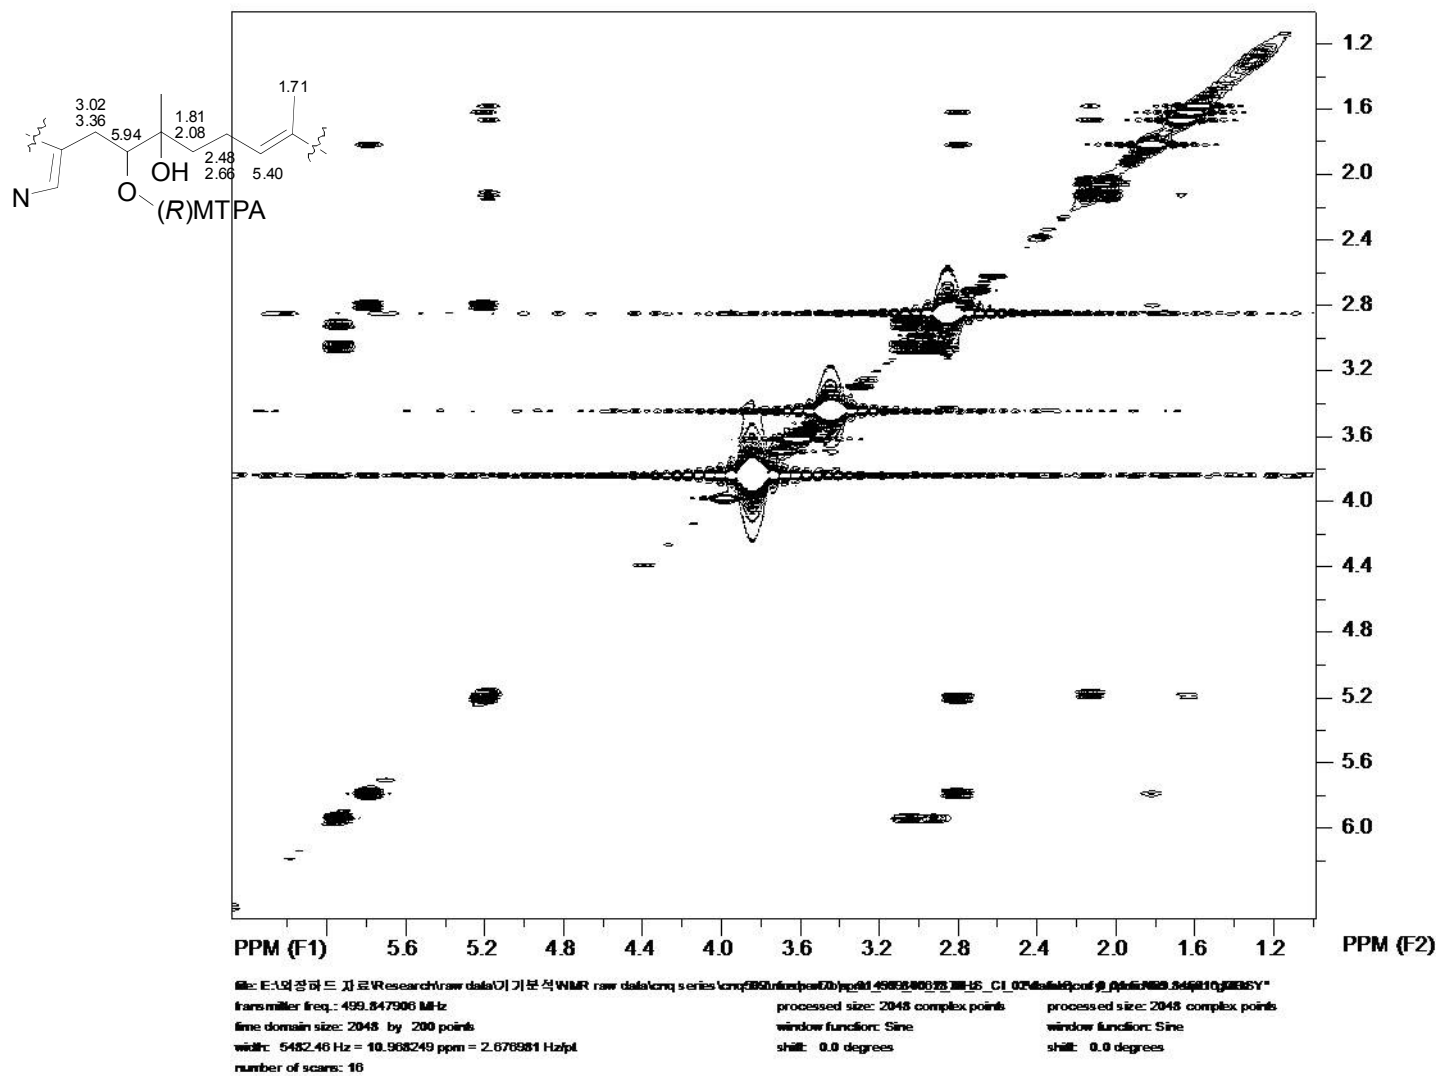

Figure S51  $^1\text{H}$ - $^1\text{H}$  gCOSY spectrum of the (*R*)-Mosher ester of **1** (**9b**) in pyridine- $d_5$  (500 MHz).



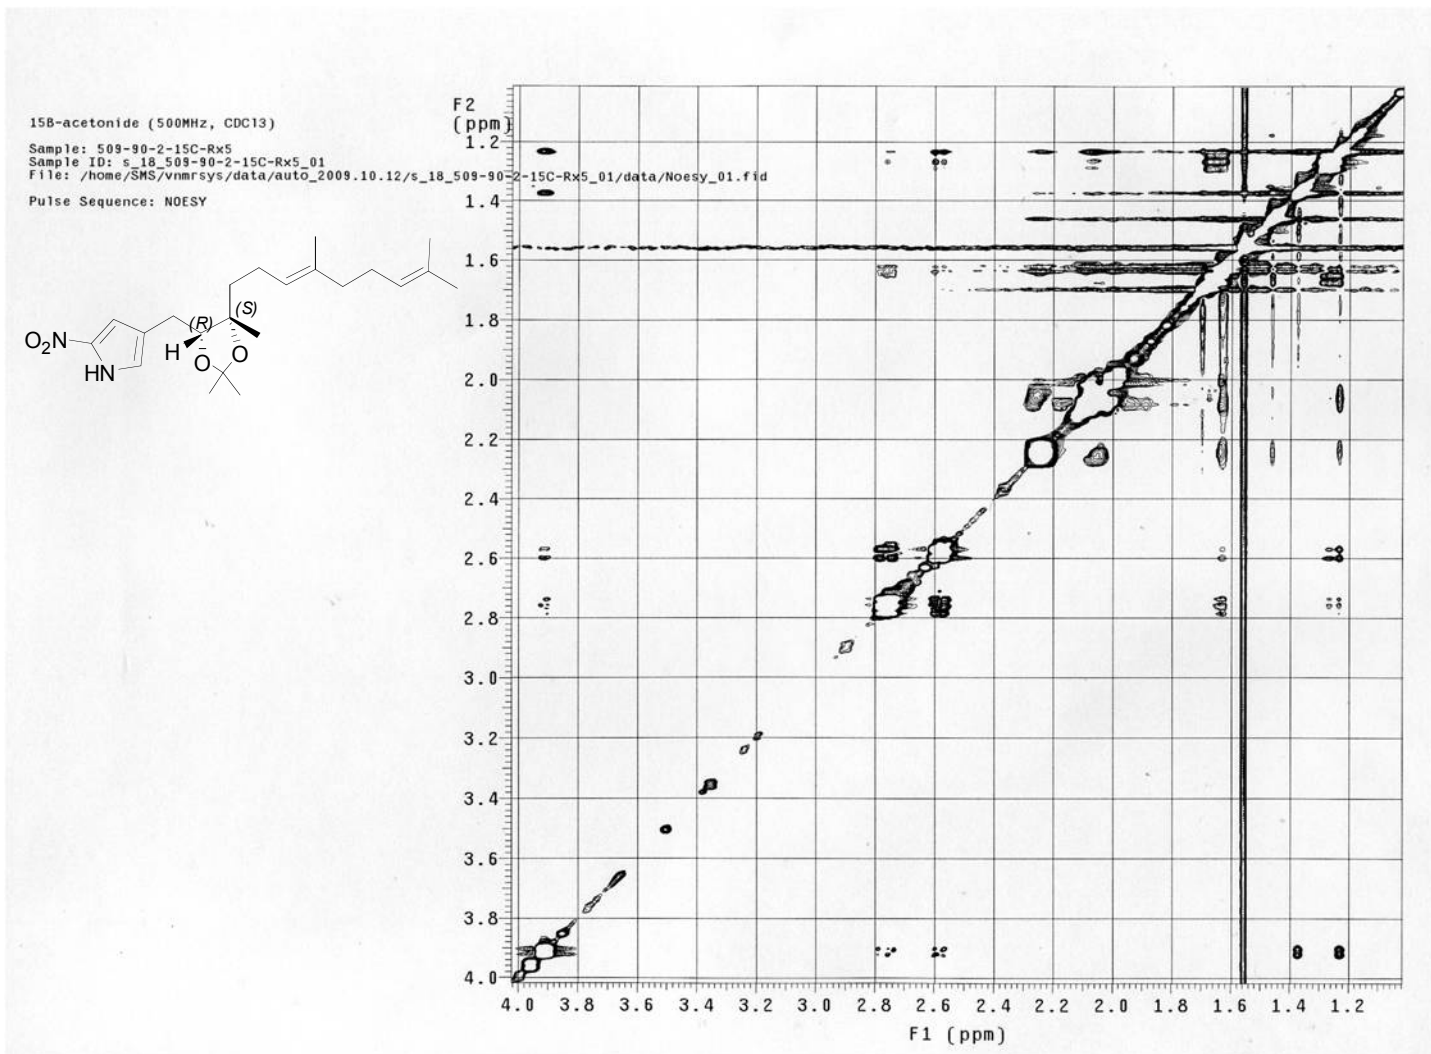

**Figure S53** 2D NOESY spectrum of the acetonide derivative of **2** (**10**) in CDCl<sub>3</sub> (500 MHz).

SpinWorks 2.5: 509.15C-ac-PPTS-3 (500 MHz, CDCl3)

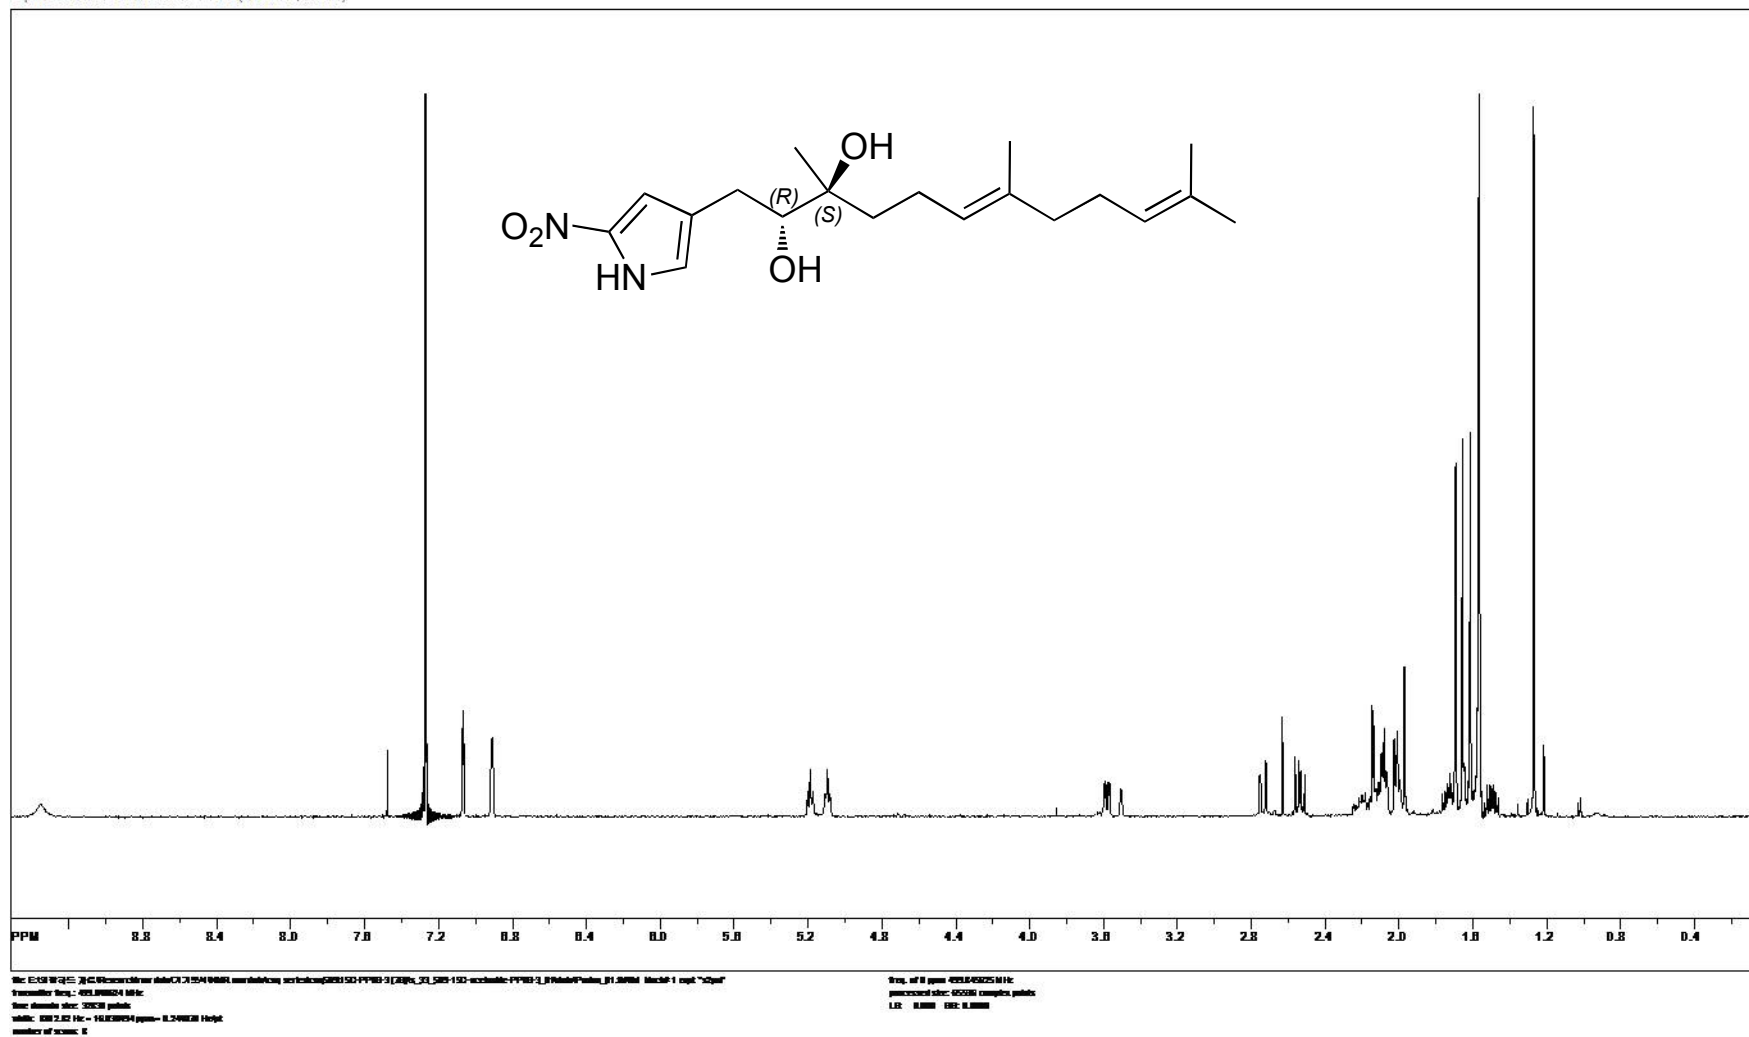

Figure S54 <sup>1</sup>H NMR spectrum of the diol derivative of 2 (11) in CDCl<sub>3</sub> (500 MHz).

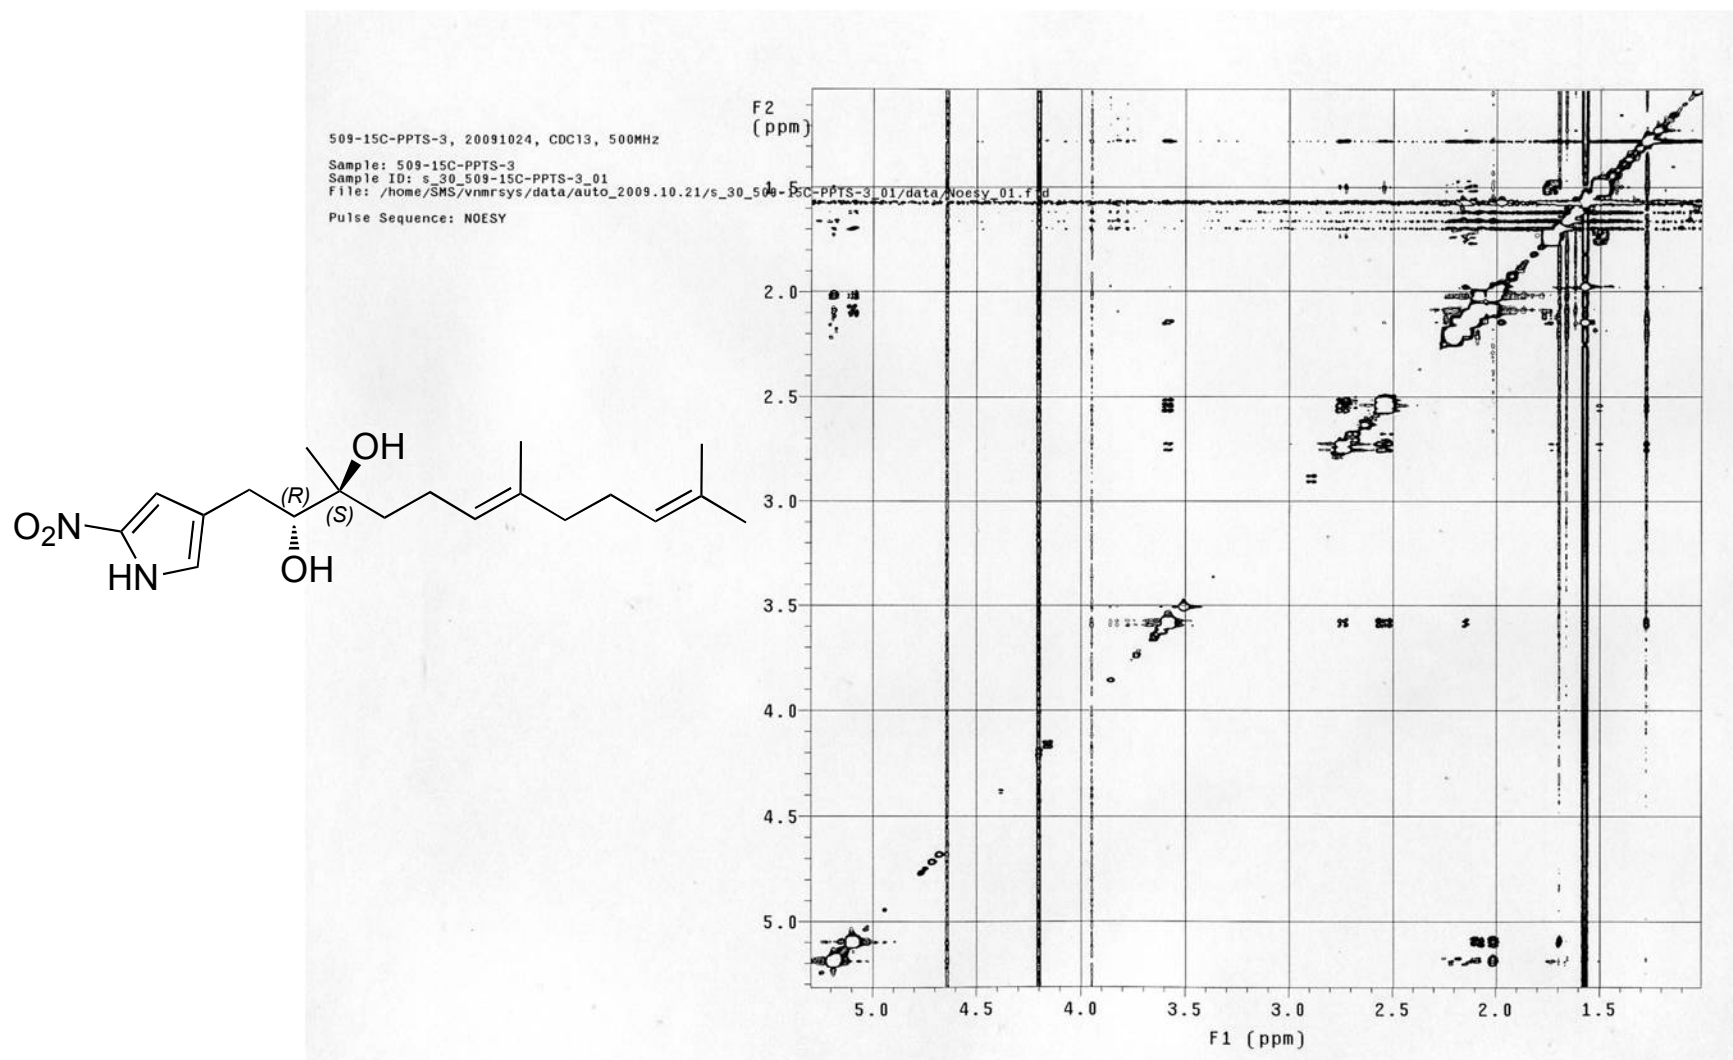

Figure S55 2D NOESY spectrum of the diol derivative of **2** (**11**) in  $\text{CDCl}_3$  (500 MHz).



SpinWorks 2.5: 15C-ppts-RC1 (500 MHz, pyridine-d5)

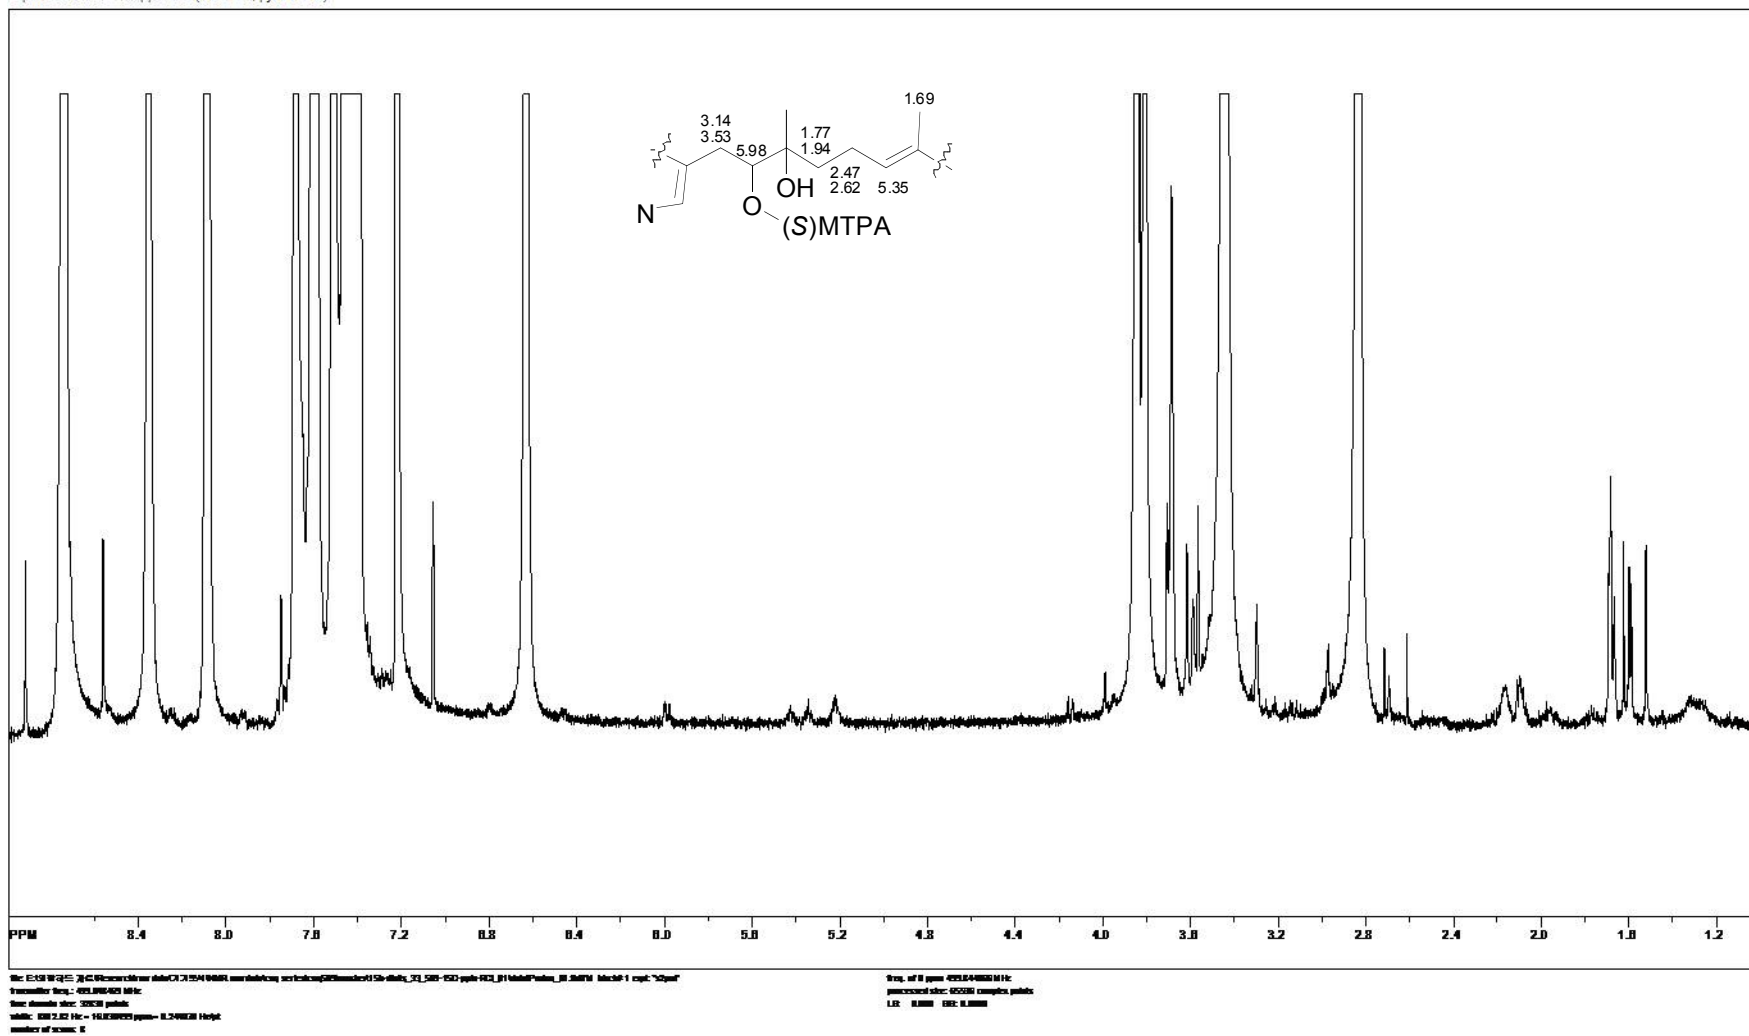

Figure S56 <sup>1</sup>H NMR spectrum of the (S)-Mosher ester of **11** in pyridine-*d*<sub>5</sub> (500 MHz).



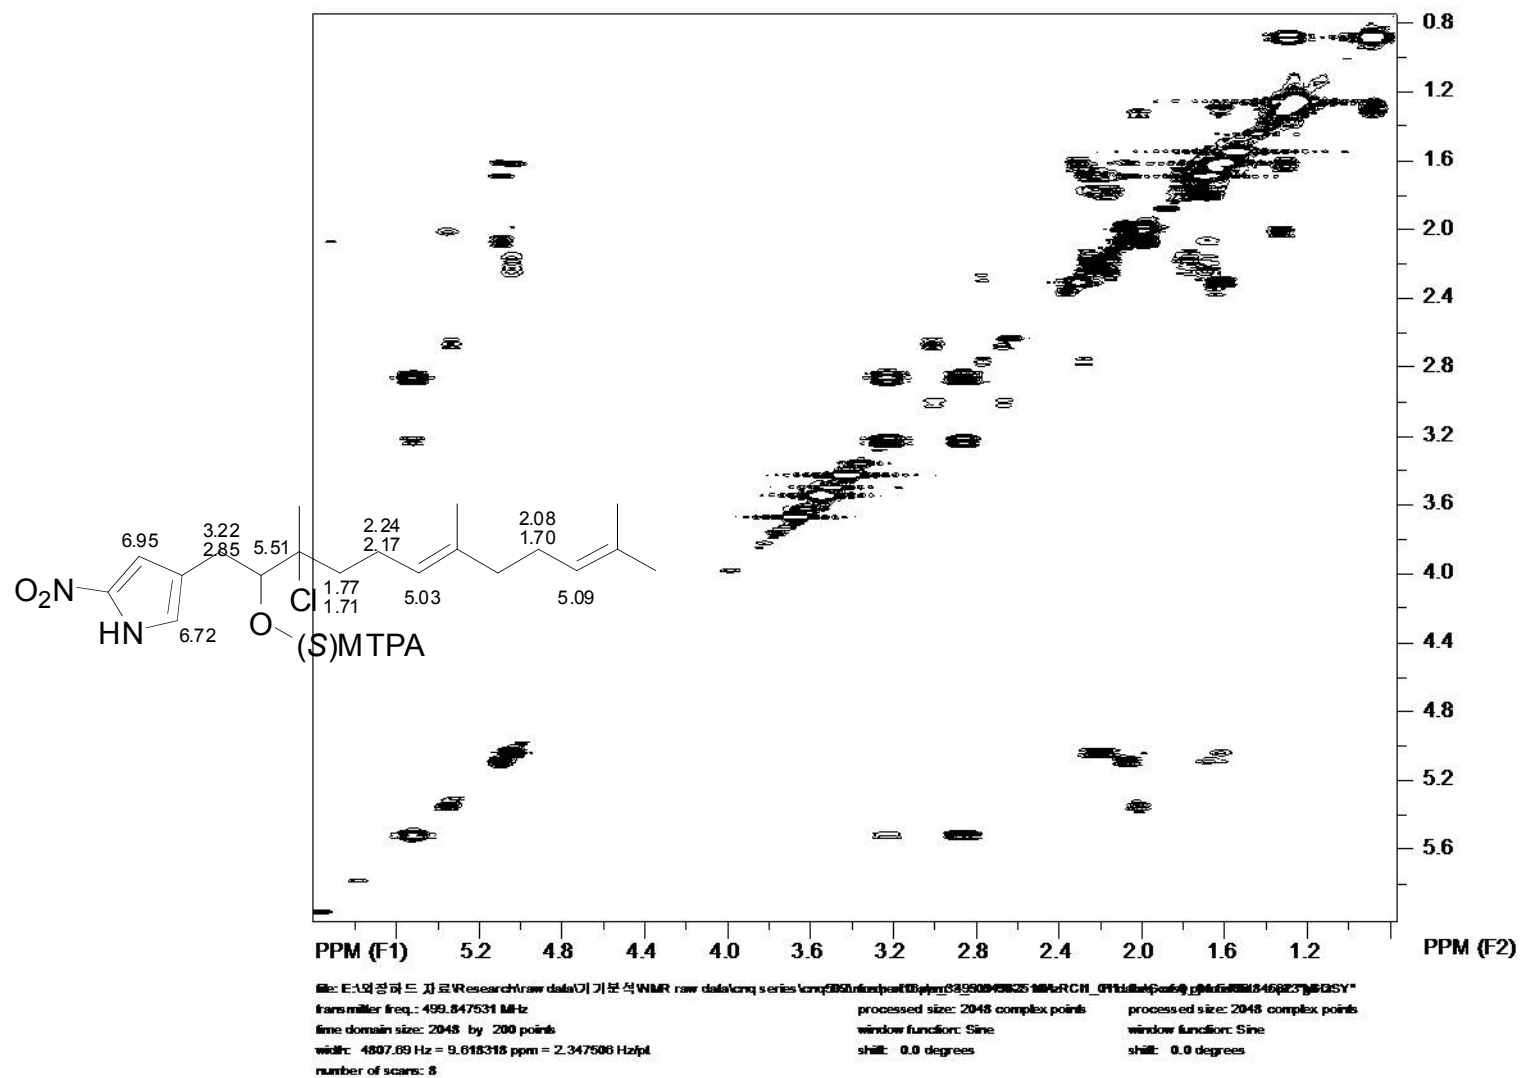

Figure S58  $^1\text{H}$ - $^1\text{H}$  gCOSY spectrum of the (*S*)-Mosher ester of 3 (12a) in pyridine- $d_5$  (500 MHz).



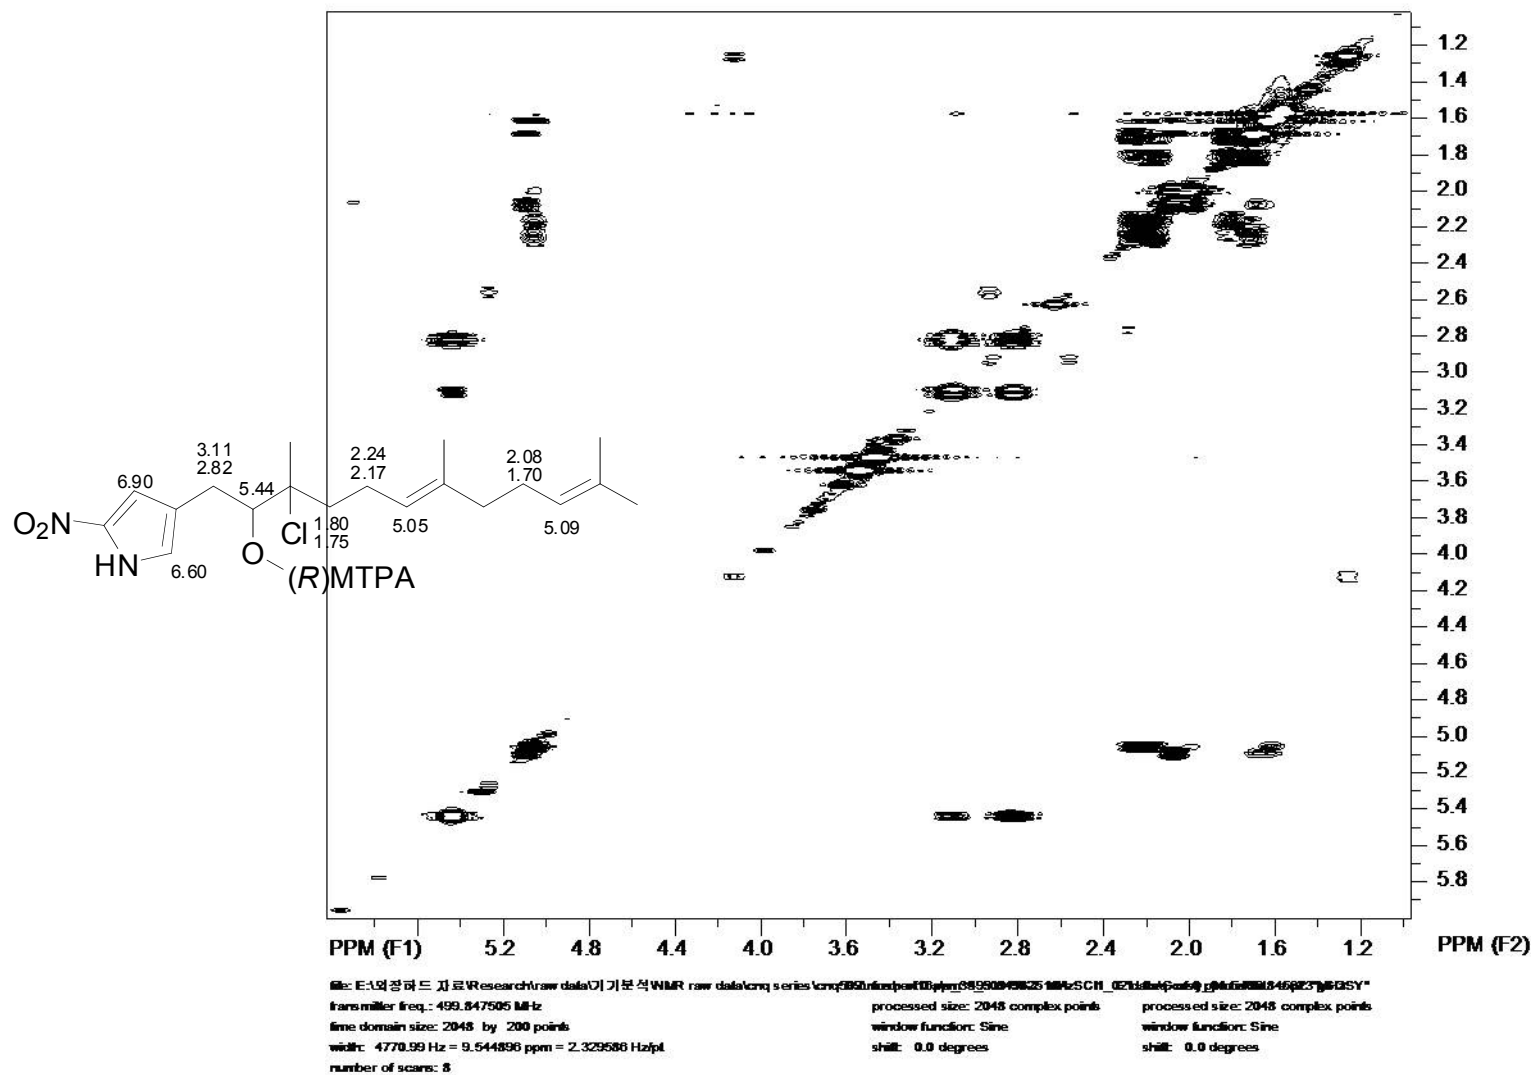

Figure S60  $^1\text{H}$ - $^1\text{H}$  gCOSY spectrum of the *(R)*-Mosher ester of **3** (**12b**) in pyridine- $d_5$  (500 MHz).









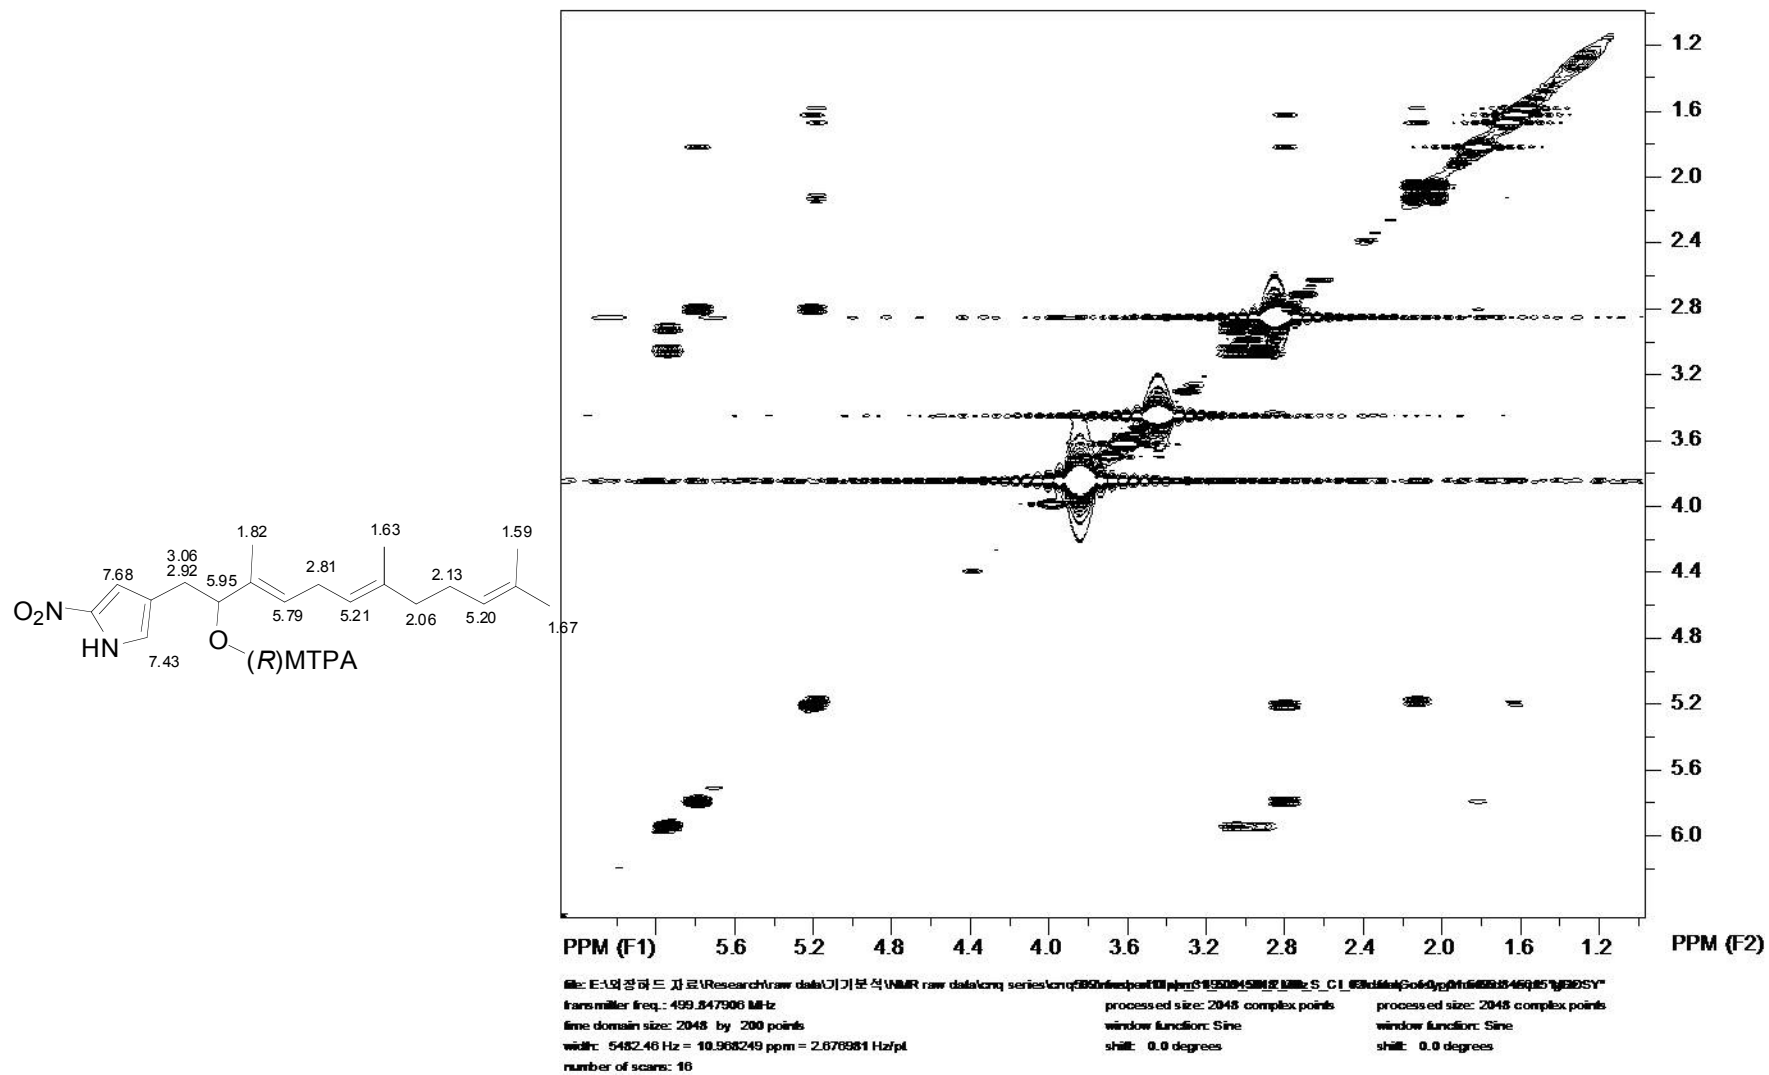

Figure S64  $^1\text{H}$ - $^1\text{H}$  gCOSY spectrum of the (*R*)-Mosher ester of 4 (13b) in pyridine- $d_5$  (500 MHz).

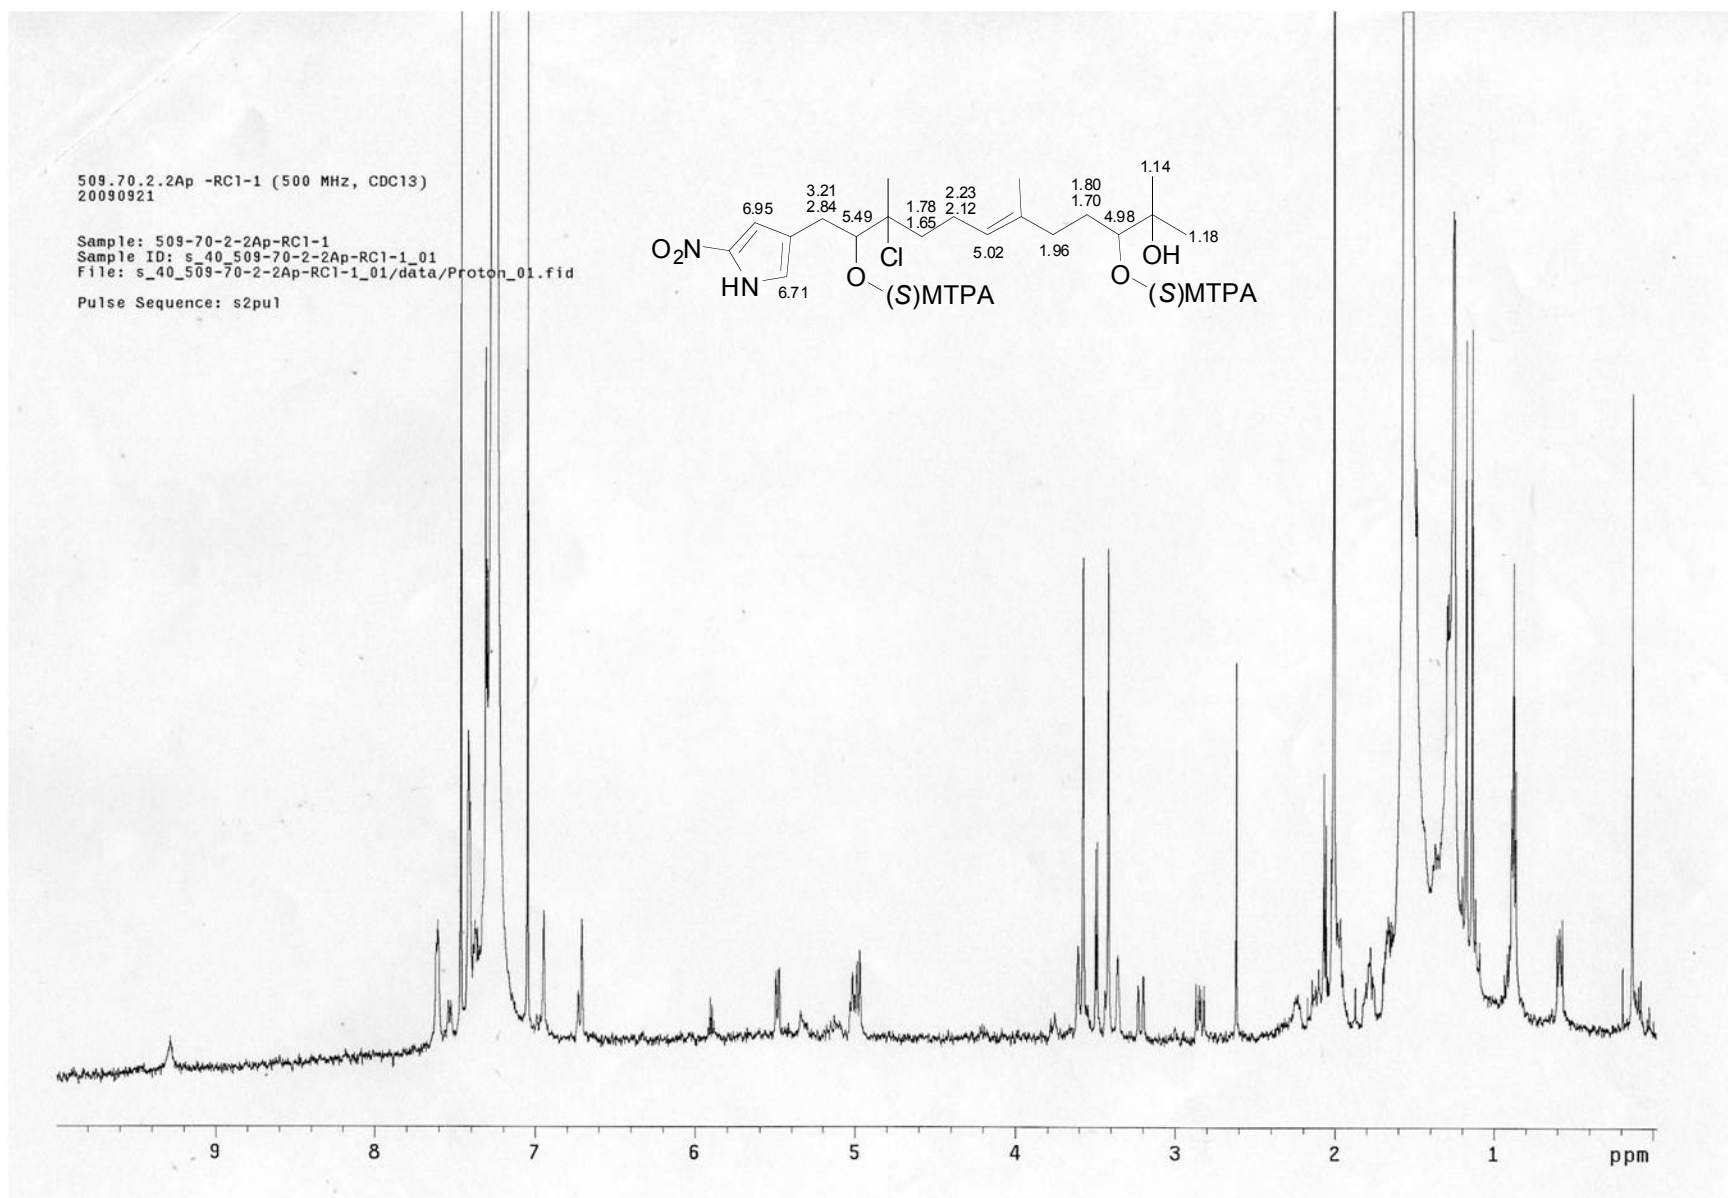

**Figure S65**  $^1\text{H}$  NMR spectrum of the *bis*-(*S*)-Mosher ester of **5** (**14a**) in pyridine- $d_5$  (500 MHz).

SpinWorks 2.5: 509.90.2.2Ap-RC1 (500 MHz, CDCl3)

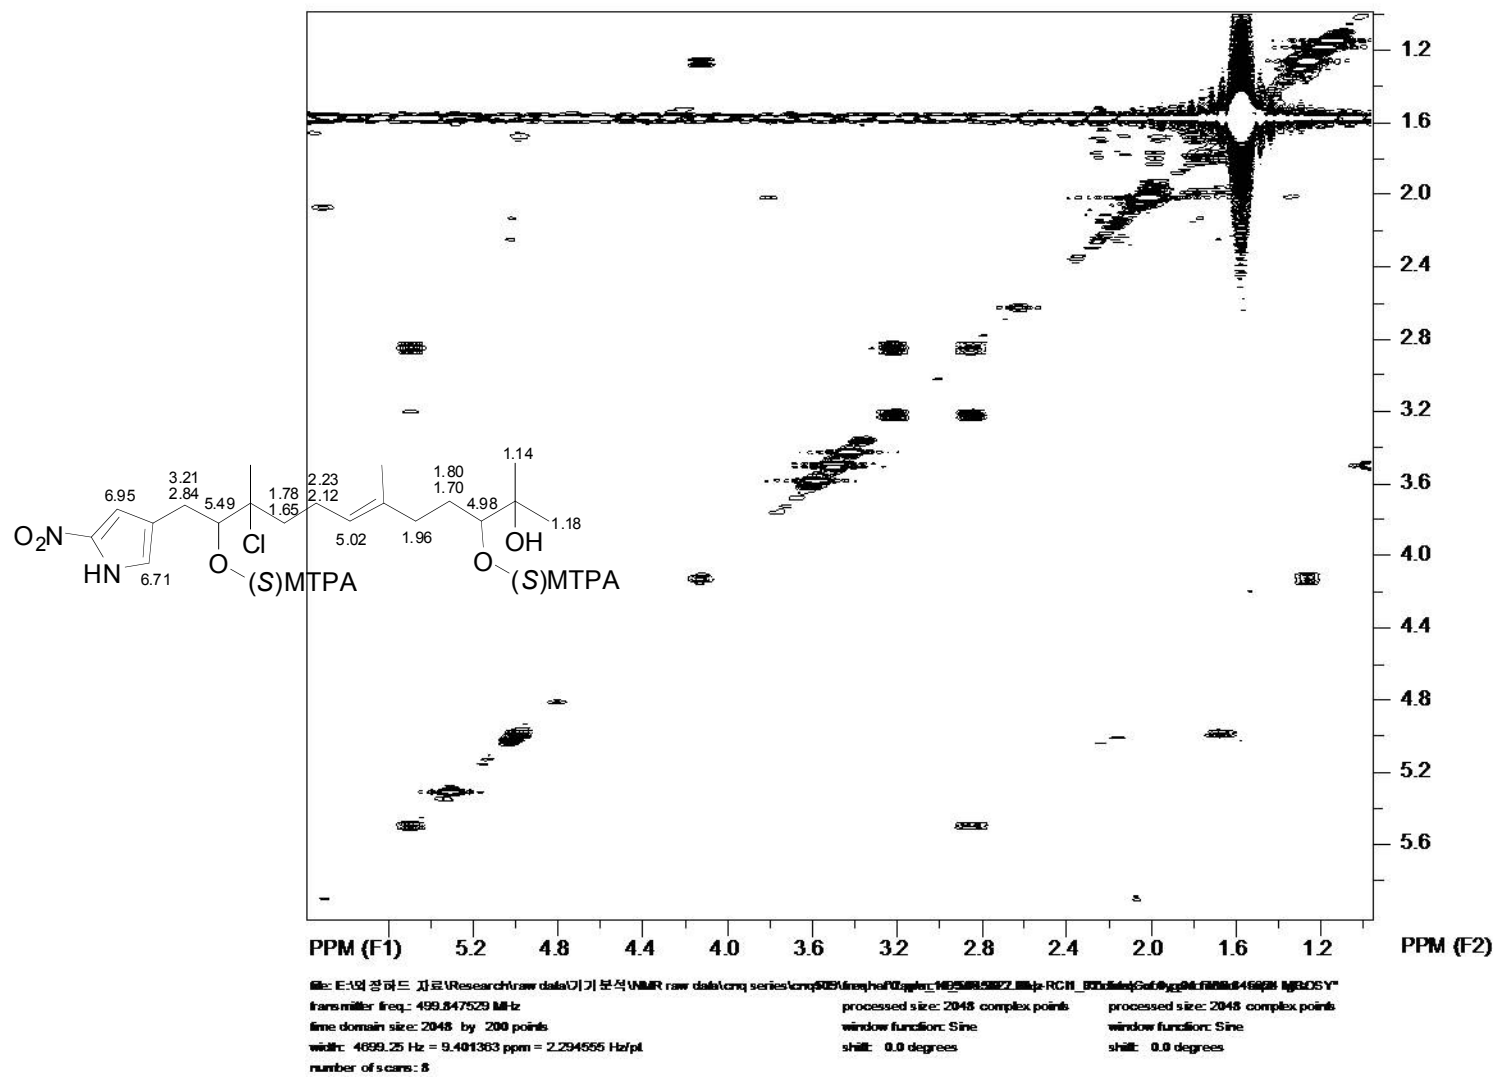

Figure S66  $^1\text{H}$ - $^1\text{H}$  gCOSY spectrum of the *bis*-(*S*)-Mosher ester of **5** (**14a**) in pyridine- $d_5$  (500 MHz).



SpinWorks 2.5: 509.70.2.2Ap-SCI3 (500 MHz, CDCl3)

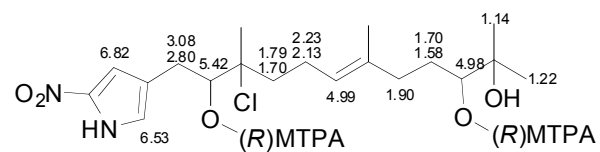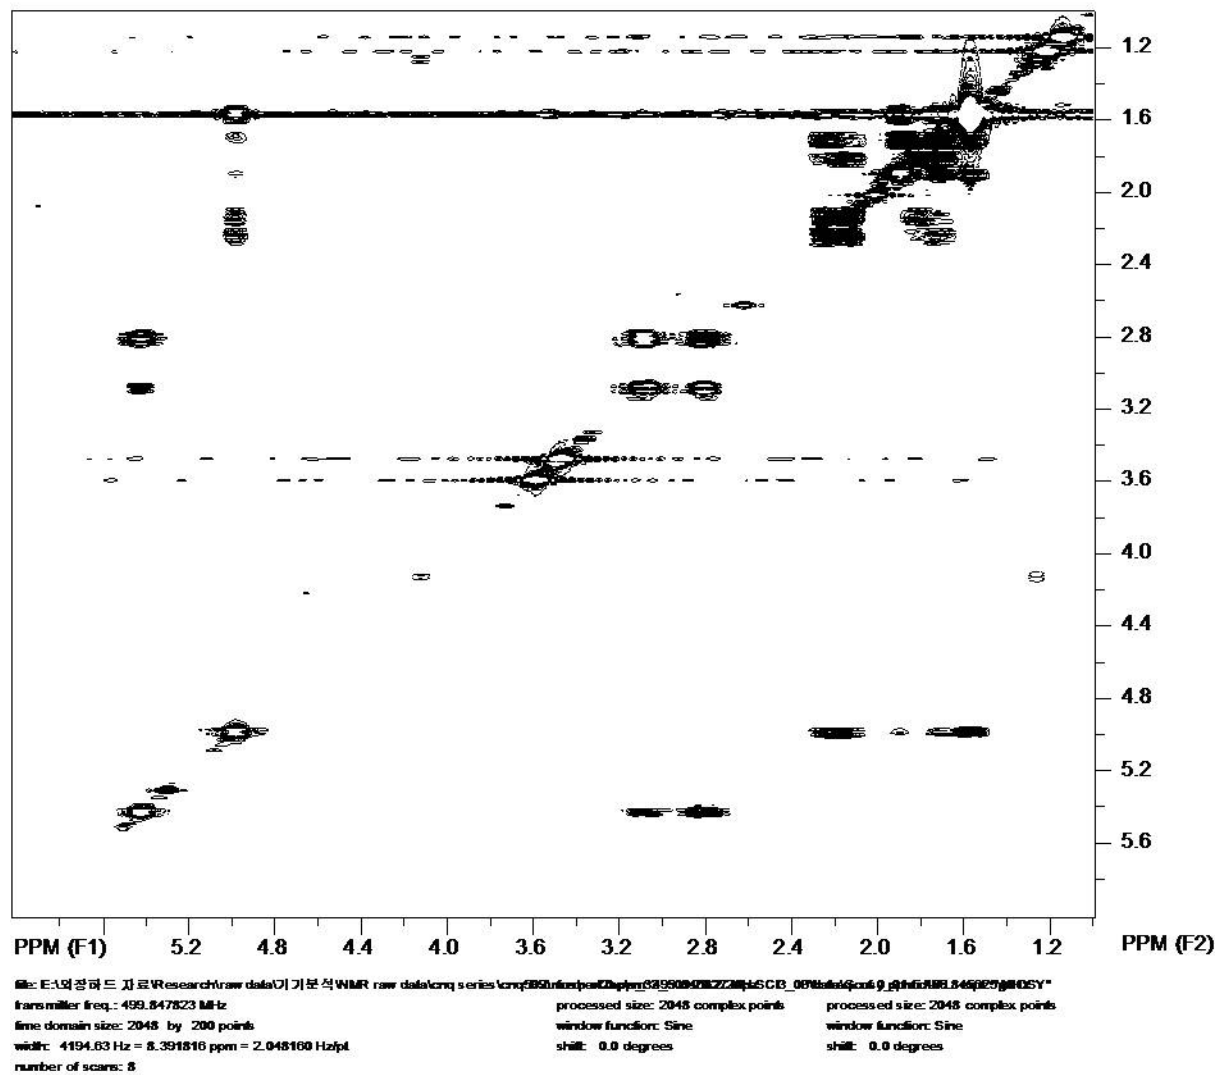

Figure S68  $^1\text{H}$ - $^1\text{H}$  gCOSY spectrum of the *bis*-(*R*)-Mosher ester of **5** (**14b**) in pyridine- $d_5$  (500 MHz).
